# Supplementary material for: Catalyst-free diazo cross-coupling to access useful 3(2H)-furanone derivatives
Source: Royal Society of Chemistry journal article supplement (doi:10.1039/d2cc05912f), 2022-12-20

# Catalyst-Free Diazo Cross-coupling to Access Useful 3(2*H*)-Furanone Derivatives

Amit Vijay Sasane<sup>a</sup>, and Rai-Shung Liu<sup>\*a</sup>

a) Frontier Center for Material Science and Technology and Department of Chemistry,  
National Tsing-Hua University, Hsinchu, Taiwan, ROC-----e-mail:  
rslu@mx.nthu.edu.tw

## Content

|    |                                                                     |     |
|----|---------------------------------------------------------------------|-----|
| 1. | General synthetic procedures for preparation of substrates-----     | S2  |
| 2. | Standard reaction procedures-----                                   | S4  |
| 3. | Chemical functionalization procedure and large-scale synthesis----- | S5  |
| 4. | Verification of ketene intermediates-----                           | S6  |
| 5. | References -----                                                    | S8  |
| 6. | Spectral data of key compounds -----                                | S9  |
| 6. | NOE of compound 3a' -----                                           | S23 |
| 7. | X-ray crystallographic data of compounds -----                      | S24 |
| 8. | <sup>1</sup> H and <sup>13</sup> C spectra of key compounds. -----  | S32 |

## 1.1 General Procedure.

Unless otherwise noted, all the preparations of substrates were performed in oven-dried glassware under a nitrogen atmosphere with freshly distilled solvents. The catalytic reactions were performed under a nitrogen atmosphere. DCE, DCM and Ether were distilled from CaH<sub>2</sub> under nitrogen. THF was re-distilled from Na metal under nitrogen. All other commercial reagents were used without further purification unless otherwise indicated. <sup>1</sup>H NMR and <sup>13</sup>C NMR spectra were recorded on a Bruker 500, 600 MHz and Varian 500,700 MHz spectrometers using chloroform-*d* (CDCl<sub>3</sub>) as the internal standards. High-resolution mass spectral analysis (HRMS) data were measured on JMS-T100LP4G (JEOL) mass spectrometer or a TOF mass analyzer equipped with the ESI source and Magnetic Sector Mass Analyzer (MStation) equipped with the EI source. Brand: JEOL Model: JMS-T200GC AccuTOF GCx, Source mode: FD(field desorption). Single-crystal X-ray diffraction intensity data were collected on a Bruker X8 APEX diffractometer equipped with a CCD area detector and Mo K $\alpha$  radiation ( $\lambda = 0.71073 \text{ \AA}$ ) at 100 K; all data calculations were performed by using the PC version of the APEX2 program package. Final R indices were obtained using those reflections  $I > 2\sigma(I)$ .

## 1.2 1. General synthetic procedures for preparation of diazo ketone<sup>[s1]</sup>

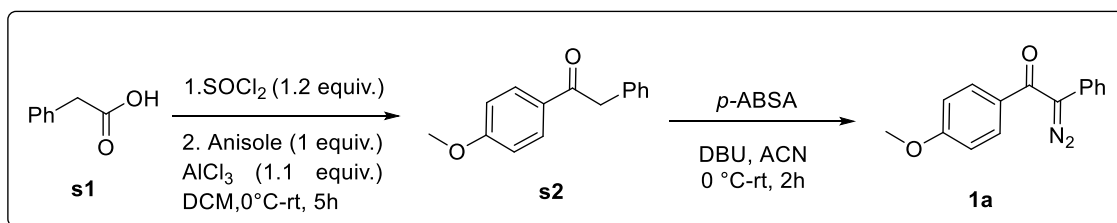

To a DCM (60 ml) solution of substituted phenylacetic acid (**s1**) (3.0 g, 22.03 mmol) was added SOCl<sub>2</sub> (1.91 ml, 26.44 mmol) dropwise at 0 °C. The mixture was warm to room temperature and stirred for 2 h. The resulting solution was cooled to 0 °C, followed by the addition of AlCl<sub>3</sub> (2.93 g, 22.03 mmol) and Anisole (2.39 ml, 22.03 mmol). The mixture was stirred at room temperature for 3h. After completion of the reaction. The reaction was quenched with H<sub>2</sub>O, extracted with ethyl acetate (2 x 50 mL), and washed with brine (25 mL). The combined organic layers were dried over MgSO<sub>4</sub>, concentrated under reduced pressure, and purified by a silica column (EA/Hexane = 15/85) to afford 1-(4-methoxyphenyl)-2-phenylethanone (**s2**) white solid (4.0 g, 17.67 mmol, 80%). To an acetonitrile (23 ml) solution of 1-(4-methoxyphenyl)-2-phenylethanone (1.0 g, 44.19 mmol) was added *p*-ABSA (1.27 g, 53.03 mmol). The solution was cooled to 0 °C and DBU (0.86 ml, 57.45 mmol) was added dropwise to the above mixture and stirred at room temperature for 2 h. The reaction was quenched with H<sub>2</sub>O, followed by extraction with ether (2 x 50 mL), and washed with brine (25 mL). The combined organic layers were dried over MgSO<sub>4</sub>, concentrated under reduced pressure, and purified by a silica column (EA/Hexane = 15/85) to afford 2-diazo-1-(4-methoxyphenyl)-2-phenylethan-1-one (**1a**) (0.836 g, 33.14 mmol, 76%) as yellow solid.

Substrates (**1b – 1j**) were synthesized according to the reported literature above procedure<sup>[s1-a]</sup>

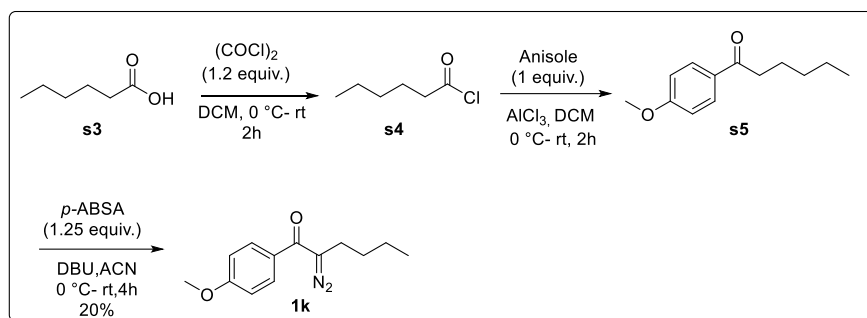

To a DCM (30 ml) solution of substituted hexanoic acid (**s3**) (2.0 g, 17.2 mmol) was added  $(\text{COCl})_2$  (2.95 ml, 34.4 mmol) dropwise at 0 °C. The mixture was warm to room temperature and stirred for 2 h. The resulting solution was cooled to 0 °C, followed by the addition of  $\text{AlCl}_3$  (2.52 g, 18.9 mmol) and Anisole (1.86 ml, 17.2 mmol). The mixture was stirred at room temperature for 2h. After completion of the reaction. The reaction was quenched with  $\text{H}_2\text{O}$ , extracted with DCM (2 x 50 mL), and washed with brine (25 mL). The combined organic layers were dried over  $\text{MgSO}_4$ , concentrated under reduced pressure, and purified by a silica column (EA/Hexane = 15/85) to afford 1-(4-methoxyphenyl)hexan-1-one (**s5**) white solid (3.50 g, 16.97 mmol, 98%). To an acetonitrile (20 ml) solution of 1-(4-methoxyphenyl)hexan-1-one (1.5 g, 7.27 mmol) was added *p*-ABSA (2.18 g, 9.09 mmol, 1.25 equiv.). The solution was cooled to 0 °C and DBU (1.47 ml, 8.72 mmol, 1.3 equiv.) was added dropwise to the above mixture and stirred at room temperature for 2 h. The reaction was quenched with  $\text{H}_2\text{O}$ , followed by extraction with ether (2 x 50 mL), and washed with brine (25 mL). The combined organic layers were dried over  $\text{MgSO}_4$ , concentrated under reduced pressure, and purified by a silica column (EA/Hexane = 15/85) to afford 2-diazo-1-(4-methoxyphenyl)hexan-1-one (**1k**) (400 mg, 1.72 mmol, 24%) as yellow oil.

Substrate **1l** synthesized according to above procedure <sup>[s1-b]</sup>

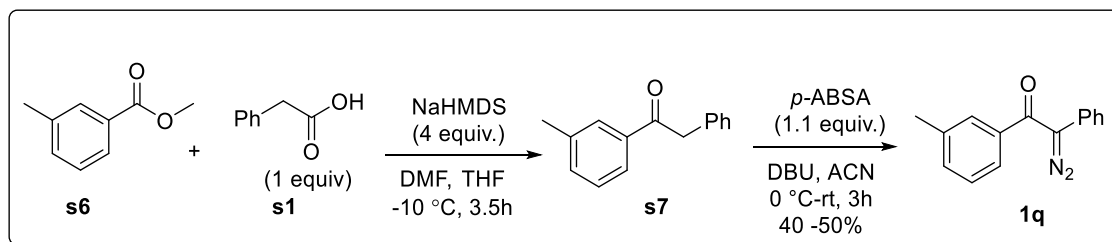

To a solution of aromatic acetic acid **s1** (0.9 gm, 6.66 mmol, 1.0 eq.) and aromatic methyl ester **s6** (1 gm, 6.66 mmol, 1.0 eq.) in DMF (3 mL) was added NaHMDS (2.0 M in THF) (5.43 mL, 4.0 eq.) at -10°C over 1 min. The resulting mixture was stirred at -10°C for 3.5 hours. To the resulting solution was then added saturated aqueous  $\text{NH}_4\text{Cl}$  solution. The resulting mixture was extracted with EtOAc (2x30 ml). The combined organic phase was washed with brine, dried over sodium sulfate and concentrated in vacuo. The residue was purified by silica gel column chromatography to afford desired ketone **s7**. The compound **s7** was dissolved in ACN at 0 °C

and *p*-ABSA (0.60 gm, 2.51 mmol, 1.2 equiv.) was added to above solution and DBU (0.38 mL, 1.21 equiv.) was added dropwise to the above mixture at 0 °C and stirred at room temperature for 3h. The reaction was quenched with H<sub>2</sub>O, followed by extraction with ether (3 x 50 mL), and washed with brine (25 mL). The combined organic layers were dried over MgSO<sub>4</sub>, concentrated under reduced pressure, and purified by a silica column (EA/Hexane = 15/85) to afford 2-diazo-2-phenyl-1-(*m*-tolyl) ethan-1-one (**1q**) (0.24 g, 1.02 mmol, 48%) as yellow solid.

Substrates (**1r** –**1s**) were synthesized according to the reported literature above procedure <sup>[s1-c]</sup>

Substrate **1s** having non-separable impurities and it used as without further purification.

Substrates (**1m**-**1p**) were synthesized according to reported literature. <sup>[s1-d]</sup>

Substrates **1t**, and **1u** were synthesized according to reported literature. <sup>[s1-e]</sup>

### 1.2.3 Preparation of $\alpha$ -diazo esters.

**2a** is commercially available from Sigma-Aldrich.

All  $\alpha$ -diazo esters (**2b-2i**) were prepared from the reported procedure in the literature. <sup>[s2]</sup>

## 2. Standard reaction procedures

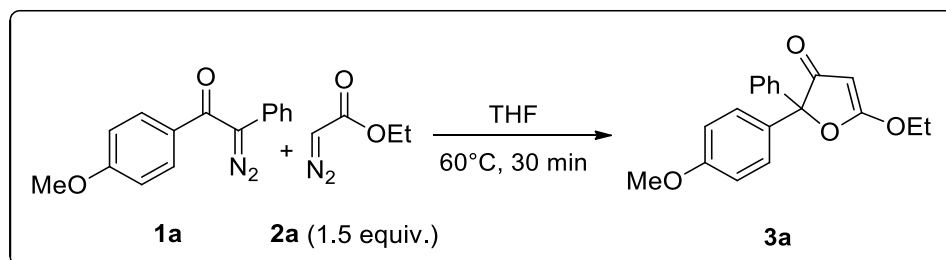

A Schlenk tube charged with freshly distilled out THF (2 mL) and heated up to the 65°C in oil bath, then to that pre-heated solution of THF, suspension of **1a** (50 mg, 0.198 mmol) and **2a** (34 mg, 0.297 mmol, 1.5 equiv.) in THF (1 mL) was added quickly at 60°C and resultant reaction mixture continue for 30 min at same temperature. Reaction monitor by using TLC and after completion of reaction solvent was removed under reduced pressure and eluted through a silica gel column with ethyl acetate/ hexane (25/75) to afford 5-ethoxy-2-(4-methoxyphenyl)-2-phenylfuran-3(2H)-one (**3a**) (50 mg, 0.161 mmol, 81%) as a colorless oil.

### 3. Chemical functionalization procedure and Large scale synthesis

#### 3.1. Synthesis 2-(4-chlorophenyl)-5-methyl-2-phenylfuran-3(2H)-one (6)

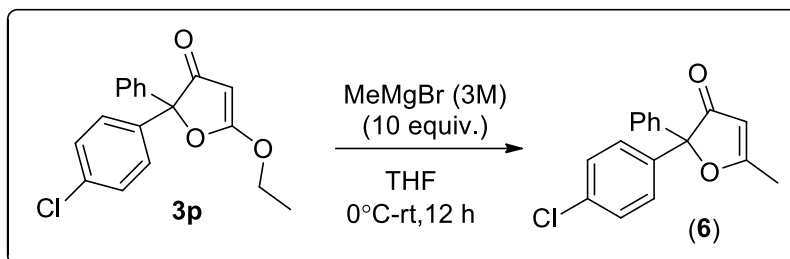

To a THF (3 mL) solution of 2-(4-chlorophenyl)-5-ethoxy-2-phenylfuran-3(2H)-one (**3p**) (30 mg, 0.095 mmol) was added MeMgBr (0.31 mL, 10 equiv.) at 0°C and the reaction is stirred at room temperature for 12 h. After completion of the reaction, reaction was quenched by saturated NH<sub>4</sub>Cl solution (2 mL), followed by extraction with ether (3 x 5 mL), and washed with brine (5 mL). The combined organic layers were dried over MgSO<sub>4</sub>, concentrated under reduced pressure, and purified by a silica column (EA/Hexane = 15/85) to afford 2-(4-chlorophenyl)-5-methyl-2-phenylfuran-3(2H)-one (**6**) (12.2 mg, 0.042 mmol, 45%) as a colorless oil.

#### 3.2. Synthesis 2,2-diphenyltetrahydrofuran-3-ol (5)

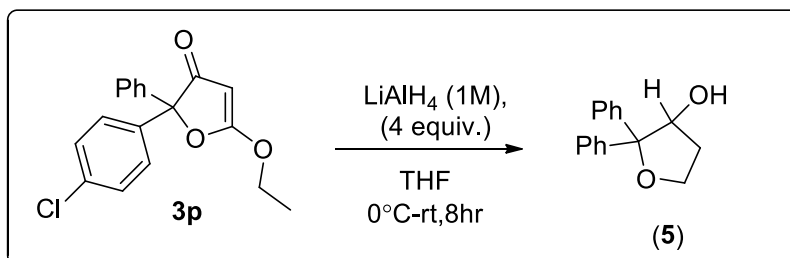

To a THF (3 mL) solution of 2-(4-chlorophenyl)-5-ethoxy-2-phenylfuran-3(2H)-one (**3p**) (30 mg, 0.095 mmol) was added LAH (1M, 0.38 mL, 4 equiv.) at 0°C and the reaction is stirred at room temperature for 8 h. After completion of the reaction, reaction was quenched by H<sub>2</sub>O (2 mL), followed by extraction with ether (3 x 5 mL), and washed with brine (5 mL). The combined organic layers were dried over MgSO<sub>4</sub>, concentrated under reduced pressure, and purified by a silica column (EA/Hexane = 15/85) to afford 2,2-diphenyltetrahydrofuran-3-ol (**5**) (11.2 mg, 0.046 mol, 49%) as a colorless oil.

#### 3.3. Synthesis (2R,3S)-2-phenyl-2-(p-tolyl)tetrahydrofuran-3-ol (7a) and (2R,3R)-2-phenyl-2-(p-tolyl)tetrahydrofuran-3-ol (7b)

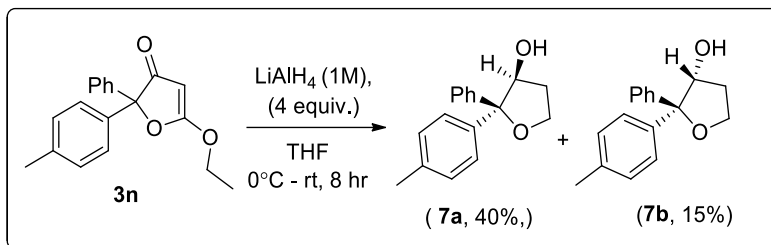

To a THF (3 mL) solution of (*R*)-5-ethoxy-2-phenyl-2-(*p*-tolyl)furan-3(*2H*)-one (**3n**) (60 mg, 0.20 mmol) was added LAH (1M, 0.85 mL, 4 equiv.) at  $0^\circ\text{C}$  and the reaction is stirred at room temperature for 8 h. After completion of the reaction, reaction was quenched by  $\text{H}_2\text{O}$  (2 mL), followed by extraction with ether (3 x 5 mL), and washed with brine (5 mL). The combined organic layers were dried over  $\text{MgSO}_4$ , concentrated under reduced pressure, and purified by a silica column (EA/Hexane = 20/80) to afford (*2R,3S*)-2-phenyl-2-(*p*-tolyl)tetrahydrofuran-3-ol (**7a**) (21 mg, 0.077 mol, 40%) as white solid and (*2R,3R*)-2-phenyl-2-(*p*-tolyl)tetrahydrofuran-3-ol (**7b**) (8 mg, 0.031 mmol, 15%) as colorless oil.

### 3.4. Large scale synthesis.

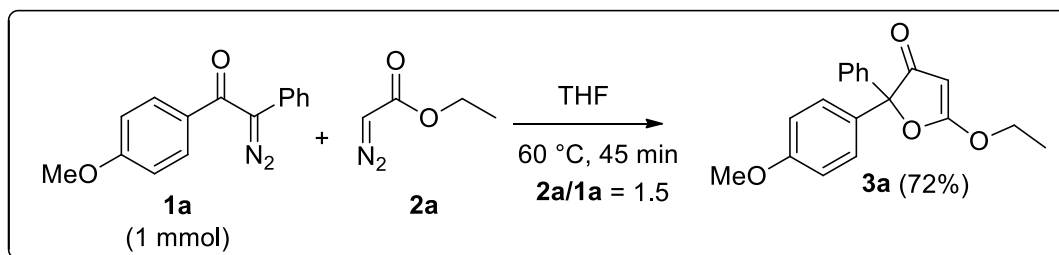

A Schlenk tube charged with freshly distilled out THF (8 mL) and heated up to the  $65^\circ\text{C}$  in oil bath, then to that pre-heated solution of THF, suspension of **1a** (252.3 mg, 1.00 mmol) and **2a** (171.1 mg, 1.50 mmol, 1.5 equiv.) in THF (3 mL) was added quickly at  $60^\circ\text{C}$  and resultant reaction mixture continue for 45 min at same temperature. Reaction monitor by using TLC and after completion of reaction solvent was removed under reduced pressure and eluted through a silica gel column with ethyl acetate/ hexane (25/75) to afford 5-ethoxy-2-(4-methoxyphenyl)-2-phenylfuran-3(*2H*)-one (**3a**) (224 mg, 0.72 mmol, 72%) as a colorless oil.

## 4. Verification of ketene intermediates

### 1. Synthesis of (*3S,4R*)-3-(4-methoxyphenyl)-1,3,4-triphenylazetid-2-one (**8a**) and (*3S,4S*)-3-(4-methoxyphenyl)-1,3,4-triphenylazetid-2-one (**8b**)

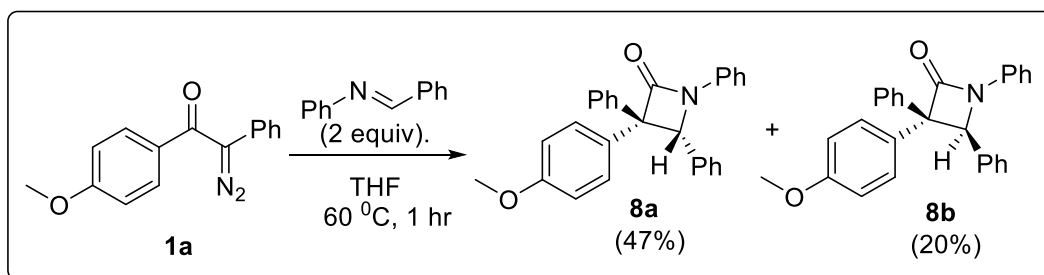

A Schlenk tube charged with freshly distilled out THF (2 mL) and heated up to the 60 °C in oil bath, then to that pre-heated solution of THF, suspension of **1a** (50 mg, 0.198 mmol) and (*E*)-*N*,1-diphenylmethanimine (71.8 mg, 0.39 mmol, 2 equiv.) in THF (1mL) was added quickly at 60°C and resultant reaction mixture continue for 1 hr at same temperature. Reaction monitor by using TLC and after completion of reaction solvent was removed under reduced pressure and eluted through a silica gel column with ethyl acetate/ hexane (20/80) to afford (*3S,4R*)-3-(4-methoxyphenyl)-1,3,4-triphenylazetid-2-one (**8a**) (37.8 mg, 0.093 mmol, 47%) as white solid and (*3S,4S*)-3-(4-methoxyphenyl)-1,3,4-triphenylazetid-2-one (**8b**) (16.1 mg, 0.039 mmol, 20%) as white solid.

## 2. Synthesis of (*3S,4R*)-3-(4-methoxyphenyl)-1,3,4-triphenylazetid-2-one (**8a**) and (*3S,4S*)-3-(4-methoxyphenyl)-1,3,4-triphenylazetid-2-one (**8b**)

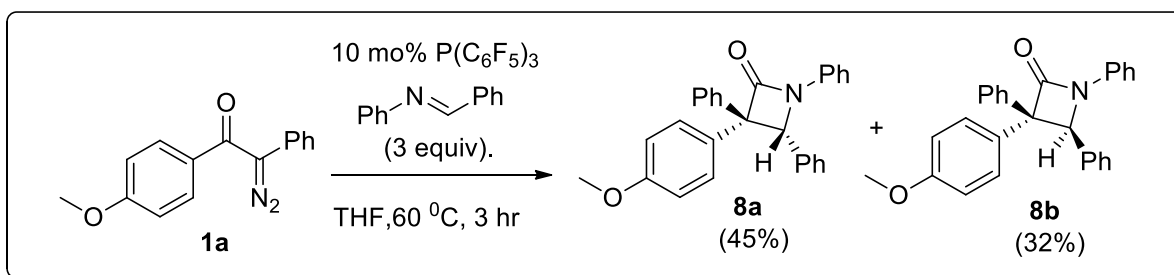

A Schlenk tube charged with 10 mol%  $P(C_6F_5)_3$  and freshly distilled out THF (1 mL) was added and stirred at rt heated up to the 65 °C in oil bath, then to that pre-heated solution of THF, suspension of **1a** (50 mg, 0.198 mmol) and (*E*)-*N*,1-diphenylmethanimine (107 mg, 0.59 mmol, 2 equiv.) in THF (2mL) was added quickly at 60 °C and resultant reaction mixture continue for 3 hr at same temperature. Reaction monitor by using TLC and after completion of reaction solvent was removed under reduced pressure and eluted through a silica gel column with ethyl acetate/ hexane (20/80) to afford (*3S,4R*)-3-(4-methoxyphenyl)-1,3,4-triphenylazetid-2-one (**8a**) (36.2 mg, 0.089 mmol, 47%) as white solid and (*3S,4S*)-3-(4-methoxyphenyl)-1,3,4-triphenylazetid-2-one (**8b**) (25.7 mg, 0.063 mmol, 33%) as white solid.

## 3. Synthesis of benzyl 2-(4-methoxyphenyl)-2-phenylacetate (**8c**)

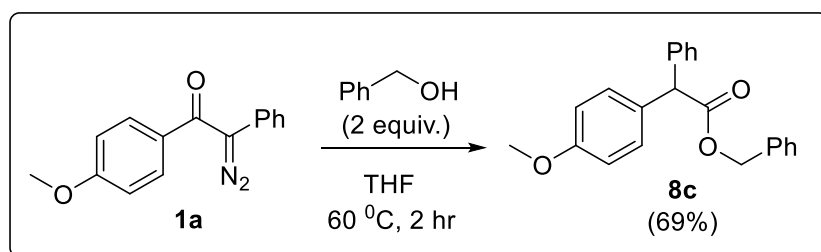

A Schlenk tube charged with freshly distilled out THF (2 mL) and heated up to the 65°C in oil bath, then to that pre-heated solution of THF, suspension of **1a** (50 mg, 0.198 mmol) and Benzyl alcohol (42 mg, 0.39 mmol, 2 equiv.) in THF (1mL) was added quickly at 60°C and resultant reaction mixture continue for 2hr at same temperature. Reaction monitor by using TLC and after completion of reaction solvent was removed under reduced pressure and eluted through a silica gel column with ethyl acetate/ hexane (10/90) to afford 2-(4-methoxyphenyl)-2-phenylacetate (**8c**) (45.4 mg, 0.0136 mmol, 69%) as a colorless oil.

#### 4. References

- [s<sup>1</sup>] (a) S. A. More, V. A. Sadaphal, T-C Kuo, M-J Cheng, and R.-S. Liu, *Chem. Commun.*, 2022, **58**,10064–10067; (b) X. L. Yan, N. Zhang, Z. Q. Hao, Z. H. Ma, Z. G. Han, X. Z. Zheng, and J. Lin. *Polyhedron* **147** (2018) 75–79; (c) 1) G. Wu, W. Yin. H. C. Shen, and Y. Huang, *Green Chem.*, 2012, **14**, 580-585; 2) S. Ghosh, I. Banerjee, and S. Baul, *Tetrahedron* **55** (1999) 11537-11546; (d) 1) C. N. Chen, W. M. Cheng, J. K. Wang, T. H. Chao, M. J. Cheng, and R.-S. Liu, *Angew. Chem. Int. Ed.* **2021**, 60, 4479-4484; *Angew. Chem.* 2021, **133**, 4529-4534; 2) J. Vaitala, A. Bayer, and K. H. Hopman, *Angew. Chem. Int. Ed.* 2017, **56**, 4277-4281; (e) Q. Lu, S. Mondal, S. Cembellín, and F. Glorius, *Angew. Chem. Int. Ed.* 2018, **57**, 10732-10736.
- [s<sup>2</sup>] (1) D. M. Carminati, D. Intrieri, A. Caselli, S. Le Gac, B. Boitrel, L. Toma, L. Legnani, and E. Gallo, *Chem. Eur. J.* 2016, **22**, 13599-13612; (2) H. S. A. Mandour, Y. Nakagawa, M. Tone, H. Inoue, N. Otag, I. Fujisawa, S. Chanthamath, and S. I. Beilstein, *J. Org. Chem.* 2019, **15**, 357–363; (3) J.-H. Chu, X.-H. Xu, S.-M. Kang, N. Liu, and Z.-Q. Wu, *J. Am. Chem. Soc.* 2018, **140**, 17773–17781; (4) T. Xiao, P. Peng, Y. Xie, Z.-Y. Wang, and L. Zhou, *Org. Lett.* 2015, **17**, 4332–4335; (5) R. D. Kardile, and R.-S. Liu, *Org. Lett.* 2019, **21**, 6452–6456; (6) A. S. Narode, and R.-S. Liu, *Org. Lett.* 2022, **24**, 2165–2169; (7) T. Torna, J. Shimokawa, and T. Fukuyama, *Org. Lett.* 2007, **9**, 3195–3197; (8) H. Mao, A. Lin, Y. Shi, Z. Mao, X. Zhu, W. Li, H. Hu, Y. Cheng, and C. Zhu, *Angew. Chem. Int. Ed.* 2013, **52**, 6288–6292; (9) D. M. Hodgson, and D. Angrish, *Chem. Eur. J.* 2007, **13**, 3470-3479. (10) S. P. Bew, P.-A. Ashford, and D. U. Bacher, *Synthesis* 2013, **45**, 903–912



## 5. Spectral data of key compounds

### Spectral data for 2-diazo-1-(4-methoxyphenyl)hexan-1-one (1k)

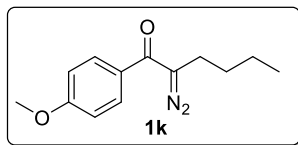

Yellow oil, (400 mg, 1.72 mmol, 24%);  $^1\text{H}$  NMR (500 MHz,  $\text{CDCl}_3$ ):  $\delta$  7.55 (d,  $J = 10$  Hz, 2H), 7.89 (d,  $J = 9.1$  Hz, 2H), 3.82 (s, 3H), 2.49 (t,  $J = 10$  Hz, 2H), 1.54 ~ 1.51 (m, 2H), 1.43 ~ 1.38 (m, 2H), 0.93 (t,  $J = 5$  Hz, 3H);  $^{13}\text{C}$  NMR (125 MHz,  $\text{CDCl}_3$ ):  $\delta$  188.6, 161.9, 130.4, 129.2, 113.6, 55.3, 29.1, 23.3, 21.9, 13.7, (C=N<sub>2</sub>) Peak not showing because of low intensity; HRMS- ESI+ calcd. for  $\text{C}_{13}\text{H}_{16}\text{O}_2\text{N}_2$  (M+Na): 255.1109; found: 255.1107.

### Spectral data for 1-(3-bromophenyl)-2-diazo-2-phenylethan-1-one (1r)

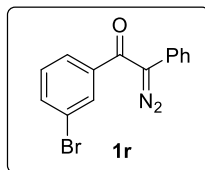

Brown solide, (350 mg, 1.16 mmol, 64%);  $^1\text{H}$  NMR (500 MHz,  $\text{CDCl}_3$ ):  $\delta$  7.74 (t,  $J = 2.0$  Hz, 2H), 7.61 ~ 7.59 (m, 1H), 7.49 ~ 7.46 (m, 1H), 7.43 ~ 7.37 (m, 4H), 7.28 ~ 7.23 (m, 2H);  $^{13}\text{C}$  NMR (125 MHz,  $\text{CDCl}_3$ ):  $\delta$  186.5, 139.6, 134.5, 130.8, 129.9, 129.1, 127.3, 126.2, 126.2, 125.6, 122.7, 73.3; HRMS-FD+ calcd. for  $\text{C}_{14}\text{H}_9\text{ON}_2\text{Br}$ : 299.9903; found: 299.9896.

### Spectral data for 2-diazo-1-(4-methoxyphenyl)propan-1-one (1l)

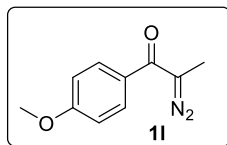

Yellow solide, (220 mg, 1.16 mmol, 38%);  $^1\text{H}$  NMR (400 MHz,  $\text{CDCl}_3$ ):  $\delta$  7.56 (d,  $J = 9.2$  Hz, 2H), 6.89 (d,  $J = 9.2$  Hz, 2H), 3.81 (s, 3H), 2.11 (s, 3H);  $^{13}\text{C}$  NMR (100 MHz,  $\text{CDCl}_3$ ):  $\delta$  189.0, 162.0, 130.2, 129.2, 113.6, 62.0, 55.3, 9.7; HRMS-FD+ calcd. for  $\text{C}_{10}\text{H}_{10}\text{O}_2\text{N}_2$ : 190.0747; found: 190.0742.

### Spectral data for 5-ethoxy-2-(4-methoxyphenyl)-2-phenylfuran-3(2*H*)-one (3a)

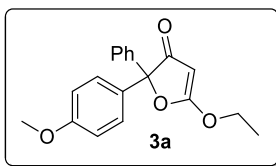

colorless oil, (50 mg, 0.161 mmol, 81%); <sup>1</sup>H NMR (700 MHz, CDCl<sub>3</sub>): δ 7.45 (d, *J* = 7.0 Hz, 2H), 7.36 (d, *J* = 9.1 Hz, 2H), 7.33 ~ 7.29 (m, 3H), 6.84 (d, *J* = 8.4 Hz, 2H), 4.80 (s, 1H), 4.29 (q, *J* = 7.0 Hz, 2H), 3.77 (s, 3H), 1.46 (t, *J* = 7.0 Hz, 3H); <sup>13</sup>C NMR (175 MHz, CDCl<sub>3</sub>): δ 197.9, 183.3, 159.7, 138.0, 130.1, 128.3, 128.3, 126.4, 113.7, 94.2, 79.0, 55.2, 14.2; HRMS- ESI+ calcd. for C<sub>19</sub>H<sub>18</sub>O<sub>4</sub> (M+Na): 333.1103; found: 333.1166.

### Spectral data for ethyl (*E*)-4-(4-methoxyphenyl)-4-oxo-3-phenylbut-2-enoate (3a')

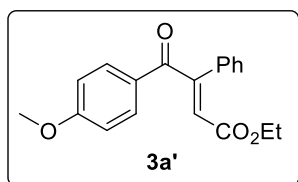

colorless oil, (24.6 mg, 0.079 mmol, 40%); <sup>1</sup>H NMR (500 MHz, CDCl<sub>3</sub>): δ 7.90 (d, *J* = 8.0 Hz, 2H), 7.38 (d, *J* = 4.5 Hz, 2H), 7.32 (d, *J* = 5.0 Hz, 3H), 6.89 (d, *J* = 8.5 Hz, 2H), 6.16 (s, 1H), 4.08 (q, *J* = 8.0 Hz, 2H), 3.83 (s, 3H), 1.11 (t, *J* = 8.0 Hz, 3H); <sup>13</sup>C NMR (125 MHz, CDCl<sub>3</sub>): δ 194.1, 165.4, 164.0, 152.7, 134.4, 132.5, 128.8, 128.3, 128.0, 122.3, 113.9, 113.9, 60.7, 55.5, 13.8; HRMS-ESI+ calcd. for C<sub>19</sub>H<sub>18</sub>O<sub>4</sub> (M+Na): 333.1102; found: 333.1103

### Spectral data for 2-(4-chlorophenyl)-5-ethoxy-2-(4-methoxyphenyl)furan-3(2*H*)-one (3b)

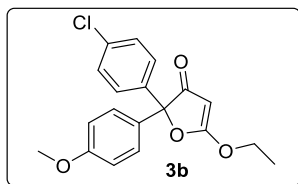

colorless oil, (45.7 mg, 0.132 mmol, 76%); <sup>1</sup>H NMR (700 MHz, CDCl<sub>3</sub>): δ 7.40 (d, *J* = 8.4 Hz, 2H), 7.32 (d, *J* = 8.4 Hz, 2H), 7.29 (d, *J* = 8.4 Hz, 2H), 6.84 (d, *J* = 8.4 Hz, 2H), 4.80 (s, 1H), 4.29 (q, *J* = 7.0 Hz, 2H), 3.77 (s, 3H), 1.46 (t, *J* = 7.0 Hz, 3H); <sup>13</sup>C NMR (175 MHz, CDCl<sub>3</sub>): δ 197.5, 183.4, 159.8, 136.5, 134.4, 129.8, 128.5, 128.2, 127.8, 113.8, 93.5, 78.9, 68.1, 55.3, 14.2; HRMS-ESI+ calcd. for C<sub>19</sub>H<sub>17</sub>ClO<sub>4</sub> (M+Na): 367.0713; found: 367.0727

**Spectral data for 5-ethoxy-2-(4-methoxyphenyl)-2-(4-nitrophenyl)furan-3(2H)-one (3c)**

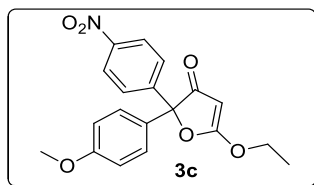

colorless oil, (49.6 mg, 0.139 mmol, 83%);  $^1\text{H NMR}$  (700 MHz,  $\text{CDCl}_3$ ):  $\delta$  8.16 (d,  $J = 9.1$  Hz, 2H), 7.68 (d,  $J = 9.1$  Hz, 2H), 7.33 (d,  $J = 9.1$  Hz, 2H), 6.85 (d,  $J = 9.1$  Hz, 2H), 4.82 (s, 1H), 4.32 (q,  $J = 7.0$  Hz, 2H), 3.77 (s, 3H), 1.48 (t,  $J = 7.0$  Hz, 3H);  $^{13}\text{C NMR}$  (175 MHz,  $\text{CDCl}_3$ ):  $\delta$  196.3, 183.4, 160.1, 147.7, 144.8, 129.3, 128.3, 127.0, 123.4, 114.0, 93.0, 78.9, 68.5, 55.3, 14.2; HRMS-ESI+ calcd. for  $\text{C}_{19}\text{H}_{17}\text{O}_6$  ( $\text{M}+\text{Na}$ ): 355.1056; found: 355.1057.

**Spectral data for 2-(4-bromophenyl)-5-ethoxy-2-(4-methoxyphenyl)furan-3(2H)-one (3d)**

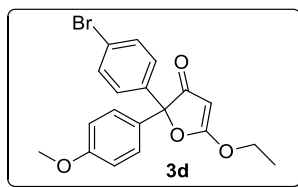

colorless oil, (47 mg, 0.120 mmol, 80%);  $^1\text{H NMR}$  (700 MHz,  $\text{CDCl}_3$ ):  $\delta$  7.44 (d,  $J = 8.4$  Hz, 2H), 7.35 ~ 7.32 (m, 2H), 6.84 (d,  $J = 9.1$  Hz, 2H), 4.79 (s, 1H), 4.29 (q,  $J = 7.0$  Hz, 2H), 3.76 (s, 3H), 1.45 (t,  $J = 7.0$  Hz, 3H);  $^{13}\text{C NMR}$  (175 MHz,  $\text{CDCl}_3$ ):  $\delta$  197.4, 183.3, 159.8, 137.0, 131.4, 129.7, 128.2, 128.0, 122.6, 113.8, 93.5, 78.9, 68.1, 55.2, 14.2; HRMS-ESI+ calcd. for  $\text{C}_{19}\text{H}_{17}\text{O}_4\text{Br}$ : 388.0310; found: 388.0309

**Spectral data for 5-ethoxy-2-(4-methoxyphenyl)-2-(*p*-tolyl)furan-3(2H)-one (3e)**

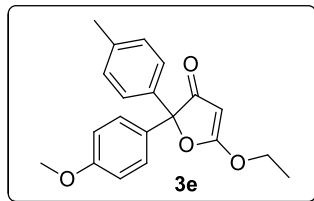

colorless oil, (51.8 mg, 0.159 mmol, 85%);  $^1\text{H NMR}$  (700 MHz,  $\text{CDCl}_3$ ):  $\delta$  7.35 (d,  $J = 9.1$  Hz, 2H), 7.32 (d,  $J = 8.4$  Hz, 2H), 7.12 (d,  $J = 8.4$  Hz, 2H), 6.84 (d,  $J = 8.4$  Hz, 2H), 4.79 (s, 1H), 4.29 (q,  $J = 7.0$  Hz, 2H), 3.76 (s, 3H), 2.31 (s, 3H), 1.45 (t,  $J = 7.0$  Hz, 3H);  $^{13}\text{C NMR}$  (175 MHz,  $\text{CDCl}_3$ ):  $\delta$  198.1 183.3, 159.6, 138.2, 135.1, 130.2, 129.0, 128.2, 126.4, 113.7, 93.3, 78.9, 67.8, 55.2, 21.0, 14.2; HRMS-ESI+ calcd. for  $\text{C}_{20}\text{H}_{20}\text{O}_4$ : 324.1362; found: 324.1367

**Spectral data for 2-(3-bromophenyl)-5-ethoxy-2-(4-methoxyphenyl)furan-3(2H)-one (3f)**

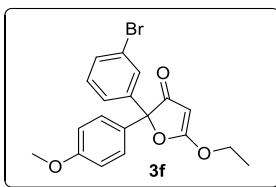

colorless oil, (45.8 mg, 0.117 mmol, 78%);  $^1\text{H NMR}$  (700 MHz,  $\text{CDCl}_3$ ):  $\delta$  7.62 (s, 1H), 7.62 ~ 7.40 (m, 2H), 7.33 (d,  $J = 9.1$  Hz, 2H), 7.19 (t,  $J = 7.7$  Hz, 1H), 6.85 (d,  $J = 9.1$  Hz, 2H), 4.80 (s, 1H), 4.32 ~ 4.29 (m, 2H), 3.77 (s, 3H), 1.47 (t,  $J = 7.0$  Hz, 3H);  $^{13}\text{C NMR}$  (175 MHz,  $\text{CDCl}_3$ ):  $\delta$  197.2 183.3, 159.8, 140.2, 131.4, 129.8, 129.6, 129.1, 128.2, 125.2, 122.4, 113.9, 93.1, 78.9, 68.2, 55.3, 14.2; HRMS-ESI+ calcd. for  $\text{C}_{19}\text{H}_{17}\text{BrO}_4$ : 388.0310; found: 388.0313

**Spectral data for 2-(3-chlorophenyl)-5-ethoxy-2-(4-methoxyphenyl)furan-3(2H)-one (3g)**

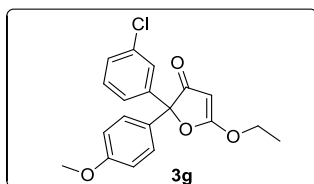

colorless oil, (45.1 mg, 0.130 mmol, 75%);  $^1\text{H NMR}$  (700 MHz,  $\text{CDCl}_3$ ):  $\delta$  7.47 (s, 1H), 7.46 ~ 7.34 (m, 3H), 7.28 ~ 7.24 (m, 2H), 6.85 (d,  $J = 9.1$  Hz, 2H), 4.80 (s, 1H), 4.32 ~ 4.29 (m, 2H), 3.77 (s, 3H), 1.47 (t,  $J = 7.0$  Hz, 3H);  $^{13}\text{C NMR}$  (175 MHz,  $\text{CDCl}_3$ ):  $\delta$  197.2 183.3, 159.8, 139.9, 134.3, 129.6, 129.5, 128.5, 128.2, 126.3, 124.7, 113.9, 93.2, 78.9, 68.2, 55.3, 14.2; HRMS-ESI+ calcd. for  $\text{C}_{19}\text{H}_{17}\text{ClO}_4$ : 344.0815; found: 344.0813

**Spectral data for 5-ethoxy-2-(4-methoxyphenyl)-2-(*m*-tolyl)furan-3(2H)-one (3h)**

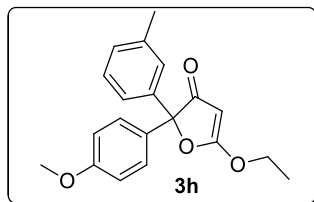

colorless oil, (48.7 mg, 0.150 mmol, 80%);  $^1\text{H NMR}$  (700 MHz,  $\text{CDCl}_3$ ):  $\delta$  7.35 (d,  $J = 9.1$  Hz, 2H), 7.25 (d,  $J = 9.1$  Hz, 2H), 7.20 (t,  $J = 7.7$  Hz, 1H), 7.10 (d,  $J = 7.0$  Hz, 1H), 6.83 (d,  $J = 9.1$  Hz, 2H), 4.79 (s, 1H), 4.28 (q,  $J = 7.0$  Hz, 2H), 3.76 (s, 3H), 2.30 (s, 3H), 1.45 (t,  $J = 7.0$  Hz, 3H);  $^{13}\text{C NMR}$  (175 MHz,  $\text{CDCl}_3$ ):  $\delta$  198.0 183.3, 159.6, 138.0, 137.9, 130.2, 129.1, 128.2, 128.1, 127.0, 123.5, 113.7, 94.3, 79.0, 67.9, 55.2, 21.4, 14.2; HRMS-ESI+ calcd. for  $\text{C}_{20}\text{H}_{20}\text{O}_4$ : 324.1362; found: 324.1364.

**Spectral data for 2-(2-bromophenyl)-5-ethoxy-2-(4-methoxyphenyl)furan-3(2H)-one (3i)**

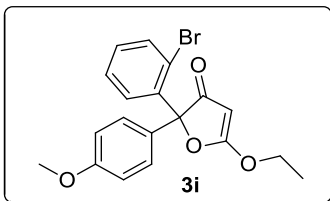

colorless oil, (50.2 mg, 0.128 mmol, 65%);  $^1\text{H NMR}$  (700 MHz,  $\text{CDCl}_3$ ):  $\delta$  7.65 (d,  $J = 7.7$  Hz, 1H), 7.60 (d,  $J = 8.4$  Hz, 1H), 7.28 (t,  $J = 7.7$  Hz, 1H), 7.21 ~ 7.16 (m, 3H), 6.84 (d,  $J = 9.1$  Hz, 2H), 4.83 (s, 1H), 4.35 (q,  $J = 7.0$  Hz, 2H), 3.76 (s, 3H), 1.47 (t,  $J = 7.0$  Hz, 3H);  $^{13}\text{C NMR}$  (175 MHz,  $\text{CDCl}_3$ ):  $\delta$  197.1, 183.5, 159.4, 135.5, 135.4, 130.9, 130.4, 128.9, 126.9, 126.8, 124.3, 113.7, 94.8, 79.3, 68.0, 55.2, 14.3; HRMS-ESI+ calcd. for  $\text{C}_{19}\text{H}_{17}\text{BrO}_4$ : 388.0310; found: 388.0308.

**Spectral data for 5-ethoxy-2-(4-methoxyphenyl)-2-(naphthalen-2-yl)furan-3(2H)-one (3j)**

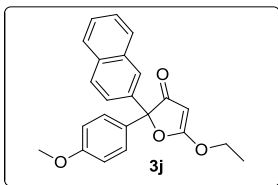

colorless oil, (37 mg, 0.102 mmol, 62%);  $^1\text{H NMR}$  (700 MHz,  $\text{CDCl}_3$ ):  $\delta$  7.99 (s, 1H), 7.82 ~ 7.78 (m, 3H), 7.51 (dd,  $J = 8.4, 1.4$  Hz, 1H), 7.47 ~ 7.45 (m, 2H), 7.38 (d,  $J = 9.1$  Hz, 2H), 6.85 (d,  $J = 8.4$  Hz, 2H), 4.85 (s, 1H), 4.32 (q,  $J = 7.0$  Hz, 2H), 3.77 (s, 3H), 1.48 (t,  $J = 7.0$  Hz, 3H);  $^{13}\text{C NMR}$  (175 MHz,  $\text{CDCl}_3$ ):  $\delta$  197.8, 183.4, 159.7, 135.2, 133.0, 132.7, 130.0, 128.4, 128.3, 128.2, 127.5, 126.5, 126.2, 125.4, 124.4, 113.8, 94.4, 79.1, 68.0, 55.2, 14.2; HRMS-ESI+ calcd. for  $\text{C}_{23}\text{H}_{20}\text{O}_4$ : 360.1362; found: 360.1364.

**Spectral data for 2-butyl-5-ethoxy-2-(4-methoxyphenyl)furan-3(2H)-one (3k)**

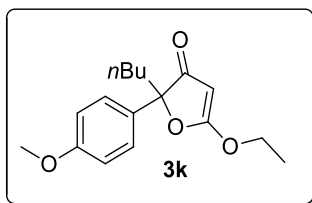

colorless oil, (28.1 mg, 0.089 mmol, 45%);  $^1\text{H NMR}$  (700 MHz,  $\text{CDCl}_3$ ):  $\delta$  7.44 (d,  $J = 9.1$  Hz, 2H), 6.85 (d,  $J = 9.1$  Hz, 2H), 4.68 (s, 1H), 4.27 (q,  $J = 5.6$  Hz, 2H), 3.77 (s, 3H), 2.03 (q,  $J = 11.2$  Hz, 2H), 1.46 (t,  $J = 7.0$  Hz, 3H), 1.30 ~ 1.23 (m, 4H), 0.84 (t,  $J = 7.0$  Hz, 3H);  $^{13}\text{C NMR}$  (175 MHz,  $\text{CDCl}_3$ ):  $\delta$  199.8, 183.3, 159.3, 129.6, 125.9, 113.7, 94.4, 79.0, 67.7, 55.2, 37.8, 25.3, 22.6, 14.2, 13.8; HRMS-ESI+ calcd. for  $\text{C}_{17}\text{H}_{22}\text{O}_4$ : 290.1518; found: 290.1516.

### Spectral data for 5-ethoxy-2-(4-methoxyphenyl)-2-methylfuran-3(2H)-one (3l)

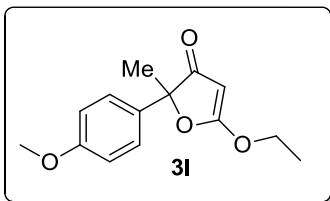

colorless oil, (40.5 mg, 0.163 mmol, 62%);  $^1\text{H NMR}$  (700 MHz,  $\text{CDCl}_3$ ):  $\delta$  7.41 (d,  $J = 8.4$  Hz, 2H), 6.86 (d,  $J = 9.1$  Hz, 2H), 4.70 (s, 1H), 4.29 (q,  $J = 7.0$  Hz, 2H), 3.77 (s, 3H), 1.75 (s, 3H), 1.45 (t,  $J = 7.0$  Hz, 3H);  $^{13}\text{C NMR}$  (175 MHz,  $\text{CDCl}_3$ ):  $\delta$  200.2, 183.1, 159.5, 129.9, 126.1, 113.8, 91.8, 77.9, 67.7, 55.2, 24.1, 14.2; HRMS-ESI+ calcd for  $\text{C}_{14}\text{H}_{16}\text{O}_4\text{Na}$  [ $\text{M}+\text{Na}$ ] $^+$ : 271.0946, found: 271.0948.

### Spectral data for 5-ethoxy-2,2-diphenylfuran-3(2H)-one (3m)

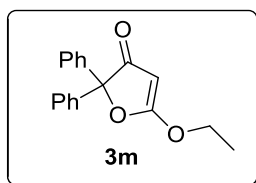

colorless oil, (47.3 mg, 0.168 mmol, 75%);  $^1\text{H NMR}$  (700 MHz,  $\text{CDCl}_3$ ):  $\delta$  7.47 (t,  $J = 7.7$  Hz, 4H), 7.34 ~ 7.29 (m, 6H), 4.81 (s, 1H), 4.30 (q,  $J = 7.0$  Hz, 2H), 1.46 (t,  $J = 7.0$  Hz, 3H);  $^{13}\text{C NMR}$  (175 MHz,  $\text{CDCl}_3$ ):  $\delta$  197.6, 183.4, 137.9, 128.4, 128.3, 126.5, 94.1, 79.0, 68.0, 14.2; HRMS-ESI+ calcd. for  $\text{C}_{18}\text{H}_{16}\text{O}_3$  ( $\text{M}+\text{Na}$ ): 280.1099; found: 280.1103.

### Spectral data for 5-ethoxy-2-phenyl-2-(p-tolyl)furan-3(2H)-one (3n)

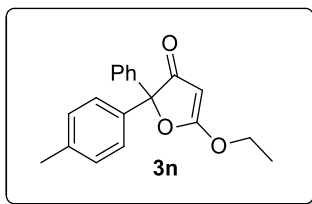

colorless oil, (51.7 mg, 0.175 mmol, 83%);  $^1\text{H NMR}$  (700 MHz,  $\text{CDCl}_3$ ):  $\delta$  7.47 (t,  $J = 8.4$  Hz, 2H), 7.35 ~ 7.33 (m, 2H), 7.32 ~ 7.29 (m, 3H), 7.13 (d,  $J = 7.7$  Hz, 2H), 4.80 (s, 1H), 4.29 (q,  $J = 7.0$  Hz, 2H), 2.31 (s, 3H), 1.46 (t,  $J = 7.0$  Hz, 3H);  $^{13}\text{C NMR}$  (175 MHz,  $\text{CDCl}_3$ ):  $\delta$  197.8, 183.4, 138.3, 137.9, 135.0, 129.0, 128.3, 126.6, 126.5, 94.2, 78.9, 67.9, 21.0, 14.2; HRMS-ESI+ calcd. for  $\text{C}_{19}\text{H}_{18}\text{O}_3$ : 294.1256; found: 294.1252

### Spectral data for 5-ethoxy-2-(4-fluorophenyl)-2-phenylfuran-3(2H)-one (3o)

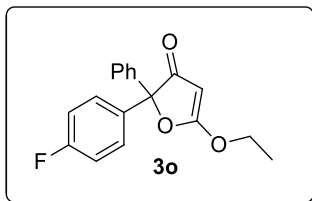

colorless oil, (50.9 mg, 0.170 mmol, 82%);  $^1\text{H}$  NMR (700 MHz,  $\text{CDCl}_3$ ):  $\delta$  7.48 ~ 7.44 (m, 4H), 7.34 ~ 7.30 (m, 3H), 7.01 (t,  $J = 8.4$  Hz, 2H), 4.81 (s, 1H), 4.30 (q,  $J = 7.0$  Hz, 2H), 1.47 (t,  $J = 7.0$  Hz, 3H);  $^{13}\text{C}$  NMR (175 MHz,  $\text{CDCl}_3$ ):  $\delta$  197.4 183.4, 163.4, 162.0, 137.7, 133.8, 128.6, 128.5, 128.4, 126.4, 115.3, 115.2, 93.5, 78.9, 68.1, 14.2;  $^{19}\text{F}$  NMR (500 MHz,  $\text{CDCl}_3$ ): -112.093; HRMS-EI+ calcd. for  $\text{C}_{18}\text{H}_{15}\text{FO}_3$ : 298.1005; found: 298.1003.

### Spectral data for 2-(4-chlorophenyl)-5-ethoxy-2-phenylfuran-3(2H)-one (3p)

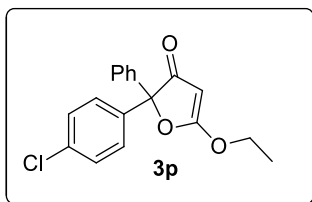

colorless oil, (53.4 mg, 0.169 mmol, 87%);  $^1\text{H}$  NMR (500 MHz,  $\text{CDCl}_3$ ):  $\delta$  7.45 ~ 7.42 (m, 4H), 7.34 ~ 7.29 (m, 5H), 4.80 (s, 1H), 4.30 (q,  $J = 5.5$  Hz, 2H), 1.47 (t,  $J = 5.0$  Hz, 3H);  $^{13}\text{C}$  NMR (125 MHz,  $\text{CDCl}_3$ ):  $\delta$  197.1, 183.4, 137.5, 136.4, 134.5, 128.6, 128.5, 128.4, 127.9, 126.5, 93.3, 78.9, 68.2, 14.2; HRMS-ESI+ calcd. for  $\text{C}_{18}\text{H}_{15}\text{ClO}_3$ : 314.0709; found: 314.0714.

### Spectral data for 5-ethoxy-2-phenyl-2-(m-tolyl)furan-3(2H)-one (3q)

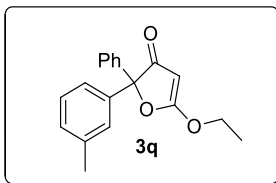

colorless oil, (49.2 mg, 0.167 mmol, 79%);  $^1\text{H}$  NMR (700 MHz,  $\text{CDCl}_3$ ):  $\delta$  7.46 (d,  $J = 7.0$  Hz, 2H), 7.33 ~ 7.30 (m, 3H), 7.27 (d,  $J = 14.0$  Hz, 2H), 7.22 (t,  $J = 7.0$  Hz, 1H), 7.12 (d,  $J = 7.7$  Hz, 1H), 4.80 (s, 1H), 4.30 (q,  $J = 7.7$  Hz, 2H), 2.30 (s, 3H), 1.47 (t,  $J = 7.7$  Hz, 3H);  $^{13}\text{C}$  NMR (175 MHz,  $\text{CDCl}_3$ ):  $\delta$  197.7 183.4, 138.0, 137.9, 137.8, 129.2, 128.4, 128.3, 128.2, 127.1, 126.5, 123.7, 94.2, 79.0, 68.0, 21.5, 14.2; HRMS-ESI+ calcd. for  $\text{C}_{19}\text{H}_{18}\text{O}_3$  (M+Na): 317.1153; found: 317.1145

### Spectral data for 2-(3-bromophenyl)-5-ethoxy-2-phenylfuran-3(2H)-one (3r)

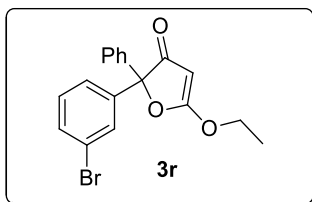

colorless oil, (44.7 mg, 0.124 mmol, 75%);  $^1\text{H NMR}$  (700 MHz,  $\text{CDCl}_3$ ):  $\delta$  7.64 (d,  $J = 7.0$  Hz, 1H), 7.45 ~ 7.43 (m, 4H), 7.34 ~ 7.31 (m, 3H), 7.19 (t,  $J = 7.7$  Hz, 1H), 4.80 (s, 1H), 4.31 (q,  $J = 7.0$  Hz, 2H), 1.47 (t,  $J = 7.0$  Hz, 3H);  $^{13}\text{C NMR}$  (175 MHz,  $\text{CDCl}_3$ ):  $\delta$  196.8 183.4, 140.0, 137.4, 131.5, 129.9, 129.2, 128.7, 128.5, 126.5, 125.3, 122.5, 93.0, 78.9, 68.3, 14.2; ; HRMS-ESI+ calcd. for  $\text{C}_{18}\text{H}_{15}\text{O}_3\text{Br}$  (M+Na): 381.0102; found: 381.0102.

### Spectral data for 5-ethoxy-2-(2-methoxyphenyl)-2-phenylfuran-3(2H)-one (3s)

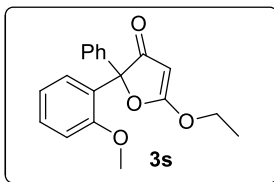

colorless oil, (46.1 mg, 0.148 mmol, 75%);  $^1\text{H NMR}$  (700 MHz,  $\text{CDCl}_3$ ):  $\delta$  7.51 (d,  $J = 7.0$  Hz, 2H), 7.35 ~ 7.29 (m, 4H), 7.02 (d,  $J = 9.1$  Hz, 1H), 6.88 (d,  $J = 7.7$  Hz, 1H), 6.84 (t,  $J = 7.7$  Hz, 1H), 4.79 (s, 1H), 4.27 (q,  $J = 7.0$  Hz, 2H), 3.64 (s, 3H), 1.45 (t,  $J = 7.0$  Hz, 3H);  $^{13}\text{C NMR}$  (175 MHz,  $\text{CDCl}_3$ ):  $\delta$  198.8 183.1, 158.9, 137.4, 131.0, 130.8, 128.0, 127.9, 126.1, 125.7, 120.3, 112.3, 93.2, 78.2, 67.6, 55.7, 14.2; ; HRMS-ESI+ calcd. for  $\text{C}_{19}\text{H}_{18}\text{O}_4$ : 310.1205; found: 310.1207.

### Spectral data for 2-butyl-5-ethoxy-2-phenylfuran-3(2H)-one (3t)

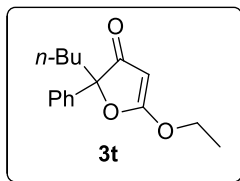

colorless oil, (9.7 mg, 0.037 mmol, 15%);  $^1\text{H NMR}$  (700 MHz,  $\text{CDCl}_3$ ):  $\delta$  7.53 (t,  $J = 7.0$  Hz, 2H), 7.33 (t,  $J = 7.0$  Hz, 2H), 7.27 (d,  $J = 7.0$  Hz, 1H), 4.68 (s, 1H), 4.31 ~ 4.26 (m, 2H), 2.11 ~ 2.03 (m, 2H), 1.47 (t,  $J = 7.0$  Hz, 3H), 1.31 ~ 1.28 (m, 4H), 0.85 (t,  $J = 7.0$  Hz, 3H);  $^{13}\text{C NMR}$  (175 MHz,  $\text{CDCl}_3$ ):  $\delta$  199.4, 183.4, 137.4, 128.3, 127.9, 124.5, 94.4, 78.7, 67.8 38.0, 25.3, 22.5, 14.2, 13.8; ; HRMS-ESI+ calcd. for  $\text{C}_{16}\text{H}_{20}\text{O}_3$ : 260.1412; found: 260.1411.



### Spectral data for 5-ethoxy-2-ethyl-2-phenylfuran-3(2H)-one (3u)

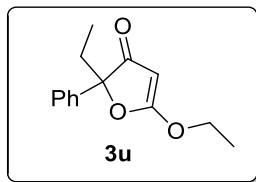

colorless oil, (6.7 mg, 0.028 mmol, 10%);  $^1\text{H NMR}$  (700 MHz,  $\text{CDCl}_3$ ):  $\delta$  7.52 (d,  $J = 8.4$  Hz, 2H), 7.33 (t,  $J = 7.0$  Hz, 2H), 7.27 (t,  $J = 7.0$  Hz, 1H), 4.70 (s, 1H), 4.30 ~ 4.27 (m, 2H), 2.12 (q,  $J = 7.7$  Hz, 2H), 1.47 (t,  $J = 7.0$  Hz, 3H), 0.87 (t,  $J = 7.0$  Hz, 3H);  $^{13}\text{C NMR}$  (175 MHz,  $\text{CDCl}_3$ ):  $\delta$  199.3, 183.5, 137.2, 128.3, 127.9, 124.5, 94.7, 78.9, 67.8 31.3, 14.2, 7.73; ; HRMS-ESI+ calcd. for  $\text{C}_{14}\text{H}_{16}\text{O}_3$ : 232.1099; found: 232.1095.

### Spectral data for 2-(4-methoxyphenyl)-5-phenoxy-2-phenylfuran-3(2H)-one (4b)

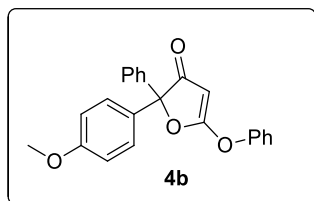

colorless oil, (63.2 mg, 0.176 mmol, 89%);  $^1\text{H NMR}$  (700 MHz,  $\text{CDCl}_3$ ):  $\delta$  7.15 (t,  $J = 7.0$  Hz, 2H), 7.42 ~ 7.40 (m, 4H), 7.33 ~ 7.31 (m, 4H), 7.21 (d,  $J = 8.4$  Hz, 2H), 6.87 (d,  $J = 8.4$  Hz, 2H), 4.63 (s, 1H), 3.78 (s, 3H);  $^{13}\text{C NMR}$  (175 MHz,  $\text{CDCl}_3$ ):  $\delta$  197.7, 183.6, 159.8, 152.3, 137.8, 130.1, 129.9, 128.4, 128.3, 128.2, 127.2, 126.3, 120.3, 113.8, 95.2, 80.9, 55.2; HRMS-ESI+ calcd. for  $\text{C}_{23}\text{H}_{18}\text{O}_4$  (M+Na): 381.1102; found: 381.1103

### Spectral data for 5-(allyloxy)-2-(4-methoxyphenyl)-2-phenylfuran-3(2H)-one (4c)

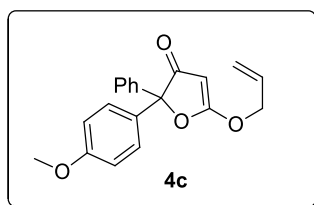

colorless oil, (44.7 mg, 0.138 mmol, 70%);  $^1\text{H NMR}$  (500 MHz,  $\text{CDCl}_3$ ):  $\delta$  7.45 (t,  $J = 7.0$  Hz, 2H), 7.35 (d,  $J = 8.5$  Hz, 2H), 7.40 ~ 7.30 (m, 3H), 6.84 (d,  $J = 9.0$  Hz, 2H), 6.02 ~ 5.94 (m, 1H), 5.41 (q,  $J = 7.5$  Hz, 2H), 4.82 (s, 1H), 4.73 (d,  $J = 5.5$  Hz, 2H), 3.77 (s, 3H);  $^{13}\text{C NMR}$  (175 MHz,  $\text{CDCl}_3$ ):  $\delta$  198.0, 183.2, 159.7, 137.8, 130.0, 129.9, 128.6, 128.4, 128.1, 127.1, 126.4, 120.6, 113.7, 94.6, 79.5, 55.2; HRMS-ESI+ calcd. for  $\text{C}_{20}\text{H}_{18}\text{O}_4$  (M+Na): 345.1102; found: 345.1104

### Spectral data for 2-(4-methoxyphenyl)-2-phenyl-5-propoxyfuran-3(2H)-one (4d)

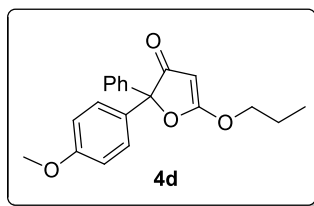

colorless oil, (47.6 mg, 0.146 mmol, 74%);  $^1\text{H NMR}$  (500 MHz,  $\text{CDCl}_3$ ):  $\delta$  7.46 (d,  $J = 8.0$  Hz, 2H), 7.36 (d,  $J = 8.5$  Hz, 2H), 7.34 ~ 7.29 (m, 3H), 6.85 (d,  $J = 9.0$  Hz, 2H), 4.81 (s, 1H), 4.18 (t,  $J = 6.5$  Hz, 2H), 3.77 (s, 3H), 1.87 ~ 1.80 (m, 2H), 1.02 (t, 7.5 Hz, 3H);  $^{13}\text{C NMR}$  (175 MHz,  $\text{CDCl}_3$ ):  $\delta$  197.9, 183.5, 159.6, 137.9, 130.1, 128.3, 128.3, 128.3, 126.4, 113.7, 94.2, 79.0, 73.4, 55.2, 22.0, 10.1; HRMS-ESI+ calcd. for  $\text{C}_{20}\text{H}_{20}\text{O}_4$  (M+Na): 347.1259; found: 347.1260

### Spectral data for 5-butoxy-2-(4-methoxyphenyl)-2-phenylfuran-3(2H)-one (4e)

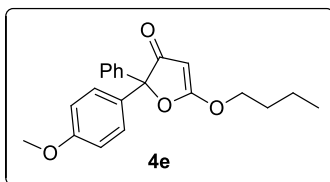

colorless oil, (49 mg, 0.144 mmol, 73%);  $^1\text{H NMR}$  (700 MHz,  $\text{CDCl}_3$ ):  $\delta$  7.45 (d,  $J = 7.7$  Hz, 2H), 7.36 (d,  $J = 8.4$  Hz, 2H), 7.33 ~ 7.28 (m, 3H), 6.84 (d,  $J = 8.4$  Hz, 2H), 4.80 (s, 1H), 4.23 (t,  $J = 7.0$  Hz, 2H), 3.77 (s, 3H), 1.81 ~ 1.77 (m, 2H), 1.49 ~ 1.44 (m, 2H), 0.95 (t,  $J = 7.0$  Hz, 3H);  $^{13}\text{C NMR}$  (175 MHz,  $\text{CDCl}_3$ ):  $\delta$  197.9, 183.5, 159.6, 138.0, 130.1, 128.3, 128.3, 128.2, 126.4, 113.7, 94.2, 79.0, 71.8, 55.2, 30.5, 18.7, 13.5; HRMS-ESI+ calcd. for  $\text{C}_{21}\text{H}_{22}\text{O}_4$  (M+Na): 361.1415; found: 361.1415

### Spectral data for 5-(cyclohexyloxy)-2-(4-methoxyphenyl)-2-phenylfuran-3(2H)-one (4f)

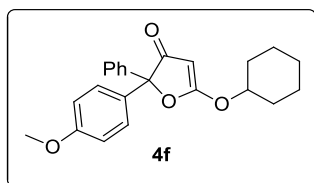

colorless oil, (58.5 mg, 0.160 mmol, 81%);  $^1\text{H NMR}$  (500 MHz,  $\text{CDCl}_3$ ):  $\delta$  7.45 (d,  $J = 7.0$  Hz, 2H), 7.36 (d,  $J = 9.0$  Hz, 2H), 7.34 ~ 7.28 (m, 3H), 6.84 (d,  $J = 9.0$  Hz, 2H), 4.78 (s, 1H), 4.51 ~ 4.46 (m, 1H), 3.76 (s, 3H), 1.99 ~ 1.97 (m, 2H), 1.80 ~ 1.87 (m, 2H), 1.68 ~ 1.61 (m, 2H), 1.56 ~ 1.53 (m, 1H), 1.41 ~ 1.30 (m, 3H);  $^{13}\text{C NMR}$  (175 MHz,  $\text{CDCl}_3$ ):  $\delta$  197.9, 182.7, 159.6, 138.1, 130.2, 128.3, 128.2, 126.4, 113.7, 93.8, 81.3, 79.3, 55.2, 31.3, 31.3, 24.9, 23.1; HRMS-ESI+ calcd. for  $\text{C}_{23}\text{H}_{24}\text{O}_4$  (M+Na): 387.1572; found: 387.1578

### Spectral data for 5-(benzyloxy)-2-(4-methoxyphenyl)-2-phenylfuran-3(2H)-one (4g)

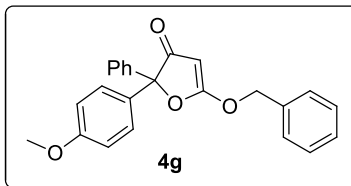

colorless oil, (45.1 mg, 0.121 mmol, 61%);  $^1\text{H}$  NMR (500 MHz,  $\text{CDCl}_3$ ):  $\delta$  7.43 ~ 7.41 (m, 2H), 7.41 ~ 7.38 (m, 5H), 7.34 ~ 7.30 (m, 5H), 6.84 (d,  $J = 9.0$  Hz, 2H), 4.78 (s, 1H), 5.26 (s, 2H), 5.90 (s, 1H), 3.77 (s, 3H);  $^{13}\text{C}$  NMR (175 MHz,  $\text{CDCl}_3$ ):  $\delta$  197.9, 183.1, 159.7, 137.8, 133.4, 130.0, 129.2, 128.9, 128.4, 128.3, 128.3, 128.1, 126.4, 113.7, 94.7, 79.9, 73.2, 55.3; HRMS-ESI+ calcd. for  $\text{C}_{24}\text{H}_{20}\text{O}_4$  (M+Na): 395.1259; found: 395.1261

### Spectral data for 5-isopropoxy-2-(4-methoxyphenyl)-2-(4-nitrophenyl)furan-3(2H)-one (4h)

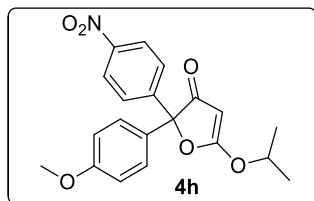

White Solid, (54.7 mg, 0.148 mmol, 88%);  $^1\text{H}$  NMR (700 MHz,  $\text{CDCl}_3$ ):  $\delta$  8.17 (d,  $J = 8.4$  Hz, 2H), 7.68 (d,  $J = 8.4$  Hz, 2H), 7.33 (d,  $J = 8.4$  Hz, 2H), 6.85 (d,  $J = 8.4$  Hz, 2H), 4.80 (s, 1H), 4.75 (m, 1H), 3.77 (s, 3H), 1.45 (d,  $J = 3.5$  Hz, 3H), 1.44 (d,  $J = 3.5$  Hz, 3H);  $^{13}\text{C}$  NMR (175 MHz,  $\text{CDCl}_3$ ):  $\delta$  196.3, 182.7, 160.0, 147.6, 145.0, 129.4, 128.3, 127.0, 123.4, 114.0, 92.6, 79.2, 76.8, 55.3, 21.8, 21.8; ; HRMS-ESI+ calcd. for  $\text{C}_{20}\text{H}_{21}\text{O}_6$  (M+Na): 369.1212; found: 369.1218.

### Spectral data for 2-(4-methoxyphenyl)-2,5-diphenylfuran-3(2H)-one (4i)

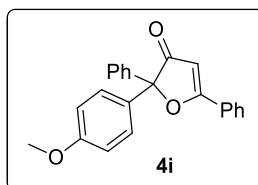

colorless oil, (30.3 mg, 0.088 mmol, 55%);  $^1\text{H}$  NMR (400 MHz,  $\text{CDCl}_3$ ):  $\delta$  7.95 – 7.92 (m, 2H), 7.57 – 7.55 (m, 1H), 7.52 – 7.48 (m, 4H), 7.44 – 7.41 (m, 2H), 7.36 – 7.30 (m, 3H), 6.87 (dd,  $J_1 = 6.8$  Hz,  $J_2 = 1.6$  Hz, 1H), 6.07 (s, 1H), 3.77 (s, 3H);  $^{13}\text{C}$  NMR (100 MHz,  $\text{CDCl}_3$ ):  $\delta$  202.4, 184.0, 159.6, 138.4, 132.9, 130.6, 128.9, 128.7, 128.3, 128.2, 127.2, 126.5, 113.8, 99.7, 93.0, 55.2; HRMS-ESI+ calcd for  $\text{C}_{23}\text{H}_{18}\text{O}_3\text{Na}$  [M+Na] $^+$ : 365.1153, found: 365.1151.

### Spectral data for 2,2-diphenyltetrahydrofuran-3-ol (5)

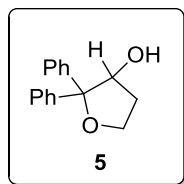

White solid, (11.3 mg, 0.047 mmol, 49%);  $^1\text{H}$  NMR (700 MHz,  $\text{CDCl}_3$ ):  $\delta$  7.50 (t,  $J = 8.4$  Hz, 4H), 7.32 ~ 7.22 (m, 4H), 7.21 ~ 7.19 (m, 2H), 4.96 (s, 1H), 4.28 (q,  $J = 7.7$  Hz, 1H), 3.97 (q,  $J = 7.0$  Hz, 1H), 2.07 ~ 2.05 (m, 2H), 1.52 (bs, 1H);  $^{13}\text{C}$  NMR (175 MHz,  $\text{CDCl}_3$ ):  $\delta$  143.9, 141.4, 128.7, 128.5, 128.4, 128.3, 127.2, 127.1, 126.5, 125.5, 90.9, 76.3, 65.1, 33.3; HRMS-ESI+ calcd. for  $\text{C}_{16}\text{H}_{16}\text{O}_2$  (M+Na): 263.1048; found: 263.1053

### Spectral data for 2-(4-chlorophenyl)-5-methyl-2-phenylfuran-3(2H)-one (6)

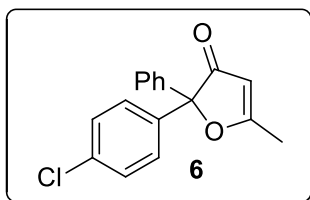

colorless oil, (12.2 mg, 0.042 mmol, 45%);  $^1\text{H}$  NMR (500 MHz,  $\text{CDCl}_3$ ):  $\delta$  7.38 ~ 7.32 (m, 4H), 7.31 ~ 7.23 (m, 5H), 5.48 (s, 1H), 2.35 (s, 3H);  $^{13}\text{C}$  NMR (125 MHz,  $\text{CDCl}_3$ ):  $\delta$  202.1, 189.0, 137.8, 136.7, 134.4, 128.6, 128.5, 128.5, 127.9, 126.4, 103.3, 92.3, 17.0; HRMS-ESI+ calcd. for  $\text{C}_{17}\text{H}_{13}\text{O}_2\text{Cl}$ : 284.0604; found: 284.0607

### Spectral data for (2R,3S)-2-phenyl-2-(p-tolyl)tetrahydrofuran-3-ol (7a)

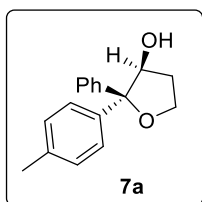

White solid, (21 mg, 0.077 mol, 40%)  $^1\text{H}$  NMR (700 MHz,  $\text{CDCl}_3$ ):  $\delta$  7.48 (d,  $J = 8.4$  Hz, 2H), 7.37 (d,  $J = 8.4$  Hz, 2H), 7.30 (t,  $J = 8.4$  Hz, 2H), 7.19 (t,  $J = 7.0$  Hz, 1H), 7.11 (d,  $J = 8.4$  Hz, 2H), 4.95 ~ 4.93 (m, 1H), 4.25 (q,  $J = 7.7$  Hz, 1H), 3.97 ~ 3.93 (m, 1H), 2.28 (d,  $J = 8.4$  Hz, 3H), 2.08 ~ 2.04 (m, 2H);  $^{13}\text{C}$  NMR (175 MHz,  $\text{CDCl}_3$ ):  $\delta$  141.6, 141.0, 136.8, 129.2, 129.1, 128.4, 128.4, 127.1, 126.5, 126.4, 125.4, 125.4, 90.9, 76.2, 65.1, 33.4, 20.9; HRMS-ESI+ calcd. for  $\text{C}_{17}\text{H}_{18}\text{O}_2$  (M+Na): 277.1204; found: 277.1219

**Spectral data for (2*R*,3*R*)-2-phenyl-2-(*p*-tolyl)tetrahydrofuran-3-ol (7b)**

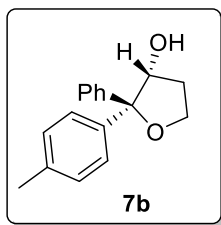

colorless oil, (8 mg, 0.029 mmol, 15%); <sup>1</sup>H NMR (700 MHz, CDCl<sub>3</sub>): δ 7.49 (d, *J* = 7.7 Hz, 2H), 7.37 (d, *J* = 7.7 Hz, 2H), 7.30 (t, *J* = 7.7 Hz, 2H), 7.20 (t, *J* = 7.0 Hz, 1H), 7.11 (d, *J* = 7.7 Hz, 2H), 4.94 (d, *J* = 2.8 Hz, 1H), 4.26 (q, *J* = 7.7 Hz, 1H), 3.95 (q, *J* = 7.7 Hz, 1H), 2.28 (d, *J* = 8.4 Hz, 3H), 2.06 ~ 2.04 (m, 2H); <sup>13</sup>C NMR (175 MHz, CDCl<sub>3</sub>): δ 144.1, 138.4, 136.9, 129.2, 129.1, 128.4, 128.4, 127.0, 126.4, 126.4, 125.4, 125.4, 90.9, 76.2, 65.1, 33.3, 20.9; HRMS-ESI<sup>+</sup> calcd. for C<sub>17</sub>H<sub>18</sub>O<sub>2</sub> (M+Na): 277.1204; found: 277.1203.

**Spectral data for (3*S*,4*R*)-3-(4-methoxyphenyl)-1,3,4-triphenylazetididin-2-one (8a)**

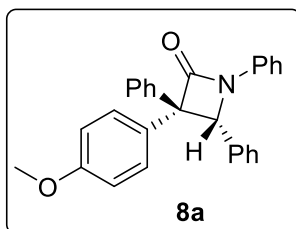

White solid, (37.8 mg, 0.093 mmol, 47%); <sup>1</sup>H NMR (500 MHz, CDCl<sub>3</sub>): δ 7.55 (d, *J* = 8.5 Hz, 2H), 7.38 (d, *J* = 8.0 Hz, 2H), 7.23 (t, *J* = 7.5 Hz, 2H), 7.11 (s, 5H), 7.11 (d, *J* = 8.0 Hz, 2H), 7.04 ~ 6.97 (m, 4H), 6.89 (d, *J* = 7.0 Hz, 2H), 5.74 (s, 1H), 3.77 (s, 3H); <sup>13</sup>C NMR (175 MHz, CDCl<sub>3</sub>): δ 167.3, 158.8, 137.5, 137.4, 134.9, 132.8, 129.0, 128.4, 128.3, 128.3, 128.0, 127.8, 127.5, 126.6, 124.0, 117.4, 114.1, 71.7, 67.3, 55.3; HRMS-ESI<sup>+</sup> calcd. for C<sub>28</sub>H<sub>23</sub>NO<sub>2</sub> (M+Na): 428.1626; found: 428.1626.

**Spectral data for (3*S*,4*S*)-3-(4-methoxyphenyl)-1,3,4-triphenylazetididin-2-one (8b)**

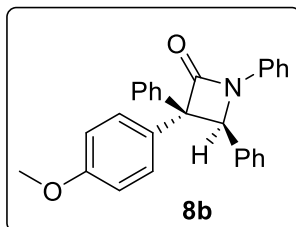

White solid, (16 mg, 0.039 mmol, 20%);  $^1\text{H NMR}$  (500 MHz,  $\text{CDCl}_3$ ):  $\delta$  6.62 (d,  $J = 7.5$  Hz, 2H), 7.36 (t,  $J = 8.5$  Hz, 4H), 7.27 ~ 7.21 (m, 4H), 7.12 (s, 5H), 7.04 ~ 6.99 (m, 3H), 6.52 (d,  $J = 8.5$  Hz, 2H), 5.76 (s, 1H), 3.63 (s, 3H);  $^{13}\text{C NMR}$  (175 MHz,  $\text{CDCl}_3$ ):  $\delta$  167.3, 158.2, 141.0, 137.5, 134.9, 129.5, 129.3, 129.0, 128.7, 128.3, 128.1, 127.5, 127.3, 127.2, 124.0, 117.4, 113.2, 71.7, 67.1, 55.0; HRMS-ESI+ calcd. for  $\text{C}_{28}\text{H}_{23}\text{NO}_2$  (M+Na): 428.1626; found: 428.1626.

### Spectral data for benzyl 2-(4-methoxyphenyl)-2-phenylacetate (**8c**)

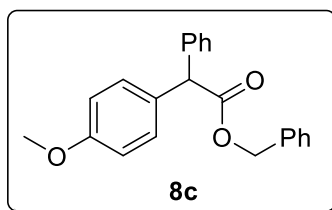

colorless oil, (47 mg, 0.141 mmol, 72%);  $^1\text{H NMR}$  (500 MHz,  $\text{CDCl}_3$ ):  $\delta$  7.48 ~ 7.36 (m, 10H), 7.34 (d,  $J = 8.5$  Hz, 2H), 6.95 (d,  $J = 9.0$  Hz, 2H), 5.29 (s, 2H), 5.14 (s, 1H), 3.89 (s, 3H);  $^{13}\text{C NMR}$  (125 MHz,  $\text{CDCl}_3$ ):  $\delta$  172.5, 158.7, 138.8, 135.6, 130.6, 129.6, 128.5, 128.4, 128.4, 128.1, 128.1, 127.1, 113.9, 66.8, 56.1, 55.2; HRMS-ESI+ calcd. for  $\text{C}_{22}\text{H}_{20}\text{O}_3$  (M+Na): 428.1626; found: 428.1626.

## 6. NOE of compound 3a'

| Irradite                          | Enhancements                                                                        |
|-----------------------------------|-------------------------------------------------------------------------------------|
| H <sup>a</sup> ( $\delta$ , 1.11) | H <sup>b</sup> ( $\delta$ , 4.08, 1.32%)                                            |
| H <sup>b</sup> ( $\delta$ , 4.08) | H <sup>a</sup> ( $\delta$ , 1.11, 0.89%)                                            |
| H <sup>c</sup> ( $\delta$ , 6.16) | H <sup>d</sup> ( $\delta$ , 7.90, 0.83%)                                            |
| H <sup>d</sup> ( $\delta$ , 7.90) | H <sup>c</sup> ( $\delta$ , 6.16, 0.51%), H <sup>e</sup> ( $\delta$ , 6.89, 2.22%), |
| H <sup>e</sup> ( $\delta$ , 6.89) | H <sup>d</sup> ( $\delta$ , 7.90, 2.53%)                                            |
| H <sup>f</sup> ( $\delta$ , 7.32) | H <sup>g</sup> ( $\delta$ , 7.38, 1.82%)                                            |

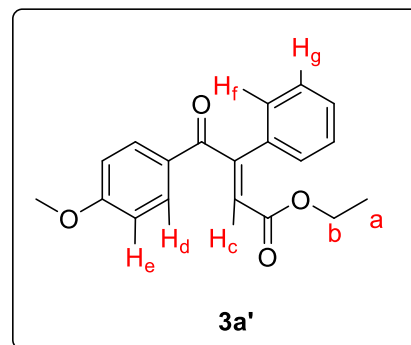

## 7. X-ray crystallographic data of compound 4h

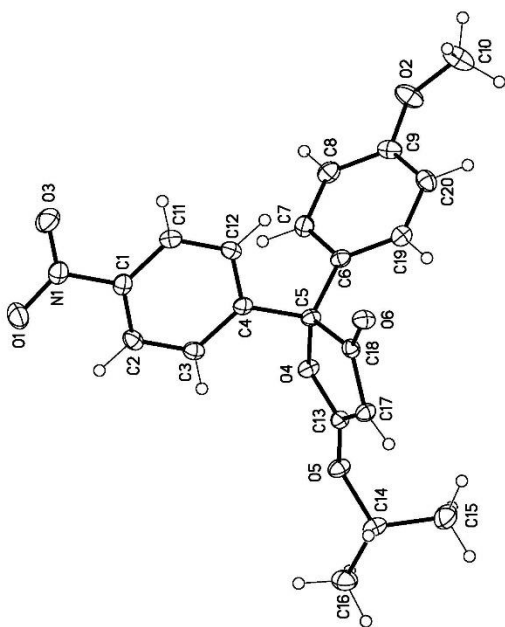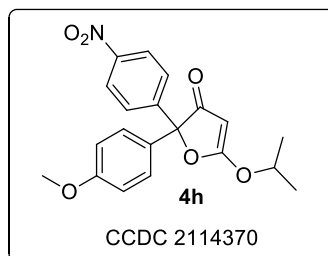

Ellipsoid contour % probability level = 50%

Experimental: The sample was dissolved in appropriate amount of dichloromethane followed by the addition of pentane to furnish a saturated solution. Afterwards, the mixture was allowed to stand at room temperature to form the crystals.

**Table 1. Crystal data and structure refinement for 210951LT\_0M.**

|                      |                                                  |                 |
|----------------------|--------------------------------------------------|-----------------|
| Identification code  | 210951lt_0m                                      |                 |
| Empirical formula    | C <sub>20</sub> H <sub>19</sub> N O <sub>6</sub> |                 |
| Formula weight       | 369.36                                           |                 |
| Temperature          | 100(2) K                                         |                 |
| Wavelength           | 0.71073 Å                                        |                 |
| Crystal system       | Triclinic                                        |                 |
| Space group          | P-1                                              |                 |
| Unit cell dimensions | a = 6.4622(4) Å                                  | α = 86.413(3)°. |
|                      | b = 10.4948(8) Å                                 | β = 89.241(3)°. |
|                      | c = 14.1200(10) Å                                | γ = 73.335(3)°. |



|                                   |                                             |
|-----------------------------------|---------------------------------------------|
| Volume                            | 915.58(11) Å <sup>3</sup>                   |
| Z                                 | 2                                           |
| Density (calculated)              | 1.340 Mg/m <sup>3</sup>                     |
| Absorption coefficient            | 0.100 mm <sup>-1</sup>                      |
| F(000)                            | 388                                         |
| Crystal size                      | 0.18 x 0.06 x 0.06 mm <sup>3</sup>          |
| Theta range for data collection   | 2.029 to 26.433°.                           |
| Index ranges                      | -8<=h<=7, -13<=k<=13, -17<=l<=17            |
| Reflections collected             | 13572                                       |
| Independent reflections           | 3726 [R(int) = 0.0240]                      |
| Completeness to theta = 25.242°   | 99.2 %                                      |
| Absorption correction             | Semi-empirical from equivalents             |
| Max. and min. transmission        | 0.7454 and 0.7164                           |
| Refinement method                 | Full-matrix least-squares on F <sup>2</sup> |
| Data / restraints / parameters    | 3726 / 0 / 247                              |
| Goodness-of-fit on F <sup>2</sup> | 1.040                                       |
| Final R indices [I>2sigma(I)]     | R1 = 0.0358, wR2 = 0.0860                   |
| R indices (all data)              | R1 = 0.0415, wR2 = 0.0897                   |
| Extinction coefficient            | n/a                                         |
| Largest diff. peak and hole       | 0.356 and -0.245 e.Å <sup>-3</sup>          |

## X-ray crystallographic data of compound 5

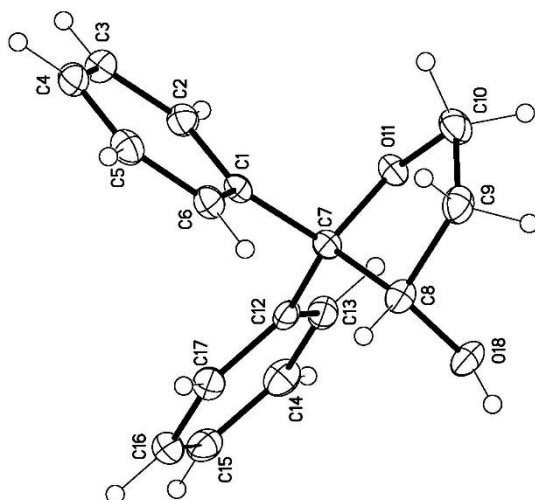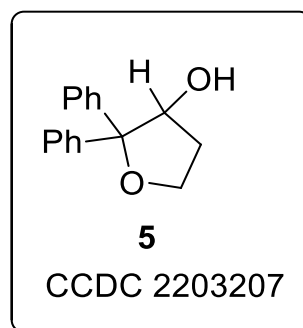

Ellipsoid contour % probability level = 50%

Experimental: The sample was dissolved in appropriate amount of dichloromethane followed by the addition of pentane to furnish a saturated solution. Afterwards, the mixture was allowed to stand at room temperature to form the crystals.

**Table 2 Crystal data and structure refinement for 220747lt\_auto.**

|                     |                                                |
|---------------------|------------------------------------------------|
| Identification code | 220747lt_auto                                  |
| Empirical formula   | C <sub>16</sub> H <sub>16</sub> O <sub>2</sub> |
| Formula weight      | 240.29                                         |
| Temperature/K       | 100.01(10)                                     |
| Crystal system      | monoclinic                                     |
| Space group         | P2 <sub>1</sub> /c                             |
| a/Å                 | 11.41961(18)                                   |

|                                             |                                                               |
|---------------------------------------------|---------------------------------------------------------------|
| b/Å                                         | 5.65053(12)                                                   |
| c/Å                                         | 19.2947(3)                                                    |
| $\alpha$ /°                                 | 90                                                            |
| $\beta$ /°                                  | 101.7637(17)                                                  |
| $\gamma$ /°                                 | 90                                                            |
| Volume/Å <sup>3</sup>                       | 1218.88(4)                                                    |
| Z                                           | 4                                                             |
| $\rho_{\text{calc}}$ /cm <sup>3</sup>       | 1.309                                                         |
| $\mu$ /mm <sup>-1</sup>                     | 0.675                                                         |
| F(000)                                      | 512.0                                                         |
| Crystal size/mm <sup>3</sup>                | 0.13 × 0.12 × 0.1                                             |
| Radiation                                   | Cu K $\alpha$ ( $\lambda$ = 1.54184)                          |
| 2 $\Theta$ range for data collection/°      | 7.908 to 134.154                                              |
| Index ranges                                | -10 ≤ h ≤ 13, -6 ≤ k ≤ 5, -22 ≤ l ≤ 23                        |
| Reflections collected                       | 8591                                                          |
| Independent reflections                     | 2167 [R <sub>int</sub> = 0.0186, R <sub>sigma</sub> = 0.0179] |
| Data/restraints/parameters                  | 2167/0/165                                                    |
| Goodness-of-fit on F <sup>2</sup>           | 1.070                                                         |
| Final R indexes [I ≥ 2 $\sigma$ (I)]        | R <sub>1</sub> = 0.0322, wR <sub>2</sub> = 0.0796             |
| Final R indexes [all data]                  | R <sub>1</sub> = 0.0345, wR <sub>2</sub> = 0.0813             |
| Largest diff. peak/hole / e Å <sup>-3</sup> | 0.23/-0.18                                                    |

## X-ray crystallographic data of compound 7a

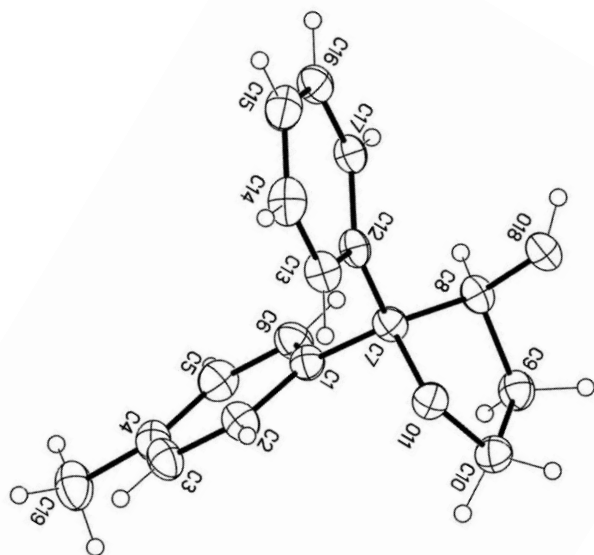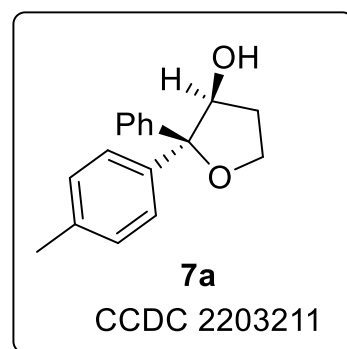

Ellipsoid contour % probability level = 50%

Experimental: The sample was dissolved in appropriate amount of dichloromethane followed by the addition of pentane to furnish a saturated solution. Afterwards, the mixture was allowed to stand at room temperature to form the crystals.

**Table 3 Crystal data and structure refinement for 220784lt\_auto.**

|                     |                                                |
|---------------------|------------------------------------------------|
| Identification code | 220784lt_auto                                  |
| Empirical formula   | C <sub>34</sub> H <sub>36</sub> O <sub>4</sub> |
| Formula weight      | 508.63                                         |

|                                             |                                                                |
|---------------------------------------------|----------------------------------------------------------------|
| Temperature/K                               | 99.99(10)                                                      |
| Crystal system                              | triclinic                                                      |
| Space group                                 | P-1                                                            |
| a/Å                                         | 5.94355(19)                                                    |
| b/Å                                         | 13.5482(4)                                                     |
| c/Å                                         | 17.6441(5)                                                     |
| $\alpha$ /°                                 | 75.901(3)                                                      |
| $\beta$ /°                                  | 80.614(3)                                                      |
| $\gamma$ /°                                 | 79.208(3)                                                      |
| Volume/Å <sup>3</sup>                       | 1343.28(8)                                                     |
| Z                                           | 2                                                              |
| $\rho_{\text{calc}}/\text{cm}^3$            | 1.258                                                          |
| $\mu/\text{mm}^{-1}$                        | 0.640                                                          |
| F(000)                                      | 544.0                                                          |
| Crystal size/mm <sup>3</sup>                | 0.16 × 0.07 × 0.02                                             |
| Radiation                                   | Cu K $\alpha$ ( $\lambda$ = 1.54184)                           |
| 2 $\Theta$ range for data collection/°      | 5.204 to 134.152                                               |
| Index ranges                                | -7 ≤ h ≤ 5, -16 ≤ k ≤ 16, -21 ≤ l ≤ 21                         |
| Reflections collected                       | 15811                                                          |
| Independent reflections                     | 4759 [ $R_{\text{int}}$ = 0.0297, $R_{\text{sigma}}$ = 0.0310] |
| Data/restraints/parameters                  | 4759/0/348                                                     |
| Goodness-of-fit on F <sup>2</sup>           | 1.043                                                          |
| Final R indexes [ $I \geq 2\sigma(I)$ ]     | $R_1$ = 0.0407, $wR_2$ = 0.1038                                |
| Final R indexes [all data]                  | $R_1$ = 0.0505, $wR_2$ = 0.1088                                |
| Largest diff. peak/hole / e Å <sup>-3</sup> | 0.21/-0.24                                                     |

## X-ray crystallographic data of compound **8b**

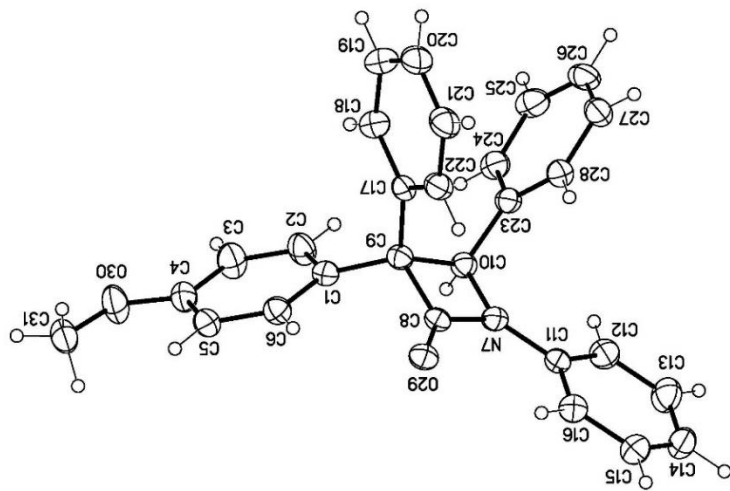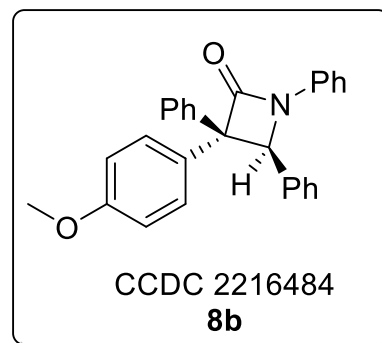

**Table 1** Crystal data and structure refinement for 2210100LT\_auto.

|                     |                                                 |
|---------------------|-------------------------------------------------|
| Identification code | 2210100LT_auto                                  |
| Empirical formula   | C <sub>28</sub> H <sub>23</sub> NO <sub>2</sub> |
| Formula weight      | 405.47                                          |
| Temperature/K       | 100.00(11)                                      |
| Crystal system      | orthorhombic                                    |
| Space group         | Pbca                                            |
| a/Å                 | 13.66639(16)                                    |
| b/Å                 | 17.3063(2)                                      |
| c/Å                 | 18.4966(2)                                      |
| $\alpha$ /°         | 90                                              |

|                                               |                                                                     |
|-----------------------------------------------|---------------------------------------------------------------------|
| $\beta/^\circ$                                | 90                                                                  |
| $\gamma/^\circ$                               | 90                                                                  |
| Volume/ $\text{\AA}^3$                        | 4374.70(9)                                                          |
| Z                                             | 8                                                                   |
| $\rho_{\text{calc}}/\text{g}/\text{cm}^3$     | 1.231                                                               |
| $\mu/\text{mm}^{-1}$                          | 0.606                                                               |
| F(000)                                        | 1712.0                                                              |
| Crystal size/ $\text{mm}^3$                   | $0.09 \times 0.03 \times 0.02$                                      |
| Radiation                                     | Cu $K\alpha$ ( $\lambda = 1.54184$ )                                |
| $2\Theta$ range for data collection/ $^\circ$ | 9.532 to 134.156                                                    |
| Index ranges                                  | $-16 \leq h \leq 15$ , $-20 \leq k \leq 20$ , $-22 \leq l \leq 21$  |
| Reflections collected                         | 26604                                                               |
| Independent reflections                       | 3913 [ $R_{\text{int}} = 0.0251$ ,<br>$R_{\text{sigma}} = 0.0179$ ] |
| Data/restraints/parameters                    | 3913/0/282                                                          |
| Goodness-of-fit on $F^2$                      | 1.049                                                               |
| Final R indexes [ $I \geq 2\sigma(I)$ ]       | $R_1 = 0.0330$ , $wR_2 = 0.0791$                                    |
| Final R indexes [all data]                    | $R_1 = 0.0386$ , $wR_2 = 0.0820$                                    |
| Largest diff. peak/hole / $e \text{\AA}^{-3}$ | 0.20/-0.15                                                          |

## 8. <sup>1</sup>H and <sup>13</sup>C Spectra of Key Compounds

<sup>1</sup>H NMR 500 MHz  
Solvent: CDCl<sub>3</sub>

Current Data Parameters  
NAME AMY-3-113-4OMe-keto-N2-  
EXPNO 1  
PROCNO 1  
F2 - Processing parameters  
SI 16384  
SF 499.7808466 MHz  
WDW EM  
SSB 0  
LB 0.30 Hz  
GB 0  
PC 1.00

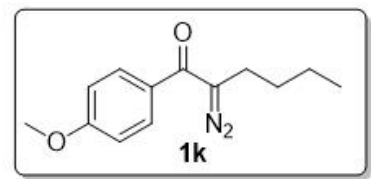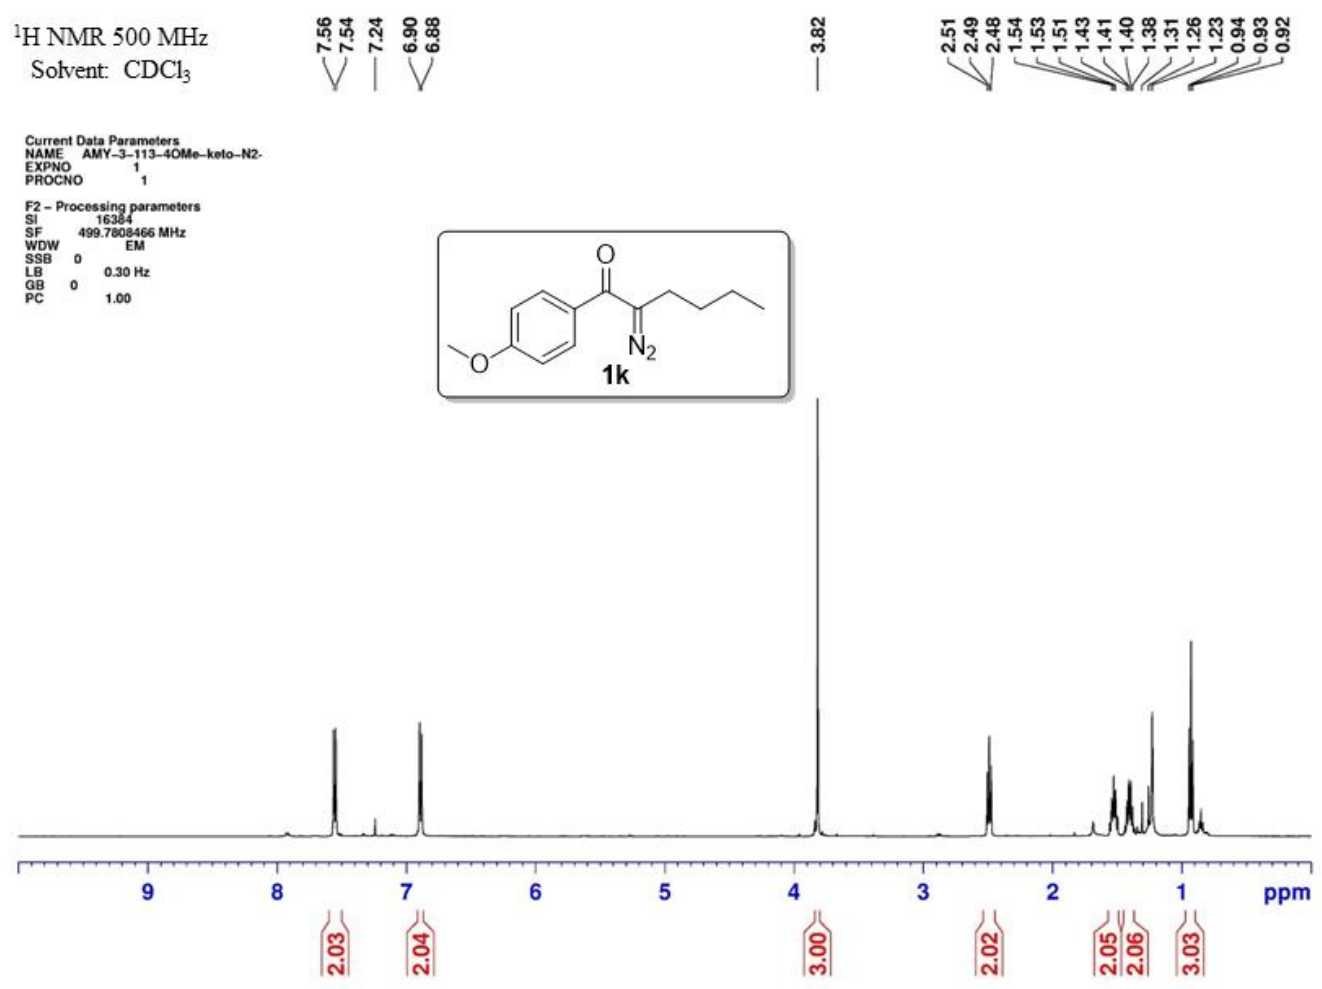



$^{13}\text{C}$  NMR; 125 MHz  
Solvent:  $\text{CDCl}_3$

Current Data Parameters  
NAME AMY-3-113-4OMe-keto-N2-Bu-13C.f  
EXPNO 1  
PROCNO 1  
F2 - Processing parameters  
SI 65536  
SF 125.6728843 MHz  
WDW EM  
SSB 0  
LB 0.30 Hz  
GB 0  
PC 1.00

188.67  
161.99  
130.46  
129.22  
113.64  
77.25  
77.00  
76.75  
55.35  
29.18  
23.35  
21.96  
13.76

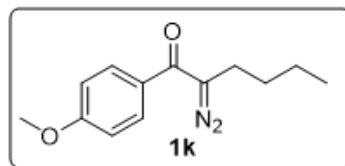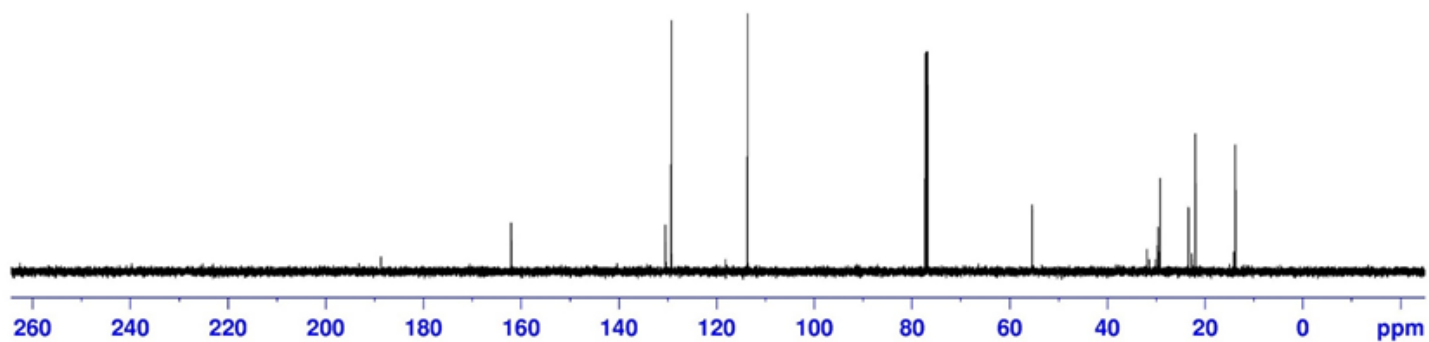

$^1\text{H}$  NMR; 400 MHz

Solvent:  $\text{CDCl}_3$

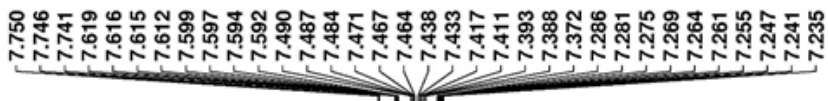

1.559

Current Data Parameters  
NAME AMY-03-103  
EXPNO 1  
PROCNO 1

F2 - Acquisition Parameters  
Date\_ 20211122  
Time 23.30  
INSTRUM spect  
PROBHD 5 mm DUL 13C-1  
PULPROG zg30  
TD 32768  
SOLVENT CDCl3  
NS 13  
DS 0  
SWH 6410.256 Hz  
FIDRES 0.195625 Hz  
AQ 2.5559540 sec  
RG 645  
DW 78.000 usec  
DE 6.00 usec  
TE 300.0 K  
D1 2.0000000 sec  
TD0 1

===== CHANNEL f1 =====  
NUC1 1H  
P1 10.00 usec  
PL1 -2.40 dB  
SFO1 400.1528010 MHz

F2 - Processing parameters  
SI 16384  
SF 400.1500168 MHz  
WDW EM  
SSB 0  
LB 0.00 Hz  
GB 0  
PC 1.00

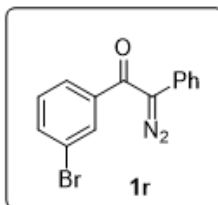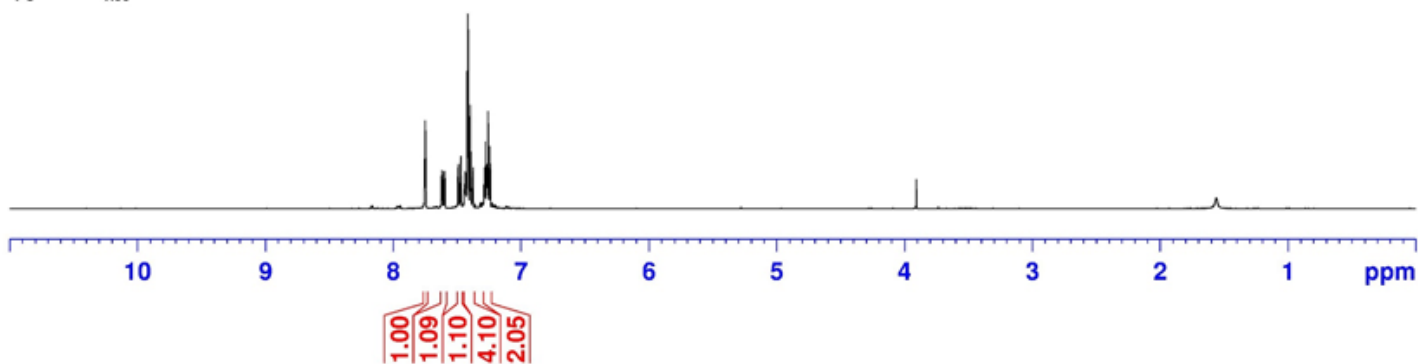

$^{13}\text{C}$  NMR; 100 MHz  
Solvent:  $\text{CDCl}_3$

186.514

139.647  
134.585  
130.871  
129.990  
129.139  
127.339  
126.260  
126.216  
125.645  
122.772

77.317  
77.000  
76.683  
73.384

Current Data Parameters  
NAME AMY-03-103  
EXPNO 2  
PROCNO 1

F2 - Acquisition Parameters  
Date\_ 20211122  
Time 23.33  
INSTRUM spect  
PROBHD 5 mm DUL 13C-1  
PULPROG zgpg30  
TD 65536  
SOLVENT CDCl3  
NS 845  
DS 0  
SWH 22727.273 Hz  
FIDRES 0.346791 Hz  
AQ 1.4417920 sec  
RG 2050  
DW 22.000 usec  
DE 6.00 usec  
TE 300.0 K  
D1 2.0000000 sec  
d11 0.0300000 sec  
DELTA 1.8999999 sec  
TD0 1

===== CHANNEL f1 =====  
NUC1 13C  
P1 9.70 usec  
PL1 -0.50 dB  
SFO1 100.6288660 MHz

===== CHANNEL f2 =====  
CPDPRG2 waltz16  
NUC2 1H  
PCPD2 90.00 usec  
PL2 -2.40 dB  
PL12 15.10 dB  
PL13 18.10 dB  
SFO2 400.1516010 MHz

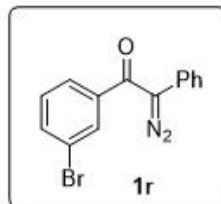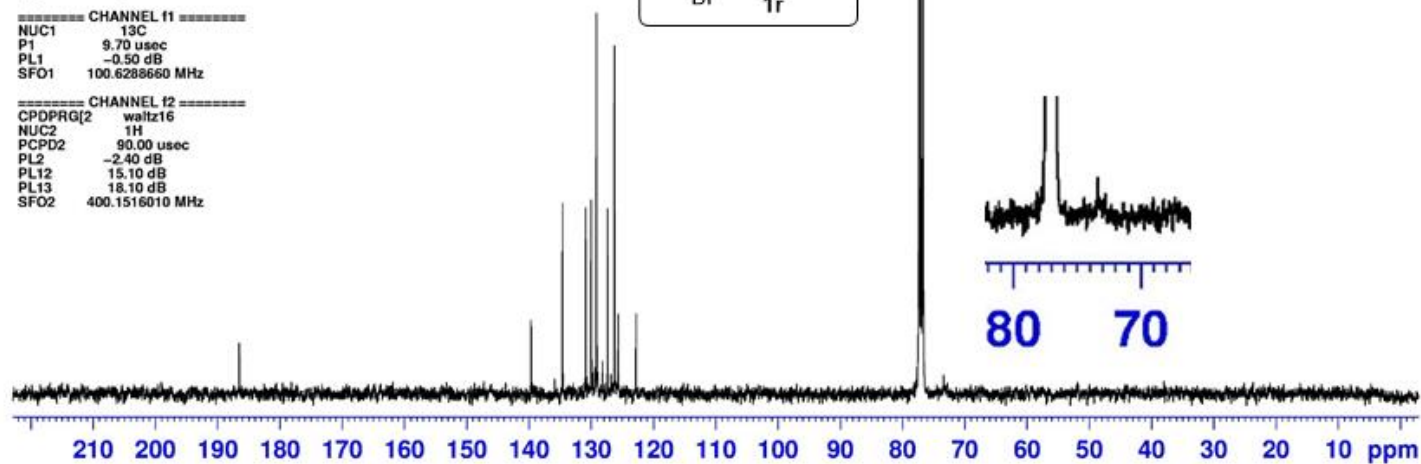

$^1\text{H}$  NMR: 400MHz  
Solvent:  $\text{CDCl}_3$

DB-02-25

Current Data Parameters  
NAME Diazo  
EXPNO 1  
PROCNO 1

F2 - Acquisition Parameters  
Date\_ 20221013  
Time 23.38  
INSTRUM spect  
PROBHD 5 mm DUL 13C-1  
PULPROG zg30  
TD 32768  
SOLVENT  $\text{CDCl}_3$   
NS 6  
DS 0  
SWH 6410.256 Hz  
FIDRES 0.195625 Hz  
AQ 2.5559039 sec  
RG 322  
DW 78.000 usec  
DE 6.00 usec  
TE 300.0 K  
D1 2.00000000 sec  
TD0 1

===== CHANNEL f1 =====  
NUC1  $^1\text{H}$   
P1 10.00 usec  
PL1 -2.40 dB  
SFO1 400.1528010 MHz

F2 - Processing parameters  
SI 16384  
SF 400.1500176 MHz  
WDW EM  
SSB 0  
LB 0 Hz  
GB 0  
PC 1.00

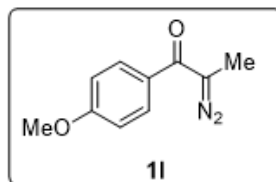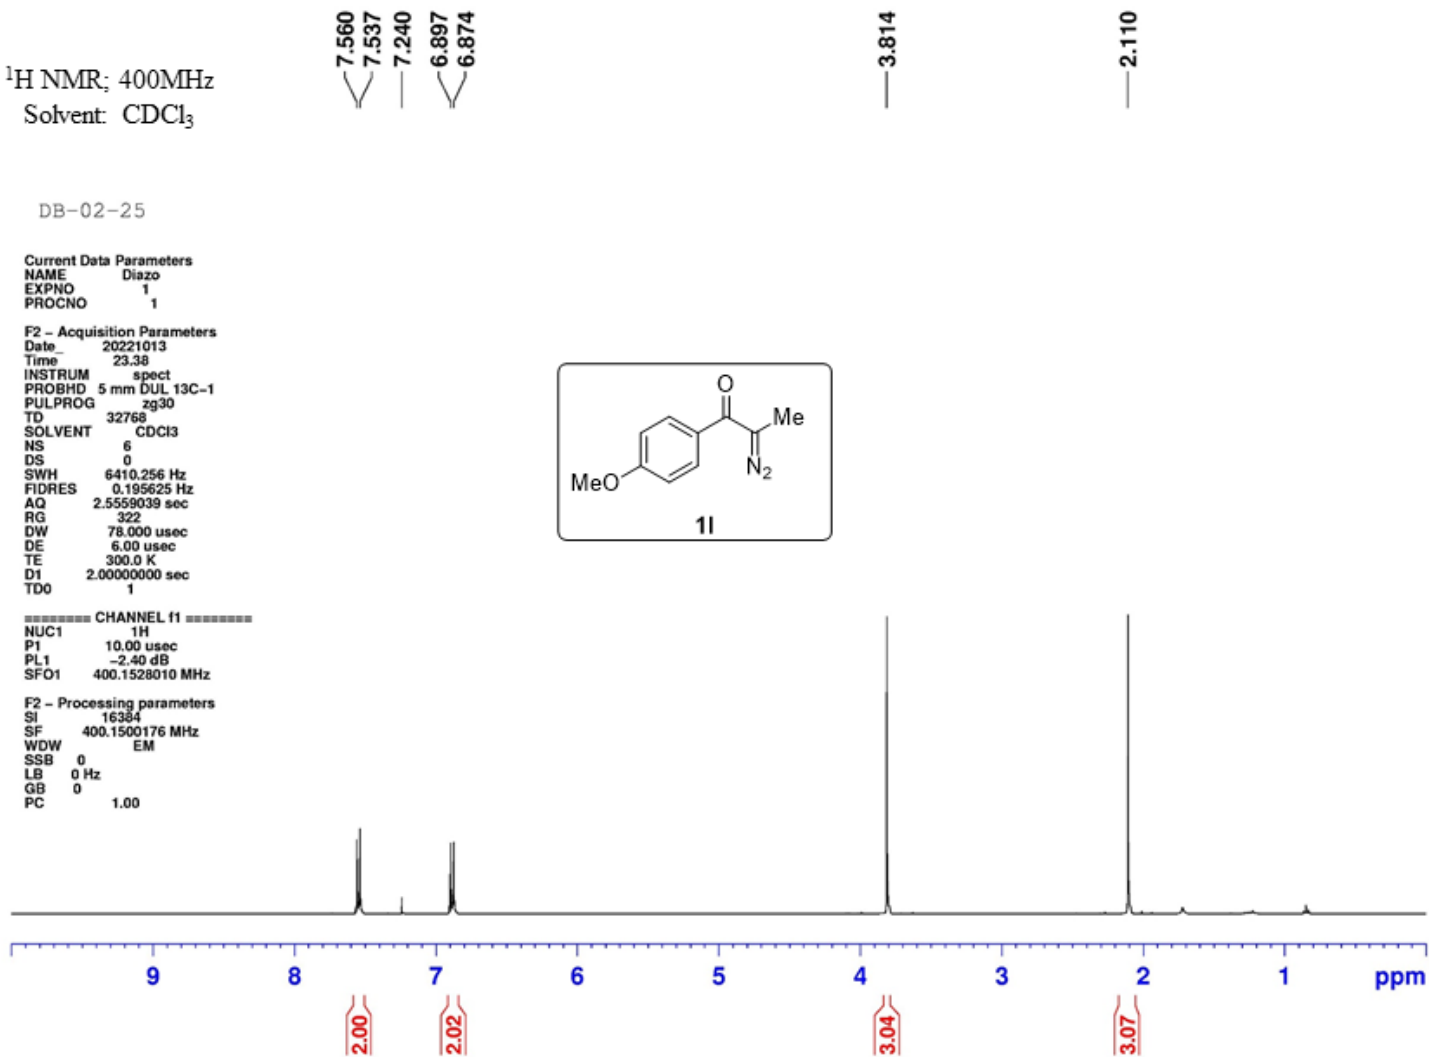

$^{13}\text{C}$  NMR; 100 MHz  
Solvent:  $\text{CDCl}_3$

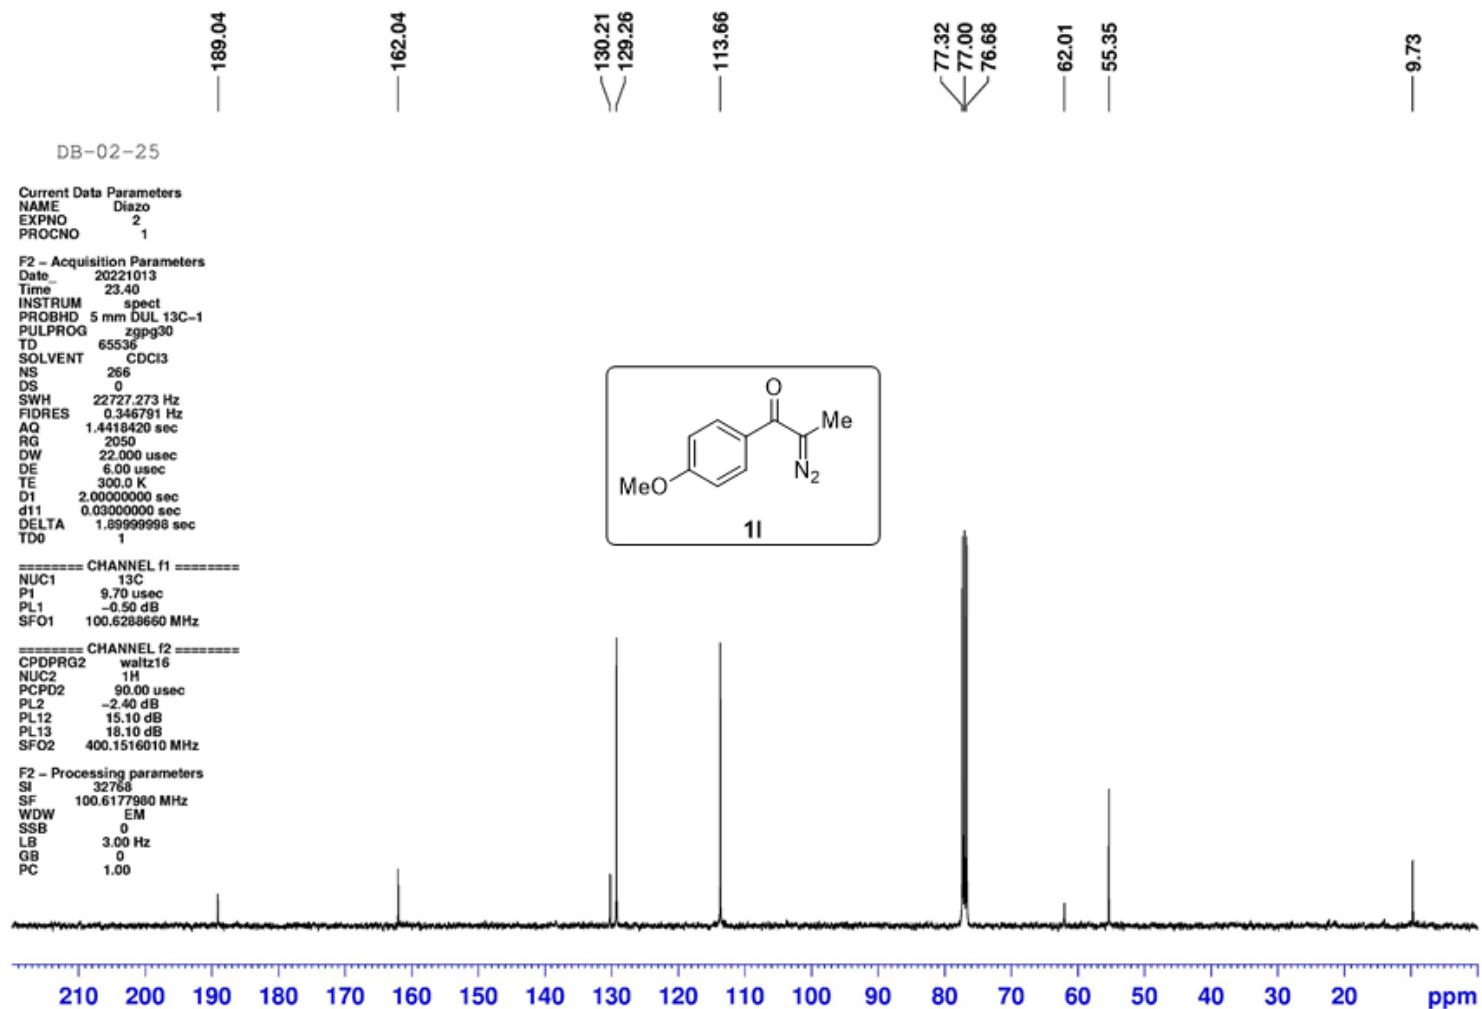

$^1\text{H}$  NMR; 700 MHz  
Solvent:  $\text{CDCl}_3$

7.462  
7.452  
7.373  
7.360  
7.335  
7.326  
7.315  
7.308  
7.298  
7.240  
6.855  
6.843

4.805  
4.318  
4.308  
4.298  
4.288  
3.771

1.604  
1.472  
1.462  
1.452

Current Data Parameters  
NAME AMY-3-35-B-H.fid  
EXPNO 1  
PROCNO 1

F2 - Processing parameters  
SI 65536  
SF 699.7431020 MHz  
WDW EM  
SSB 0  
LB 0.30 Hz  
GB 0  
PC 1.00

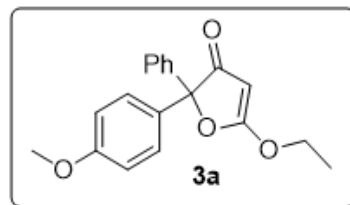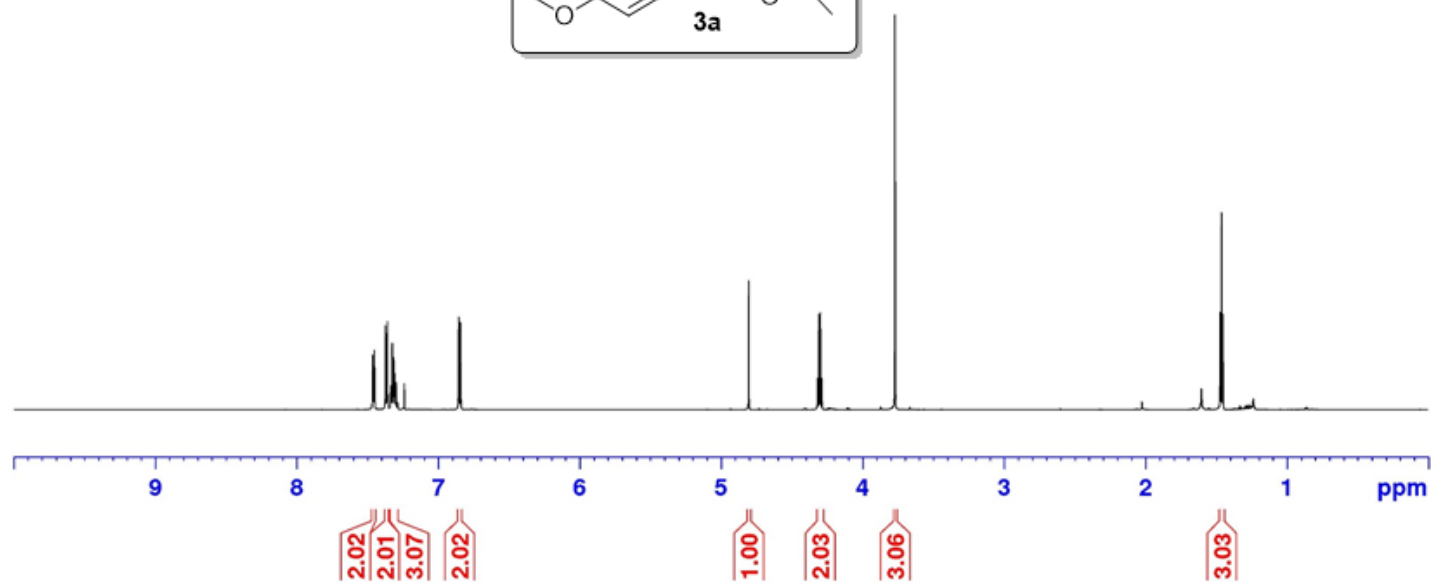

$^{13}\text{C}$  NMR; 175 MHz

Solvent:  $\text{CDCl}_3$

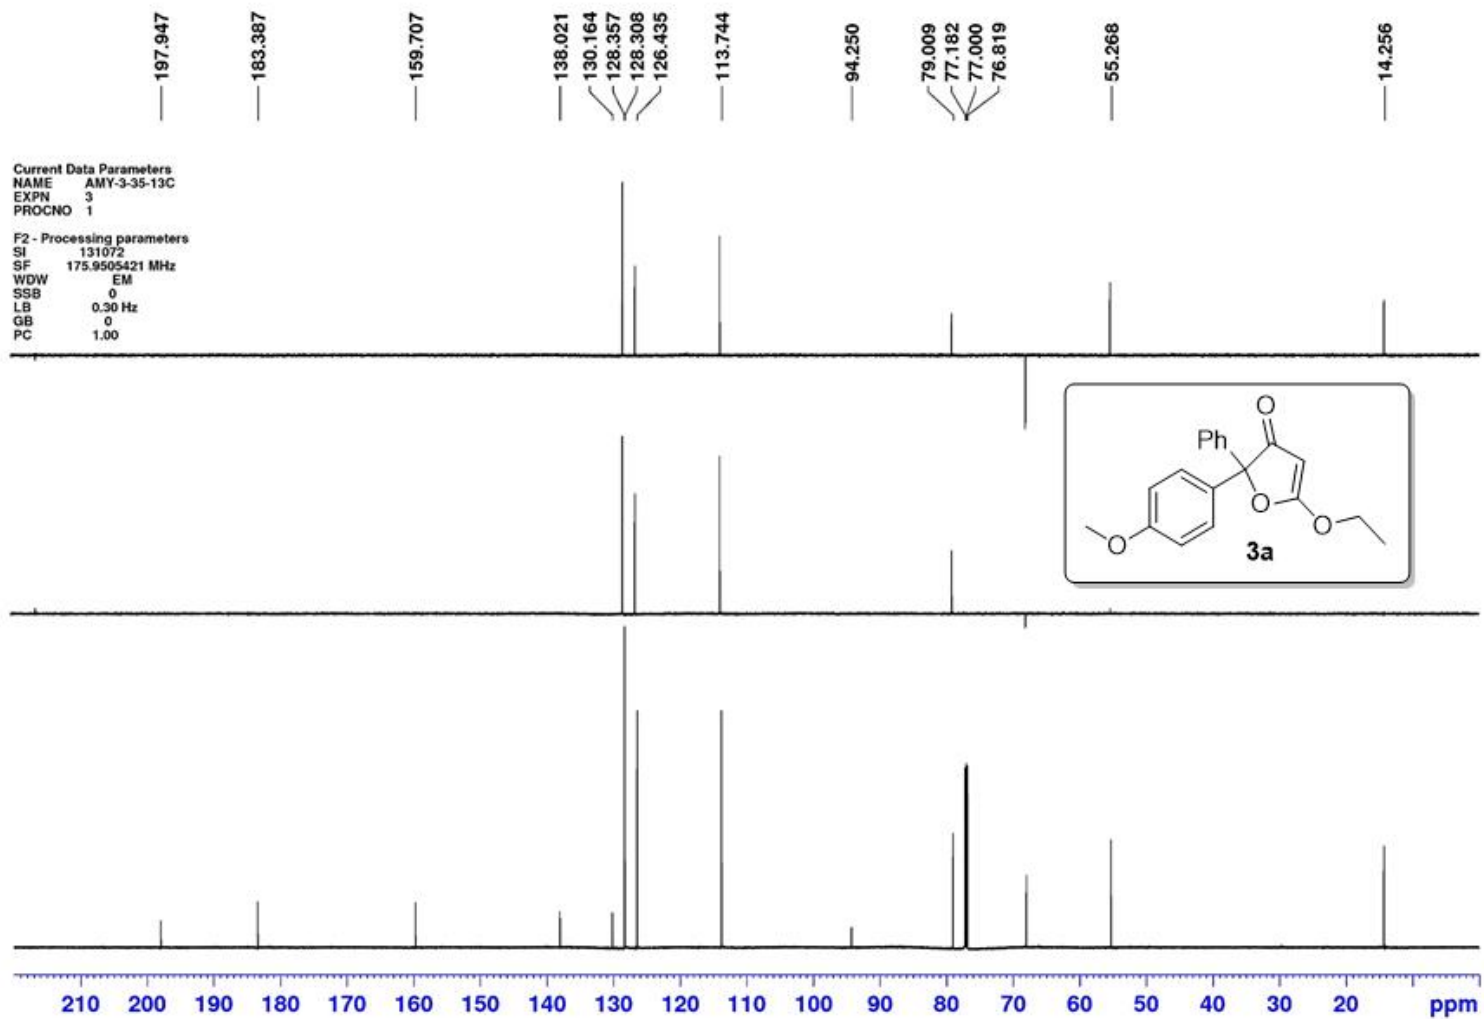

$^1\text{H}$  NMR: 500 MHz  
Solvent:  $\text{CDCl}_3$

7.916  
7.900  
7.393  
7.384  
7.330  
7.320  
7.240  
6.911  
6.894  
— 6.169

4.115  
4.101  
4.087  
4.073  
3.838

1.594  
1.402  
1.235  
1.130  
1.116  
1.102

Current Data Parameters  
NAME AMY-3-30-B-1H.fid  
EXPNO 1  
PROCNO 1  
F2 - Processing parameters  
SI 16384  
SF 499.7908460 MHz  
WDW EM  
SSB 0  
LB 0.30 Hz  
GB 0  
PC 1.00

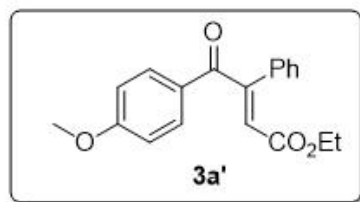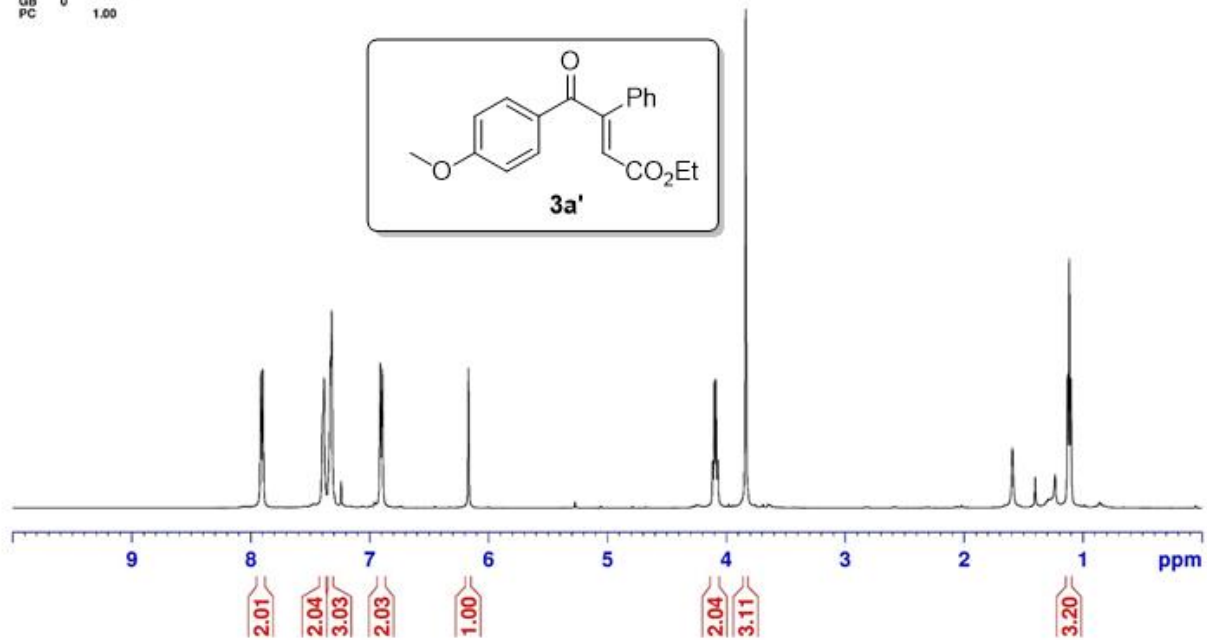



$^{13}\text{C}$  NMR: 125 MHz  
Solvent:  $\text{CDCl}_3$

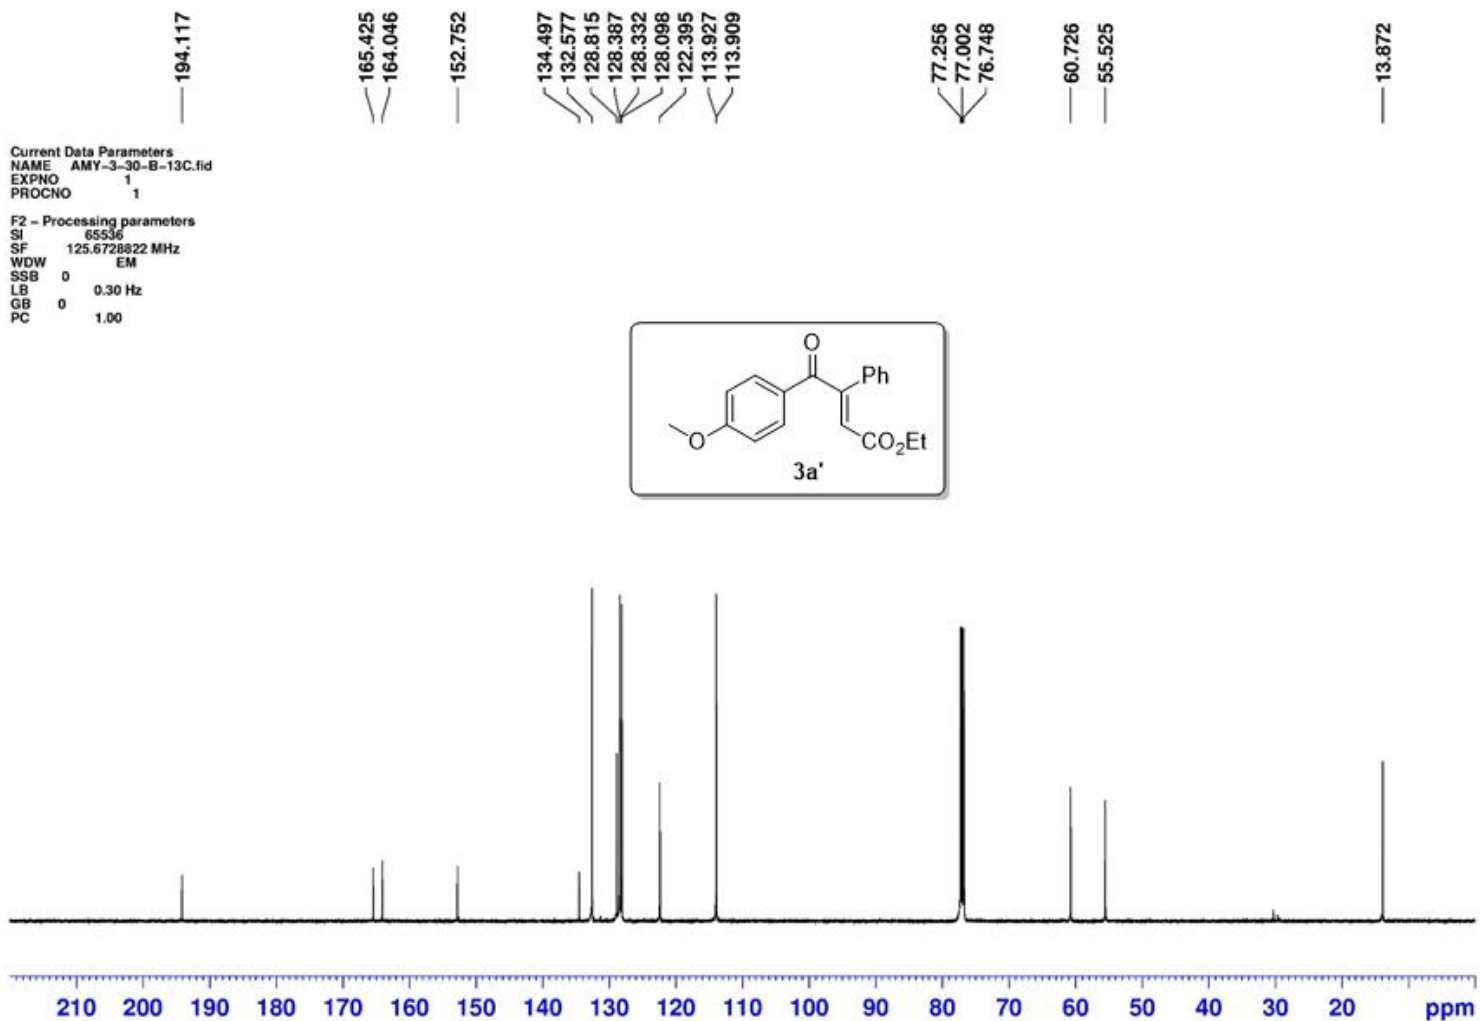

NOE 3a'

Solvent: CDCl<sub>3</sub>

AMY-3-30-B

Sample Name:  
AMY-3-30-B  
Data Collected on:  
Varian-NMR-vnmrs700  
Archive directory:

Sample directory:

FidFile: PROTON

Pulse Sequence: PROTON (s2pul)  
Solvent: cdcl3  
Data collected on: Aug 22 2022

Temp. 25.0 C / 298.1 K  
Operator: peng

Relax. delay 3.000 sec  
Pulse 45.0 degrees  
Acq. time 2.936 sec  
Width 11160.7 Hz  
16 repetitions  
OBSERVE H1, 699.7431022 MHz  
DATA PROCESSING  
FT size 65536  
Total time 1 min 35 sec

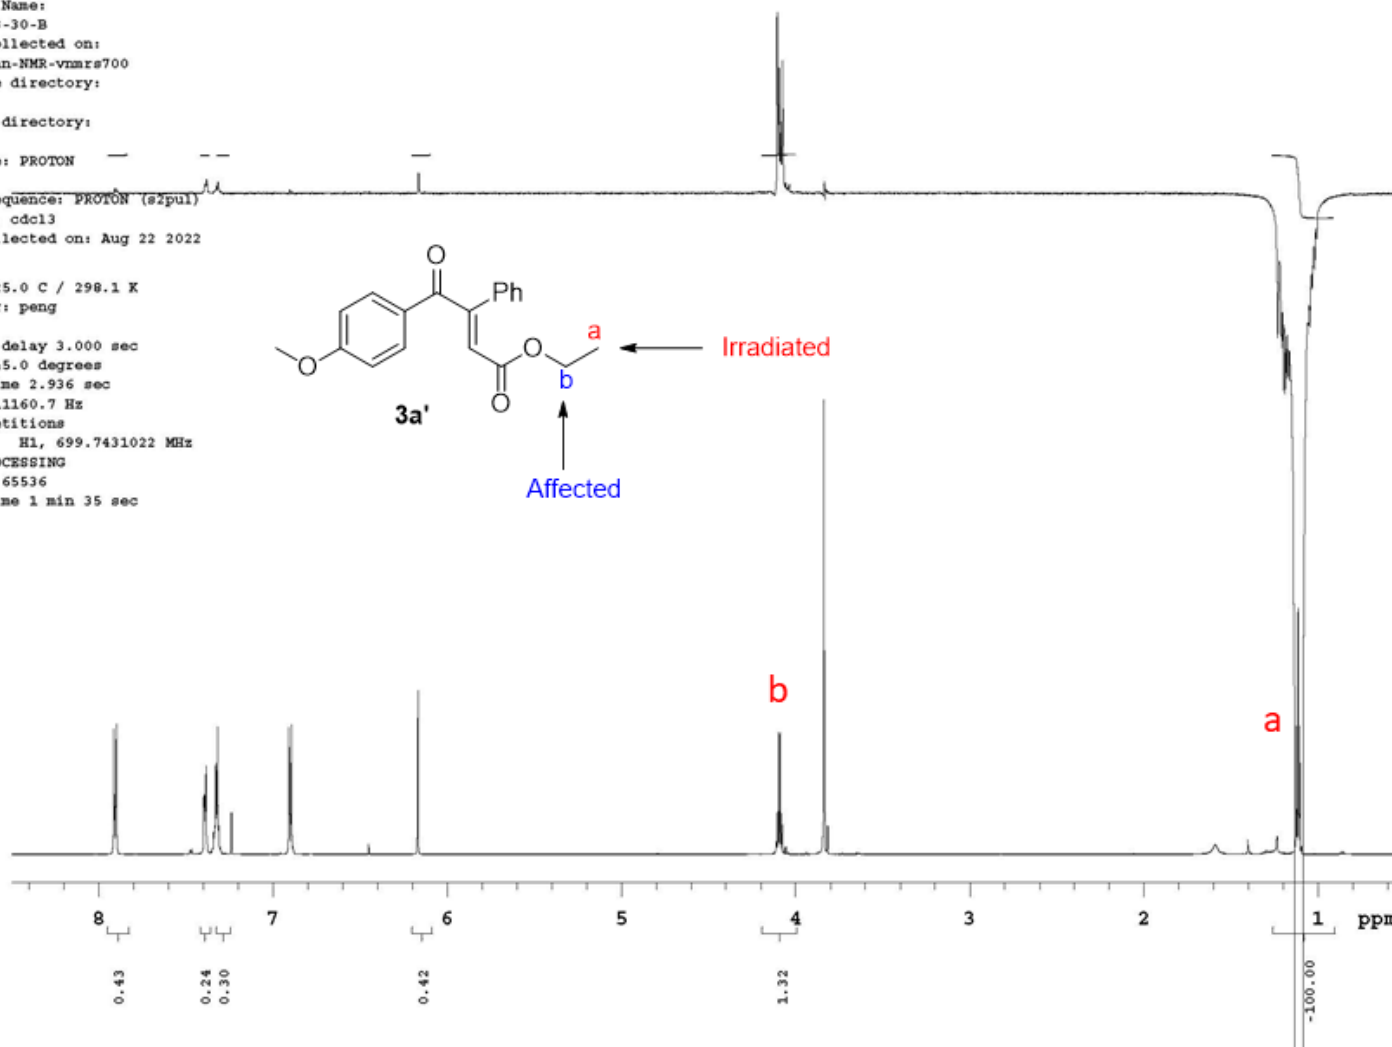

# NOE 3a'

Solvent: CDCl<sub>3</sub>

AMY-3-30-B

Sample Name:  
AMY-3-30-B  
Data Collected on:  
Varian-NMR-vnmrs700  
Archive directory:

Sample directory:

FidFile: PROTON

Pulse Sequence: PROTON (s2pul)  
Solvent: cdcl3  
Data collected on: Aug 22 2022

Temp. 25.0 C / 298.1 K  
Operator: peng

Relax. delay 3.000 sec  
Pulse 45.0 degrees  
Acq. time 2.936 sec  
Width 11160.7 Hz  
16 repetitions  
OBSERVE H1, 699.7431022 MHz  
DATA PROCESSING  
FT size 65536  
Total time 1 min 35 sec

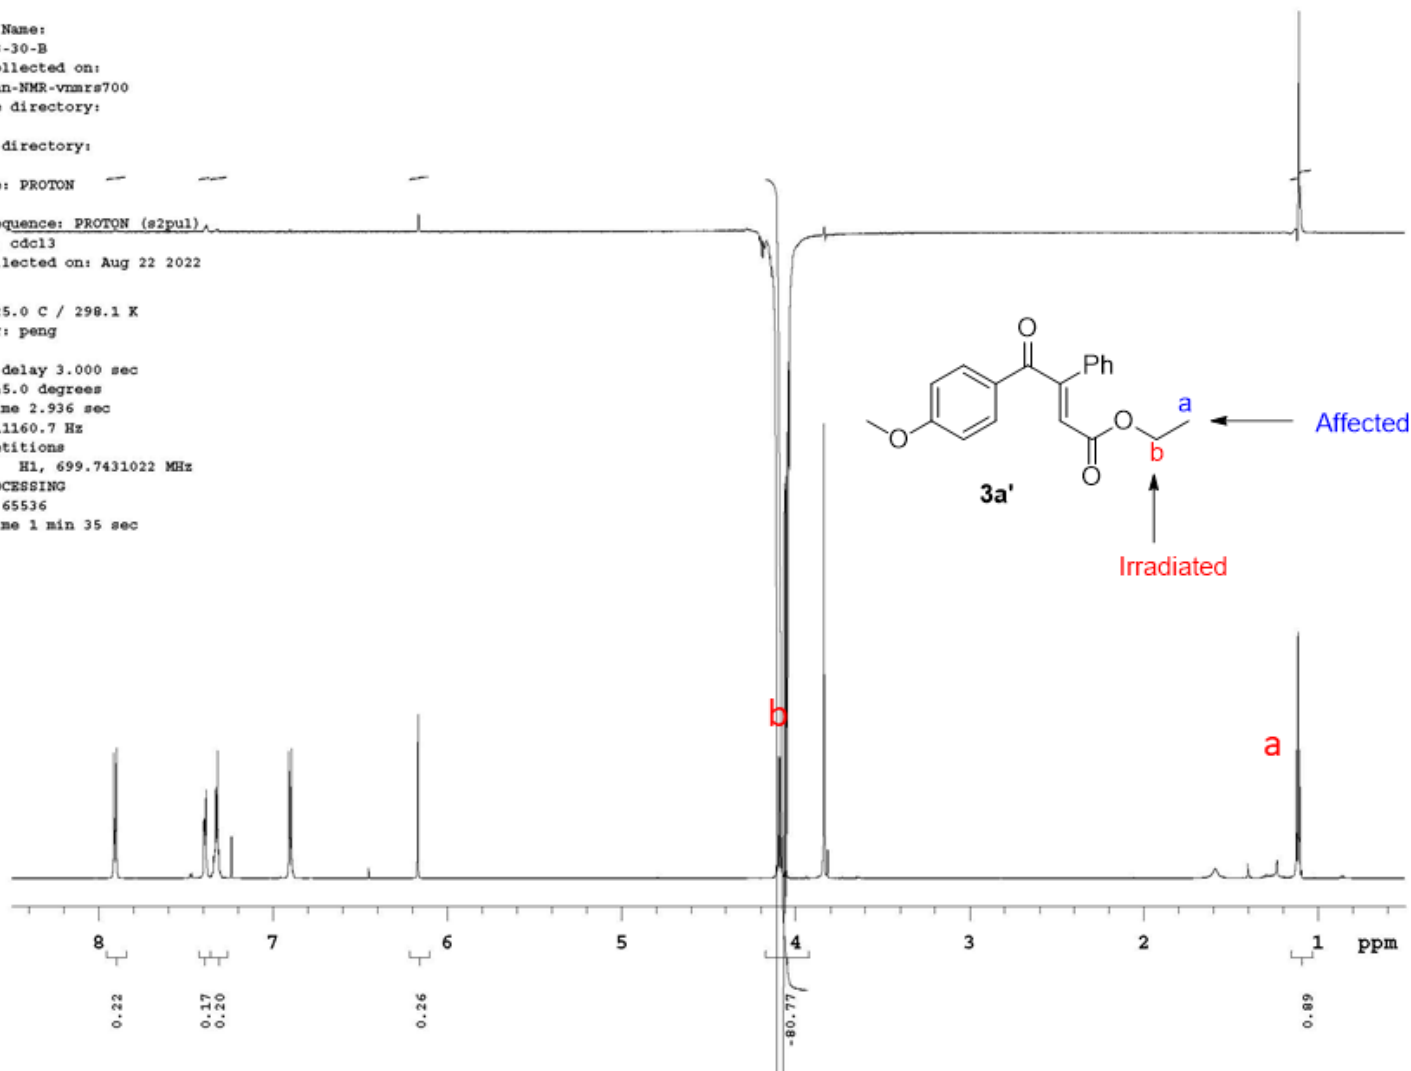

NOE 3a'

Solvent: CDCl<sub>3</sub>

AMY-3-30-B

Sample Name:  
AMY-3-30-B  
Data Collected on:  
Varian-NMR-vnmrs700  
Archive directory:

Sample directory:

FidFile: PROTON

Pulse Sequence: PROTON (s2pul)  
Solvent: cdcl3  
Data collected on: Aug 22 2022

Temp. 25.0 C / 298.1 K  
Operator: peng

Relax. delay 3.000 sec  
Pulse 45.0 degrees  
Acq. time 2.936 sec  
Width 11160.7 Hz  
16 repetitions  
OBSERVE H1, 699.7431022 MHz  
DATA PROCESSING  
FT size 65536  
Total time 1 min 35 sec

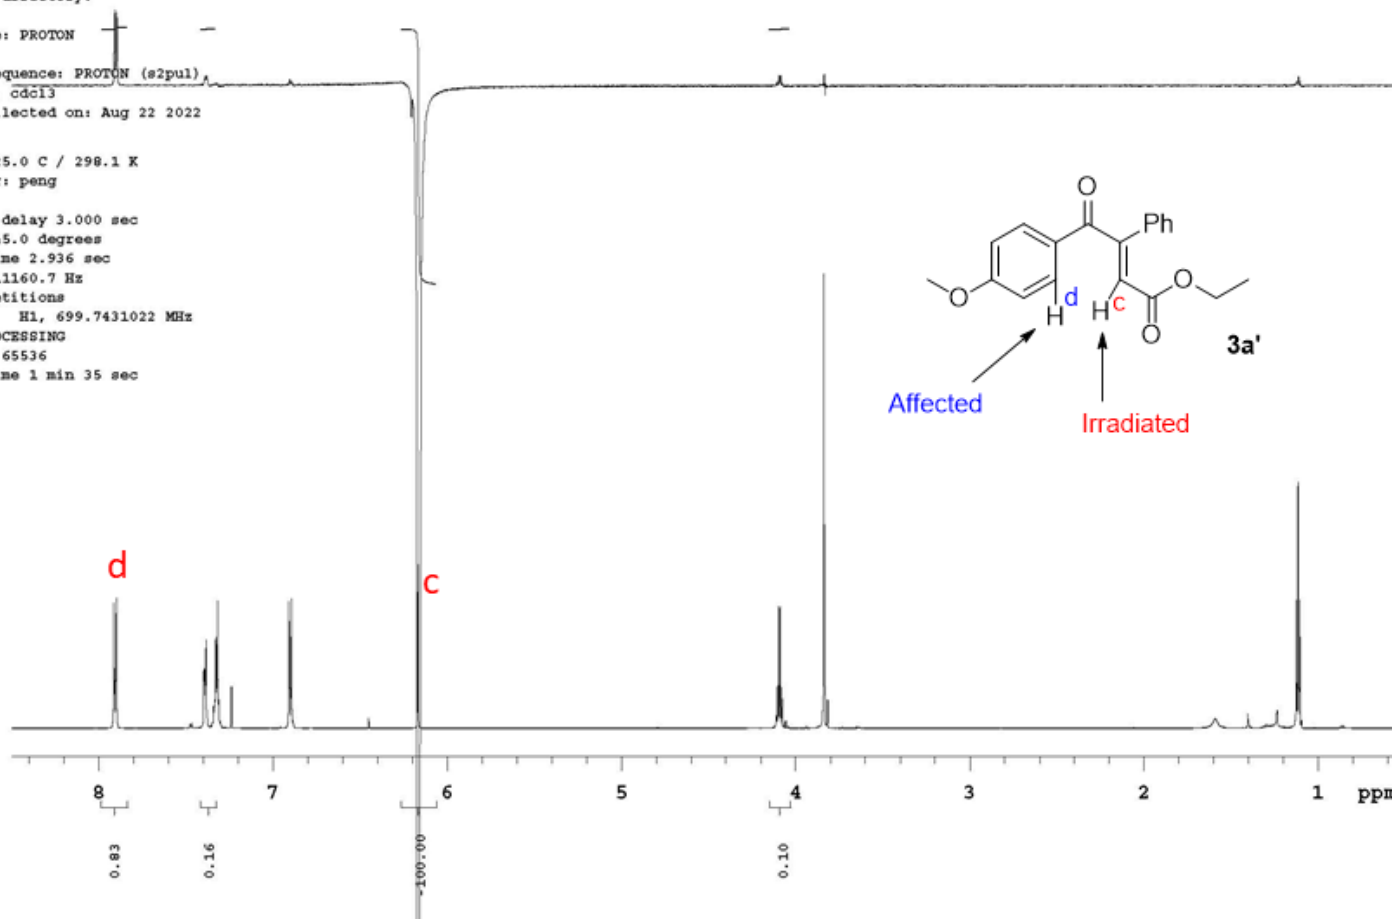

NOE 3a'

Solvent: CDCl<sub>3</sub>

AMY-3-30-B

Sample Name:  
AMY-3-30-B  
Data Collected on:  
Varian-NMR-vnmrs700  
Archive directory:

Sample directory:

FidFile: PROTON

Pulse Sequence: PROTON (s2pul)  
Solvent: cdcl3  
Data collected on: Aug 22 2022

Temp. 25.0 C / 298.1 K  
Operator: peng

Relax. delay 3.000 sec  
Pulse 45.0 degrees  
Acq. time 2.936 sec  
Width 11160.7 Hz  
16 repetitions  
OBSERVE H1, 699.7431022 MHz  
DATA PROCESSING  
FT size 65536  
Total time 1 min 35 sec

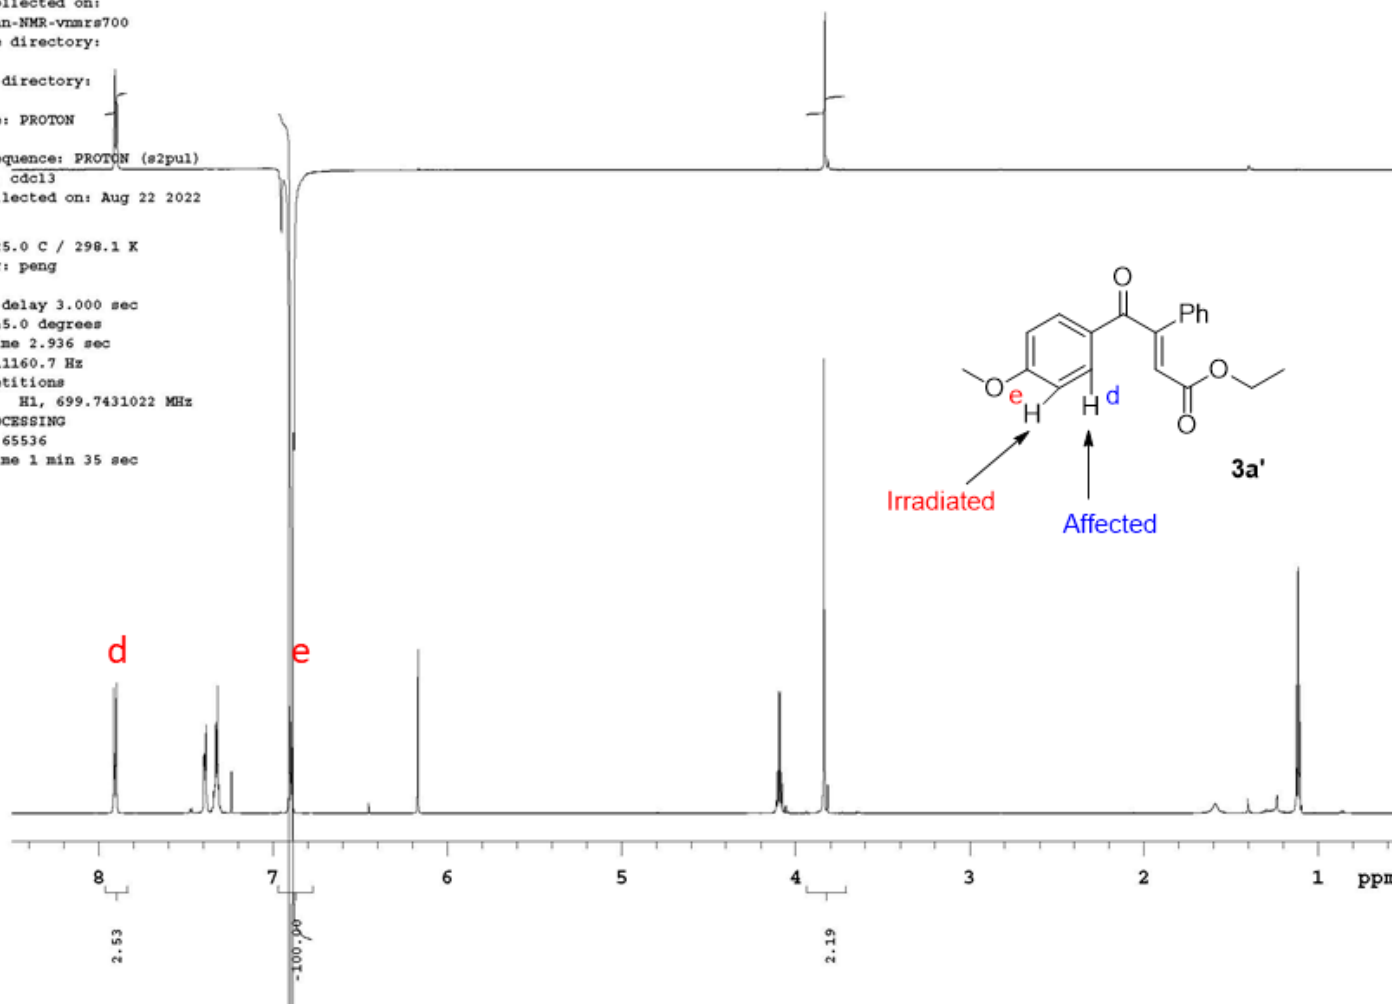

NOE 3a'

Solvent: CDCl<sub>3</sub>

AMY-3-30-B

Sample Name:  
AMY-3-30-B  
Data Collected on:  
Varian-NMR-vnmrs700  
Archive directory:

Sample directory:

FidFile: PROTON

Pulse Sequence: PROTON (s2pul)  
Solvent: cdcl3  
Data collected on: Aug 22 2022

Temp. 25.0 C / 298.1 K  
Operator: peng

Relax. delay 3.000 sec  
Pulse 45.0 degrees  
Acq. time 2.936 sec  
Width 11160.7 Hz  
16 repetitions  
OBSERVE H1, 699.7431022 MHz  
DATA PROCESSING  
FT size 65536  
Total time 1 min 35 sec

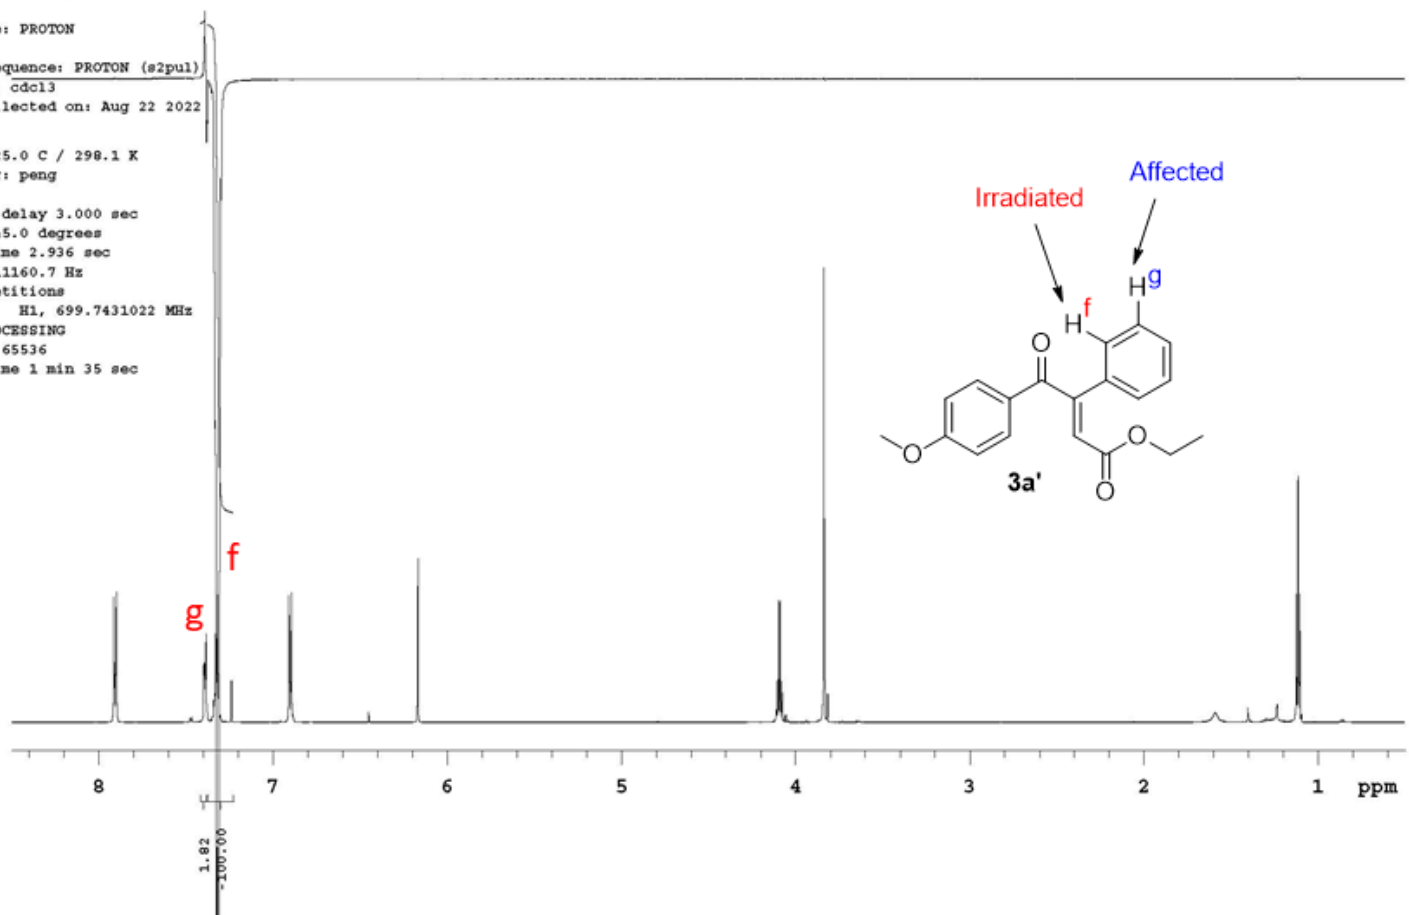

NOE 3a'  
Solvent: CDCl<sub>3</sub>

AMY-3-30-B

Sample Name:  
AMY-3-30-B  
Data Collected on:  
Varian-NMR-vnmrs700  
Archive directory:

Sample directory:

FidFile: PROTON

Pulse Sequence: PROTON (s2pul)  
Solvent: cdcl3  
Data collected on: Aug 22 2022

Temp. 25.0 C / 298.1 K  
Operator: peng

Relax. delay 3.000 sec  
Pulse 45.0 degrees  
Acq. time 2.936 sec  
Width 11160.7 Hz  
16 repetitions  
OBSERVE H1, 699.7431022 MHz  
DATA PROCESSING  
FT size 65536  
Total time 1 min 35 sec

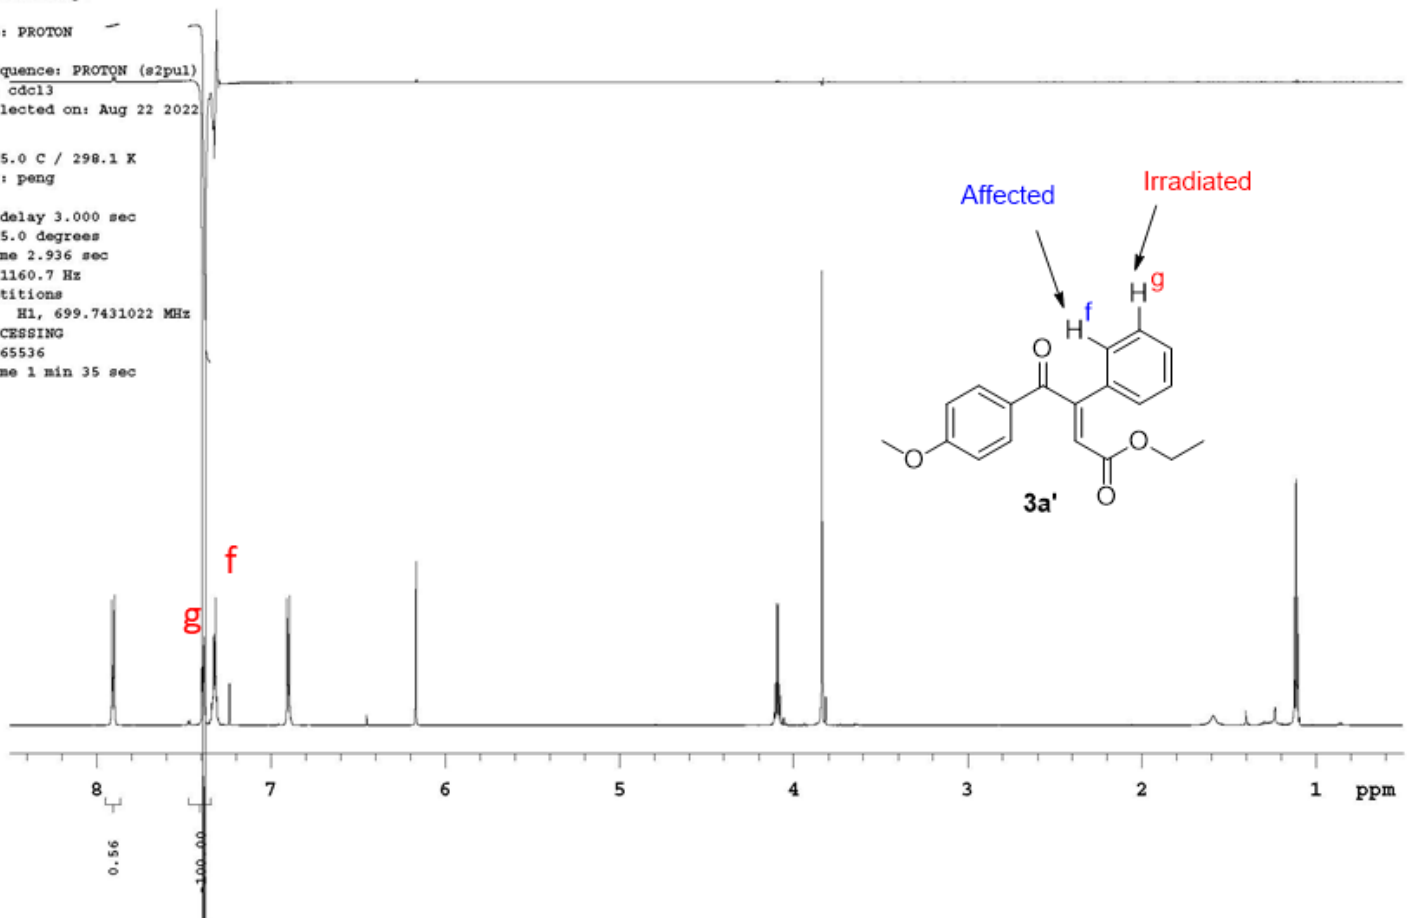

$^1\text{H}$  NMR; 700 MHz  
Solvent:  $\text{CDCl}_3$

7.412  
7.400  
7.336  
7.324  
7.300  
7.288  
7.240  
6.853  
6.841

4.800  
4.318  
4.308  
4.298  
4.288  
3.772

1.556  
1.476  
1.466  
1.456  
1.234

Current Data Parameters  
NAME AMY-3-39-H.fid  
EXPNO 1  
PROCNO 1  
F2 - Processing parameters  
SI 65536  
SF 699.7431005 MHz  
WDW EM  
SSB 0  
LB 0.30 Hz  
GB 0  
PC 1.00

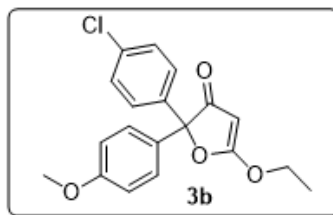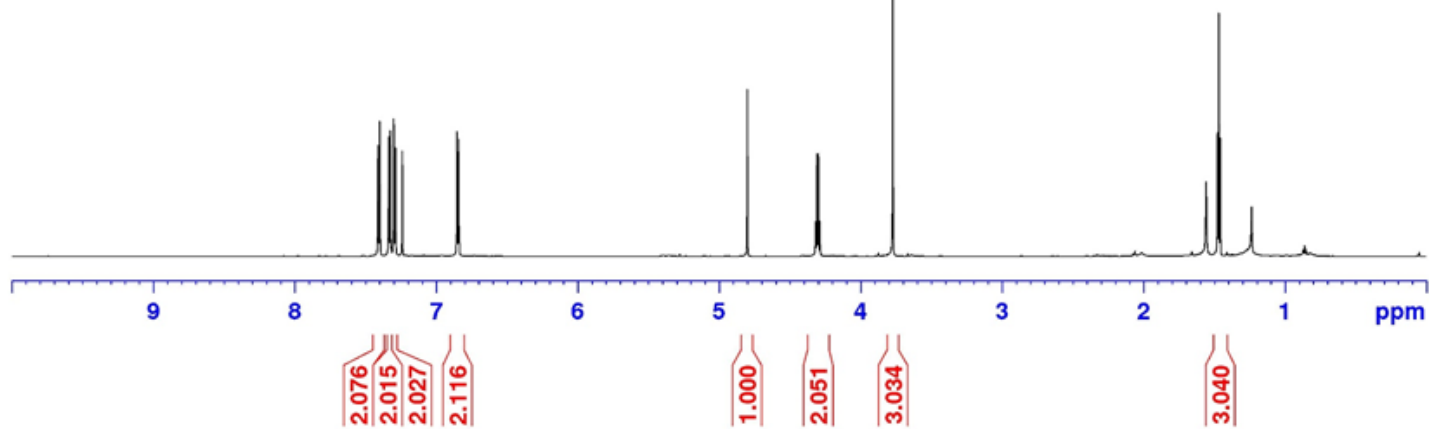



$^{13}\text{C}$  NMR: 175 MHz  
Solvent:  $\text{CDCl}_3$

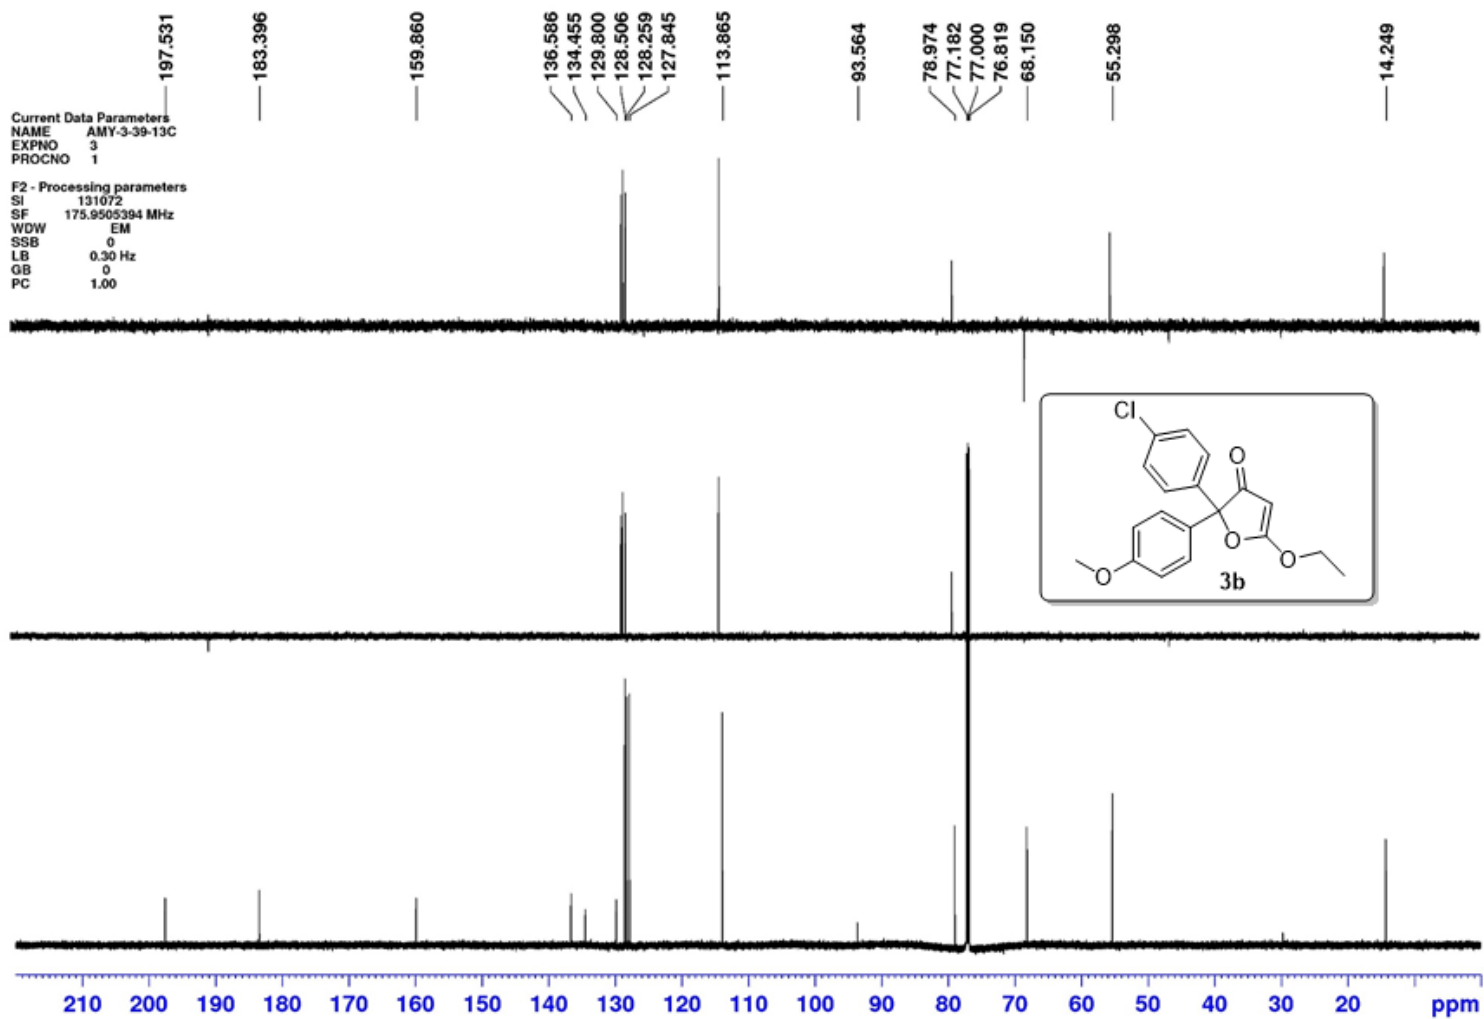

$^1\text{H}$  NMR: 700 MHz  
Solvent:  $\text{CDCl}_3$

8.179  
8.166  
7.697  
7.684  
7.342  
7.329  
7.240  
6.866  
6.853

4.827  
4.341  
4.331  
4.323  
4.313  
3.775

1.594  
1.496  
1.486  
1.476

Current Data Parameters  
NAME AMY-3-41-H.fid  
EXPNO 3  
PROCNO 1  
F2 - Processing parameters  
SI 65536  
SF 699.7430996 MHz  
WDW EM  
SSB 0  
LB 0.30 Hz  
GB 0  
PC 1.00

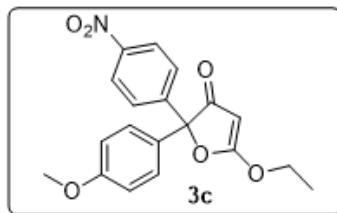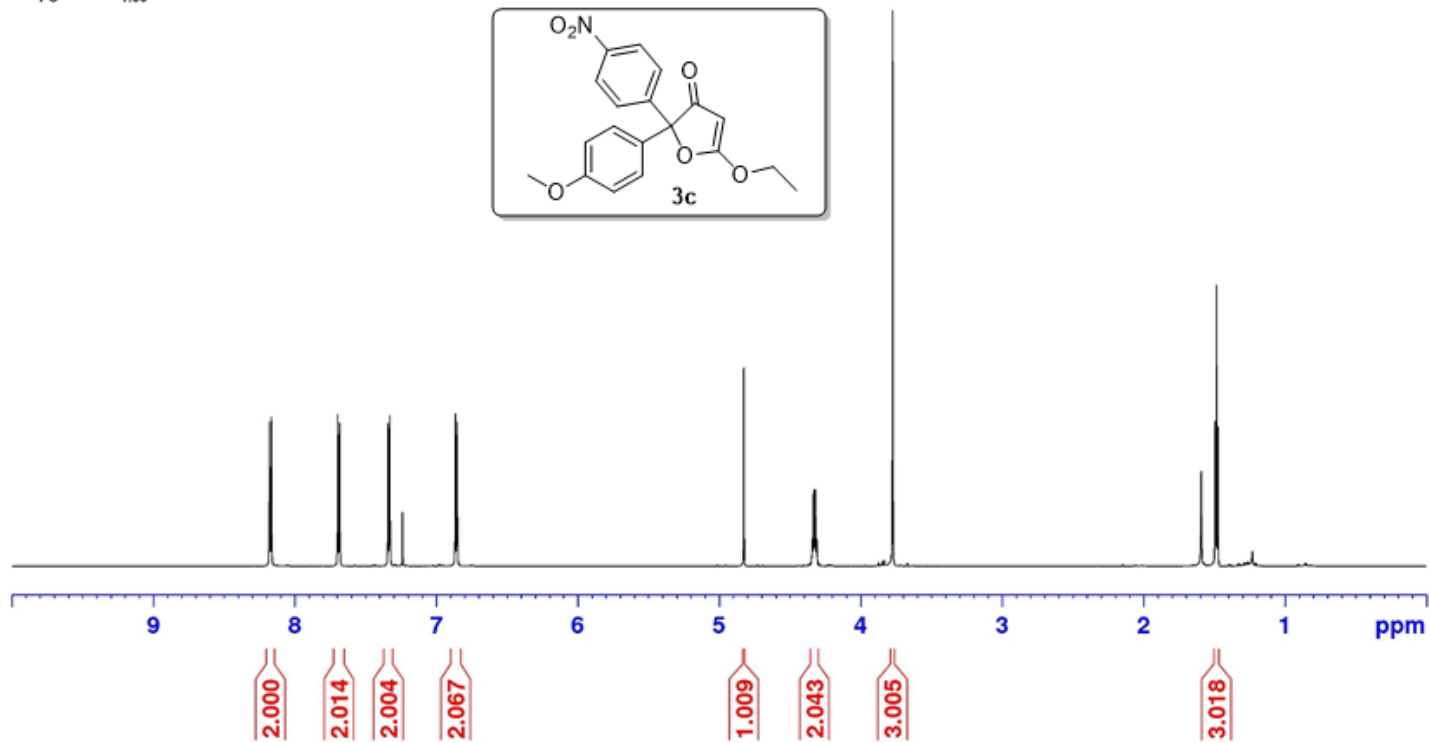

$^{13}\text{C}$  NMR: 175 MHz

Solvent:  $\text{CDCl}_3$

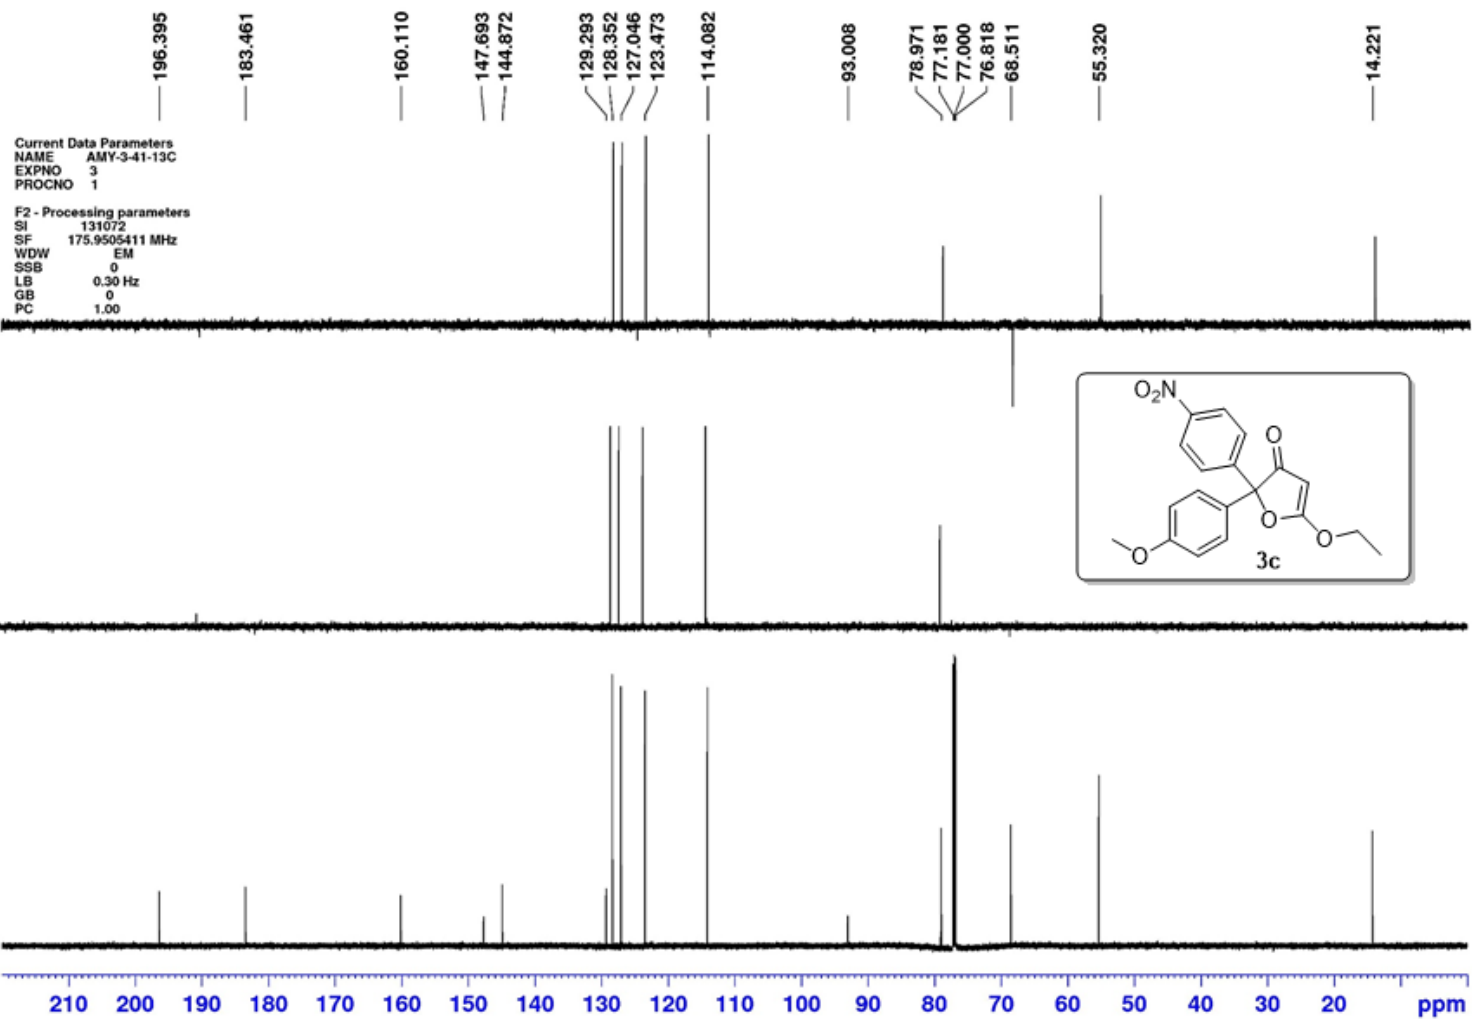

$^1\text{H}$  NMR; 700 MHz  
Solvent:  $\text{CDCl}_3$

Current Data Parameters  
NAME AMY-3-40-H.fid  
EXPNO 1  
PROCNO 1  
F2 - Processing parameters  
SI 65536  
SF 699.7431022 MHz  
WDW EM  
SSB 0  
LB 0.30 Hz  
GB 0  
PC 1.00

7.455  
7.443  
7.354  
7.341  
7.334  
7.322  
7.240  
6.851  
6.838

4.798  
4.312  
4.301  
4.291  
4.281  
3.766

1.673  
1.469  
1.459  
1.449

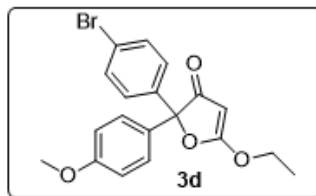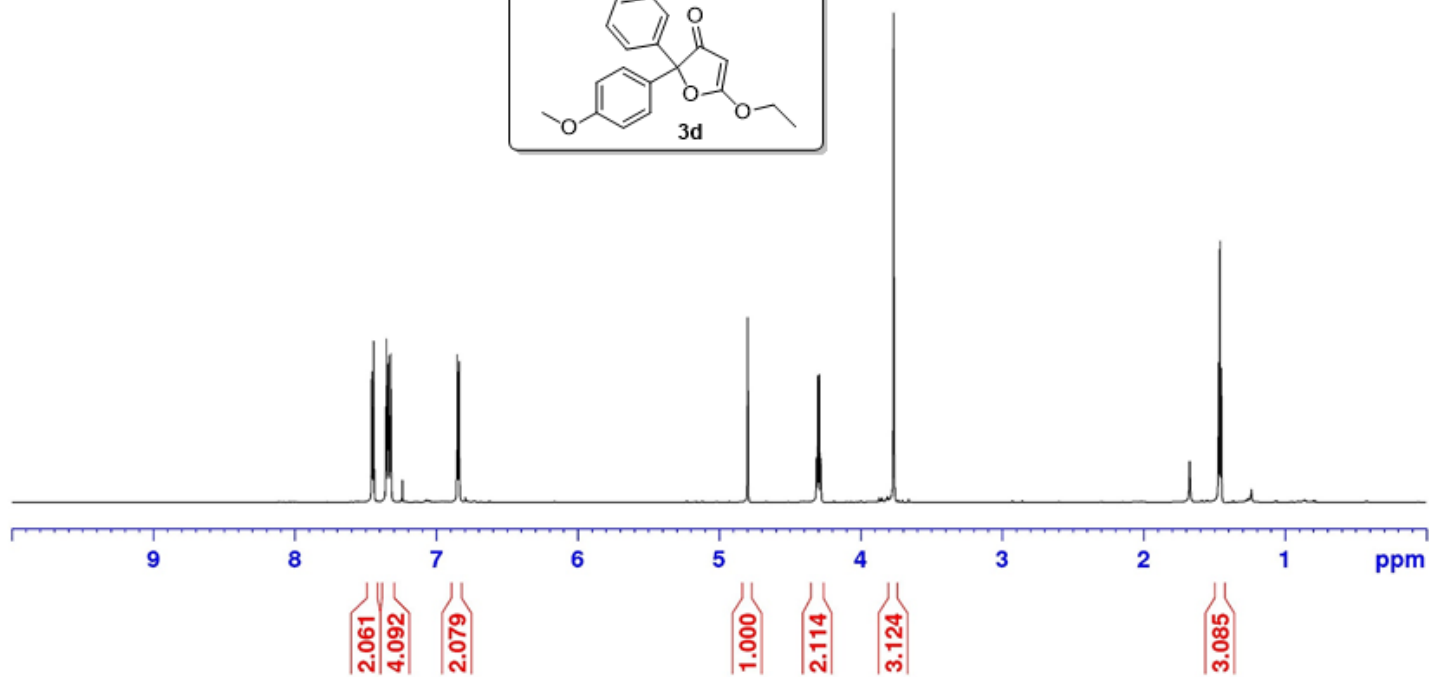

$^{13}\text{C}$  NMR; 175 MHz  
Solvent:  $\text{CDCl}_3$

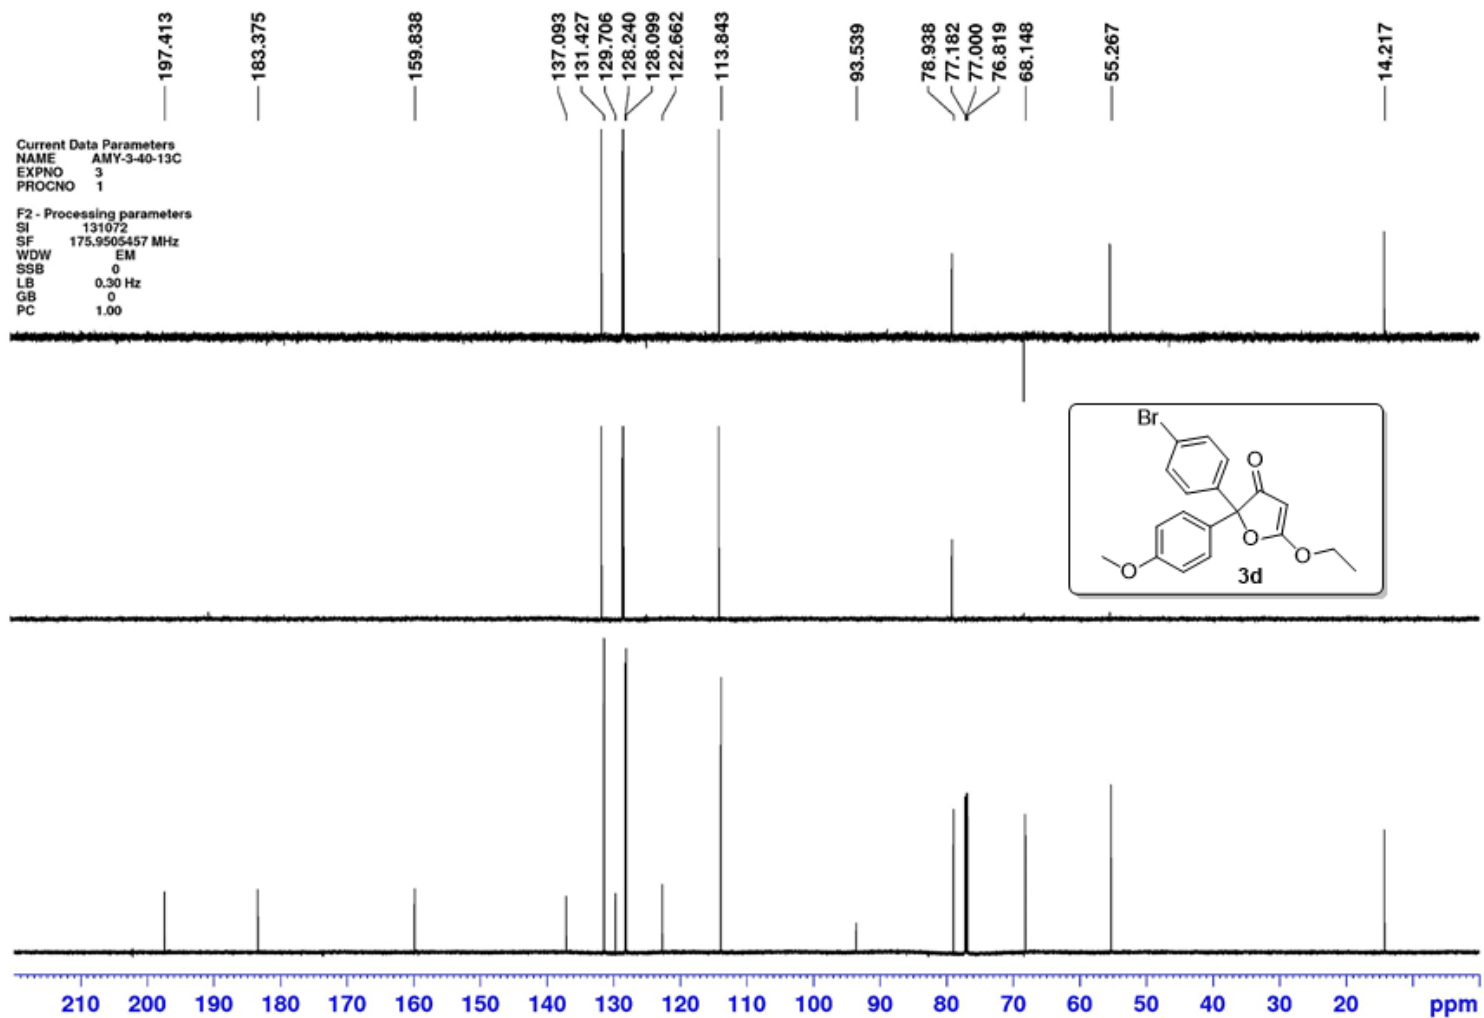

$^1\text{H}$  NMR; 700 MHz  
Solvent:  $\text{CDCl}_3$

Current Data Parameters  
NAME AMY-3-70-H.fid  
EXPNO 3  
PROCNO 1  
F2 - Processing parameters  
SI 65536  
SF 699.7431005 MHz  
WDW EM  
SSB 0  
LB 0.30 Hz  
GB 0  
PC 1.00

7.368  
7.355  
7.337  
7.325  
7.240  
7.138  
7.126  
6.850  
6.838

4.795  
4.308  
4.298  
4.288  
4.278  
3.768

2.314

1.649  
1.464  
1.453  
1.443

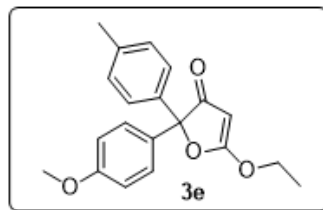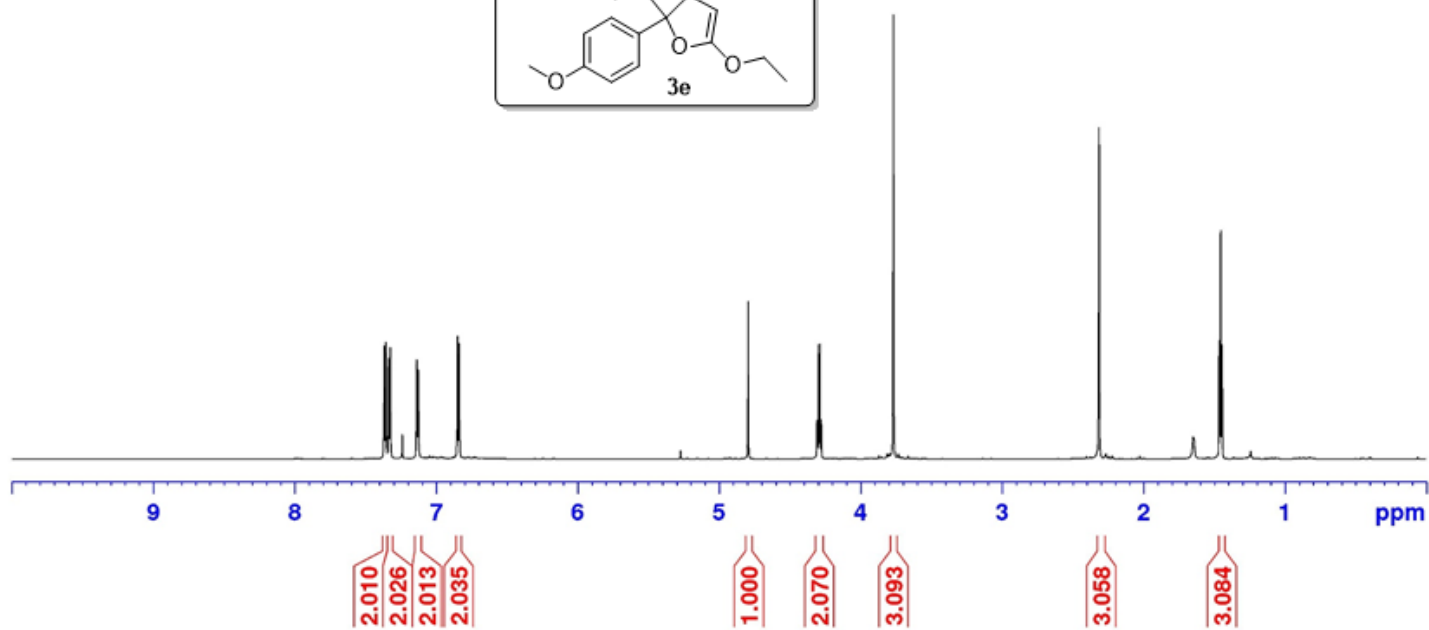

$^{13}\text{C}$  NMR; 175 MHz

Solvent:  $\text{CDCl}_3$

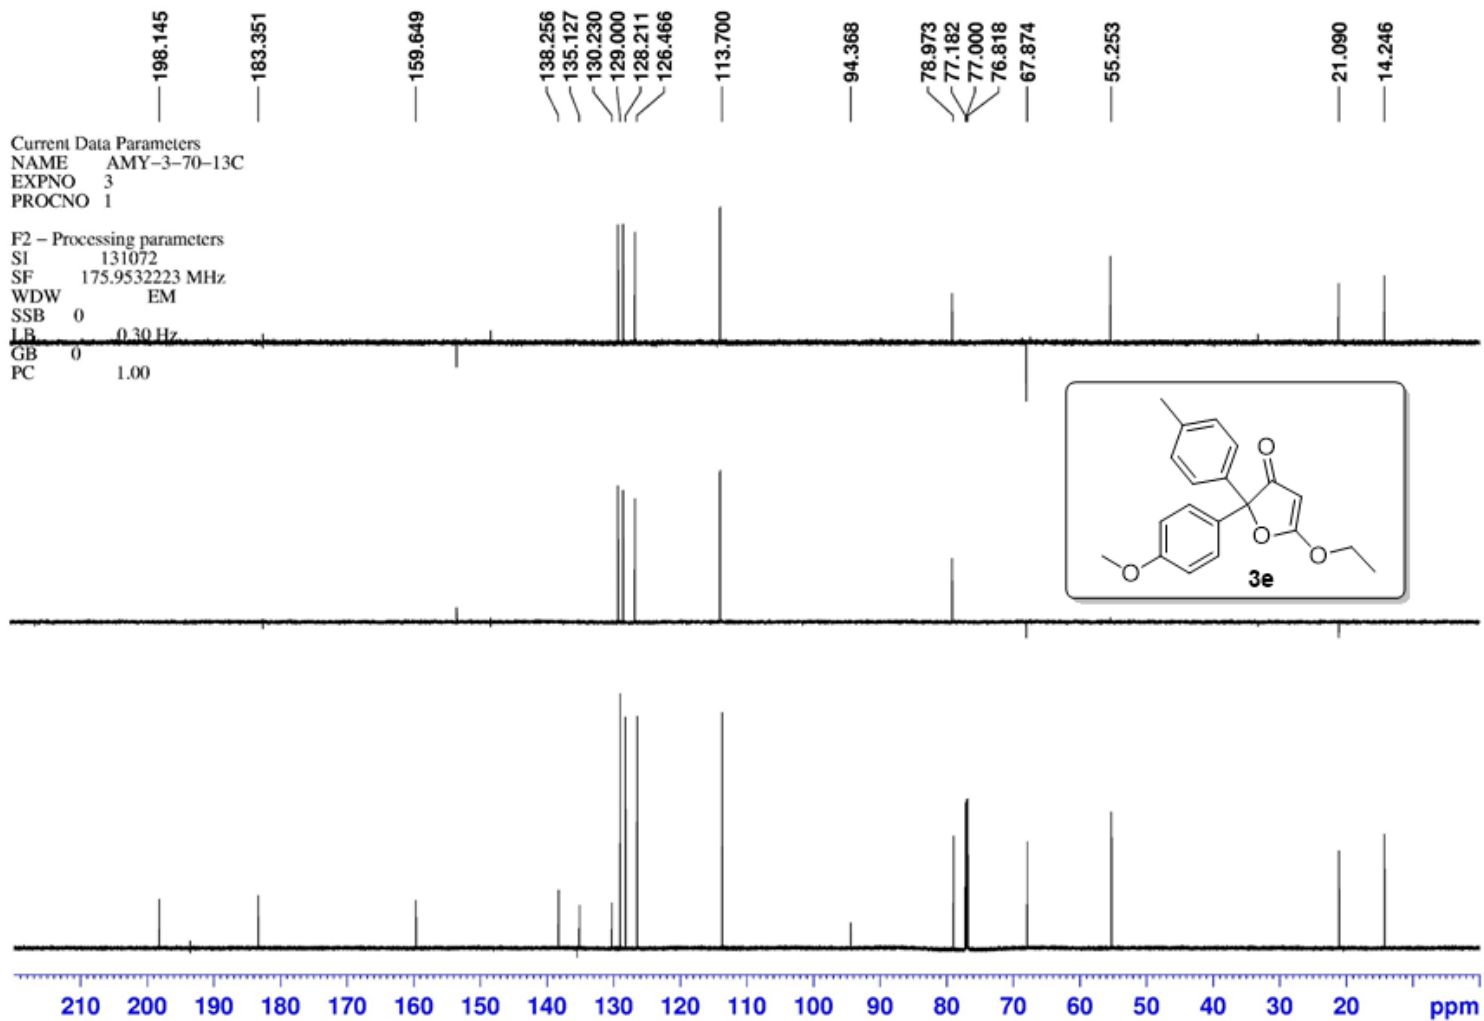

<sup>1</sup>H NMR, 700 MHz  
Solvent: CDCl<sub>3</sub>

7.624  
7.622  
7.619  
7.438  
7.437  
7.427  
7.426  
7.417  
7.416  
7.406  
7.405  
7.352  
7.339  
7.240  
7.201  
7.190  
7.179  
6.860  
6.847

4.801  
4.325  
4.321  
4.315  
4.311  
4.305  
4.301  
4.297  
4.295  
4.291  
3.775

1.573  
1.483  
1.473  
1.463

Current Data Parameters  
NAME AMY-3-69-H.fid  
EXPNO 3  
PROCNO 1  
  
F2 - Processing parameters  
SI 65536  
SF 699.7431001 MHz  
WDW EM  
SSB 0  
LB 0.30 Hz  
GB 0  
PC 1.00

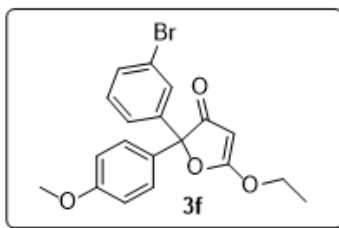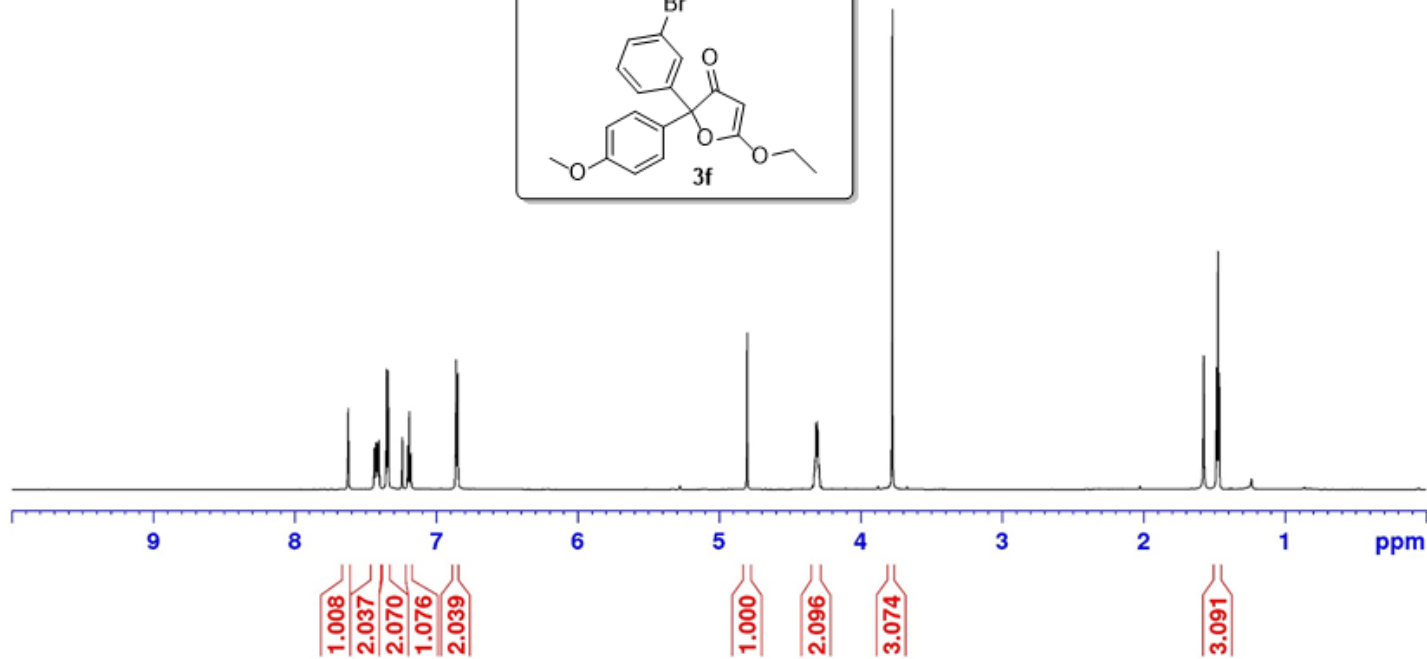



$^{13}\text{C}$  NMR; 175 MHz  
Solvent:  $\text{CDCl}_3$

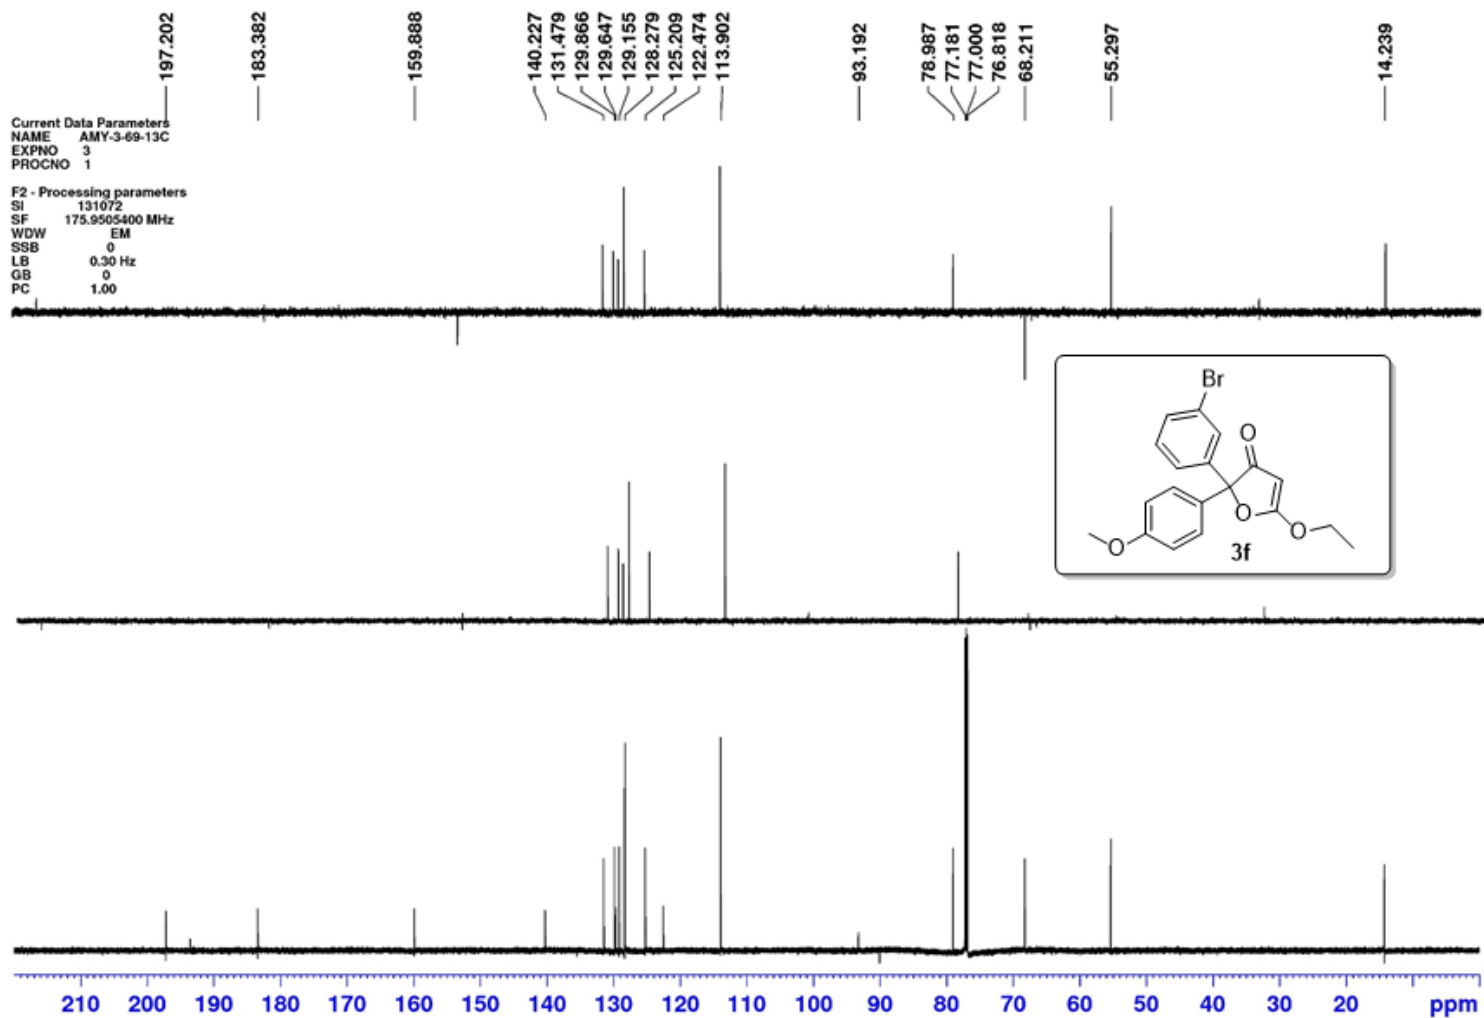

$^1\text{H}$  NMR; 700 MHz

Solvent:  $\text{CDCl}_3$

7.470  
7.468  
7.466  
7.368  
7.366  
7.364  
7.355  
7.345  
7.342  
7.283  
7.281  
7.278  
7.272  
7.270  
7.267  
7.261  
7.250  
7.239  
6.860  
6.857  
6.850  
6.847  
4.802  
4.324  
4.321  
4.318  
4.314  
4.311  
4.304  
4.301  
4.297  
4.294  
4.291

1.596  
1.481  
1.471  
1.460

Current Data Parameters  
NAME AMY-3-63-H.fid  
EXPNO 3  
PROCNO 1  
F2 - Processing parameters  
SI 65536  
SF 699.7431021 MHz  
WDW EM  
SSB 0  
LB 0.30 Hz  
GB 0  
PC 1.00

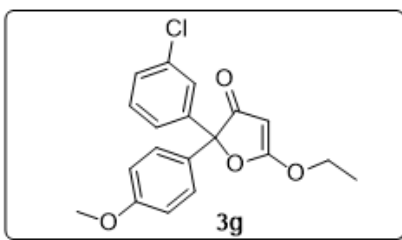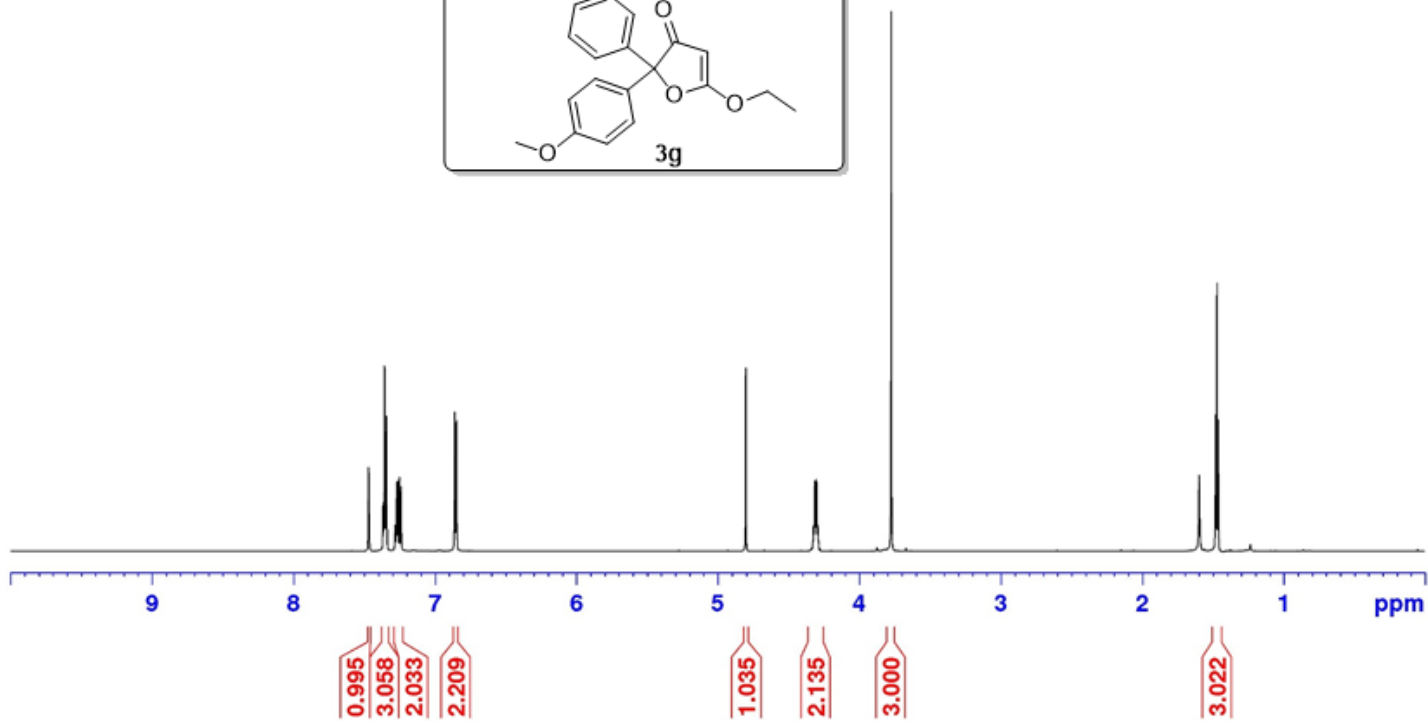

$^{13}\text{C}$  NMR: 175 MHz  
Solvent:  $\text{CDCl}_3$

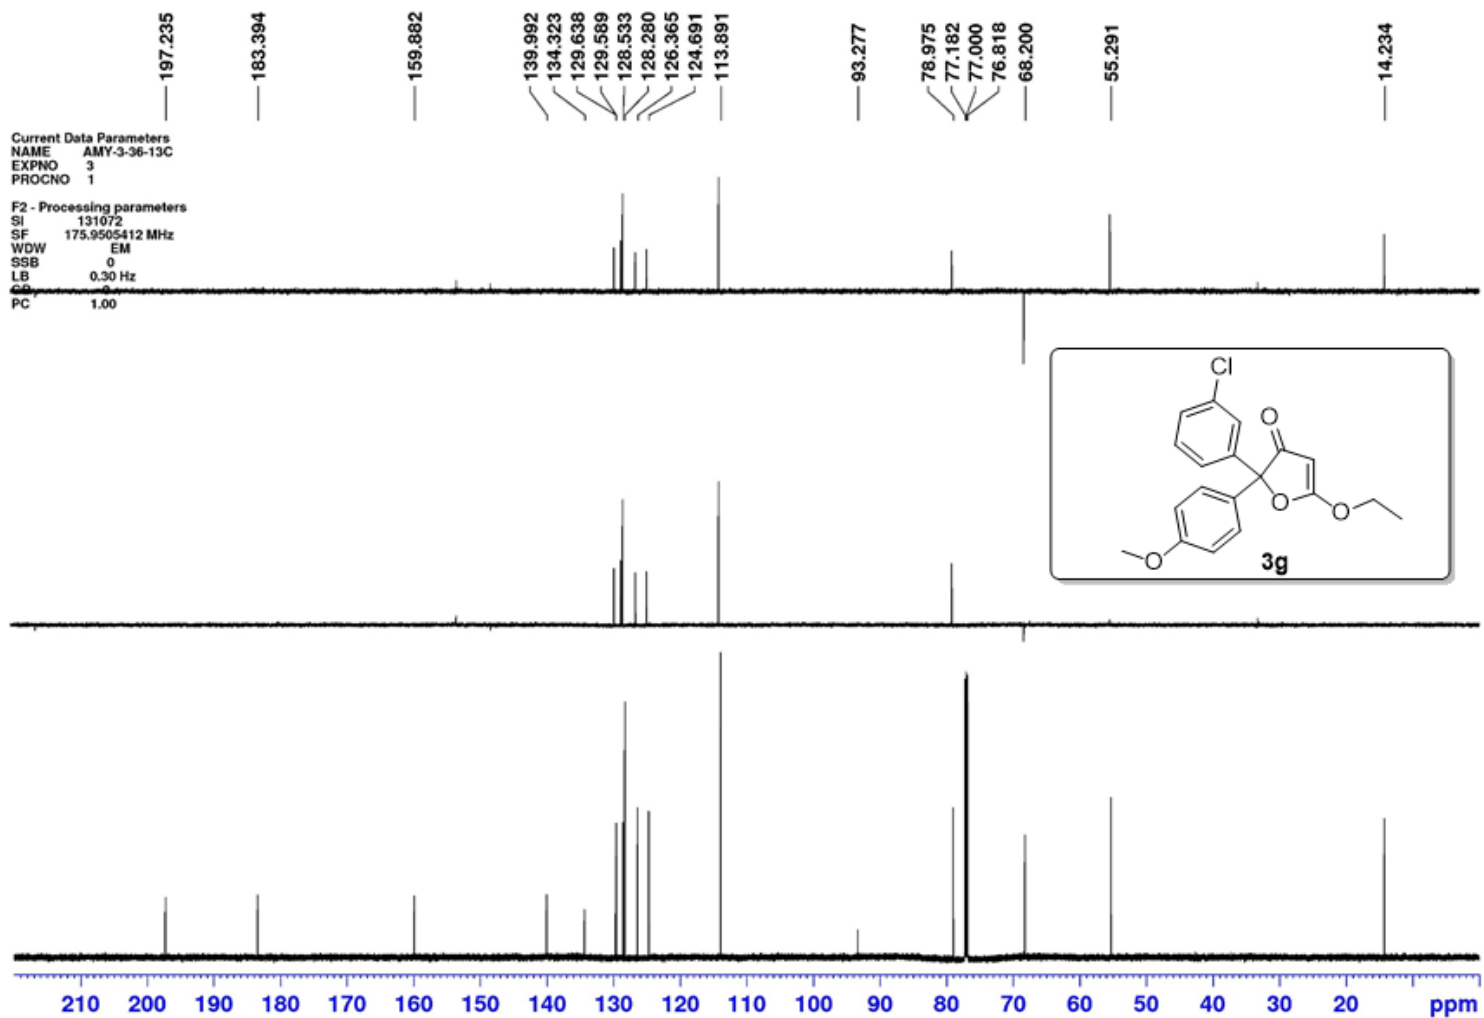

$^1\text{H}$  NMR, 700 MHz  
Solvent:  $\text{CDCl}_3$

Current Data Parameters  
NAME AMY-3-62-H.fid  
EXPNO 1  
PROCNO 1  
F2 - Processing parameters  
SI 65536  
SF 699.7431063 MHz  
WDW EM  
SSB 0  
LB 0.30 Hz  
GB 0  
PC 1.00

7.364  
7.351  
7.253  
7.240  
7.215  
7.204  
7.194  
7.110  
7.100  
6.849  
6.836

4.795  
4.307  
4.297  
4.287  
4.277  
3.764

2.303  
1.647  
1.464  
1.453  
1.443  
1.234

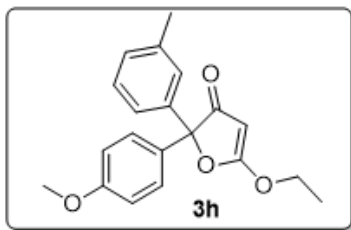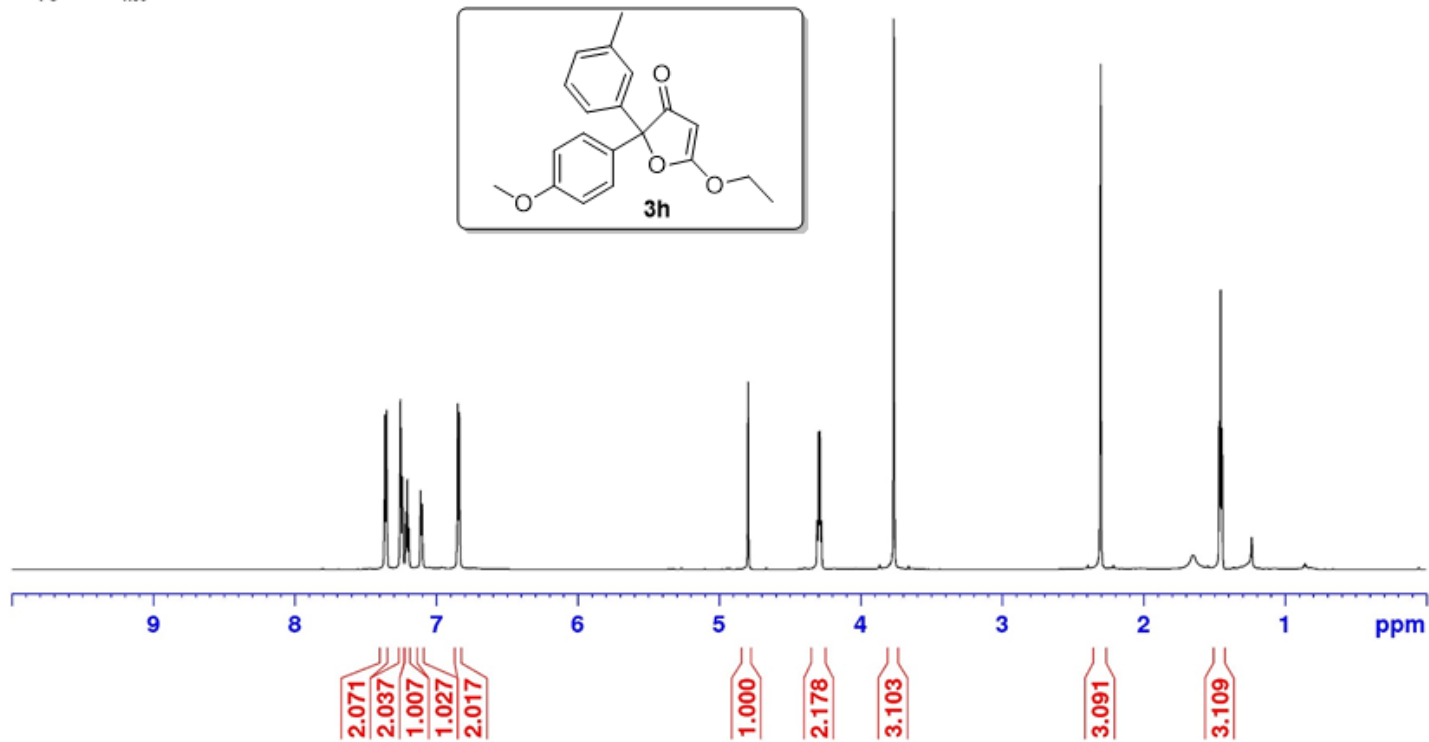

$^{13}\text{C}$  NMR; 175 MHz  
Solvent:  $\text{CDCl}_3$

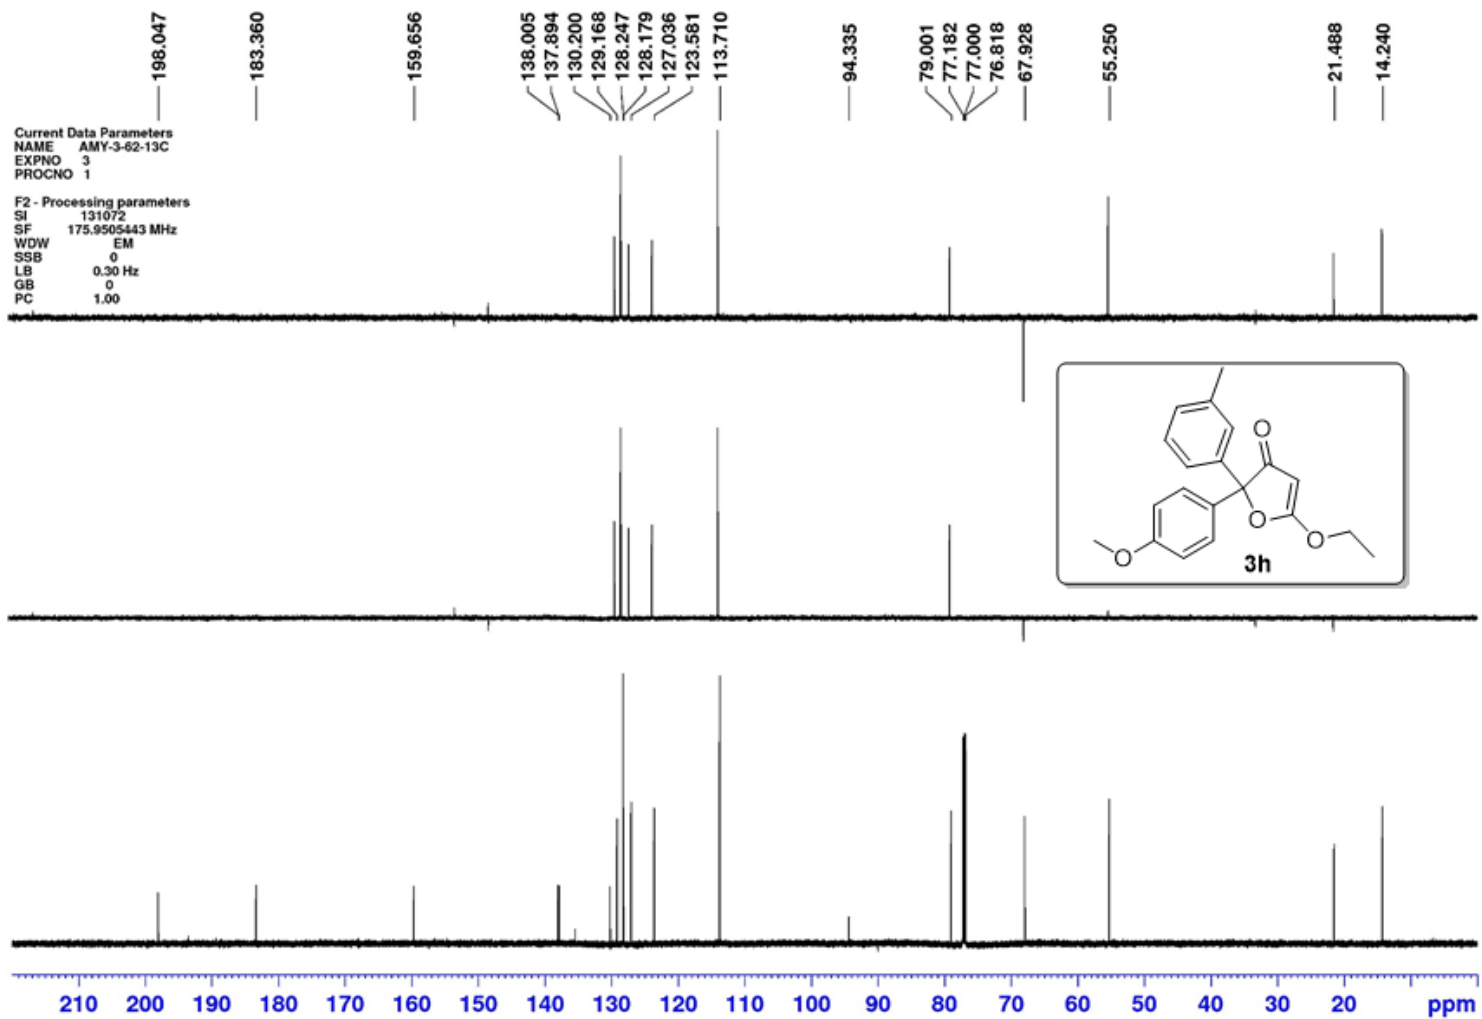

$^1\text{H}$  NMR, 700 MHz  
Solvent:  $\text{CDCl}_3$

7.664  
7.653  
7.610  
7.598  
7.298  
7.287  
7.240  
7.213  
7.202  
7.180  
7.167  
6.852  
6.839

4.830  
4.373  
4.363  
4.353  
4.345  
4.343  
3.769

1.579  
1.483  
1.473  
1.462

Current Data Parameters  
NAME AMY-3-71-H.fid  
EXPNO 1  
PROCNO 1

F2 - Processing parameters  
SI 65536  
SF 699.7438009 MHz  
WDW EM  
SSB 0  
LB 0.30 Hz  
GB 0  
PC 1.00

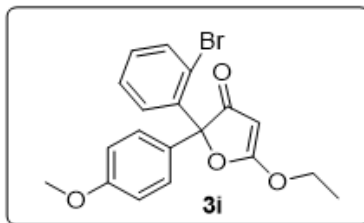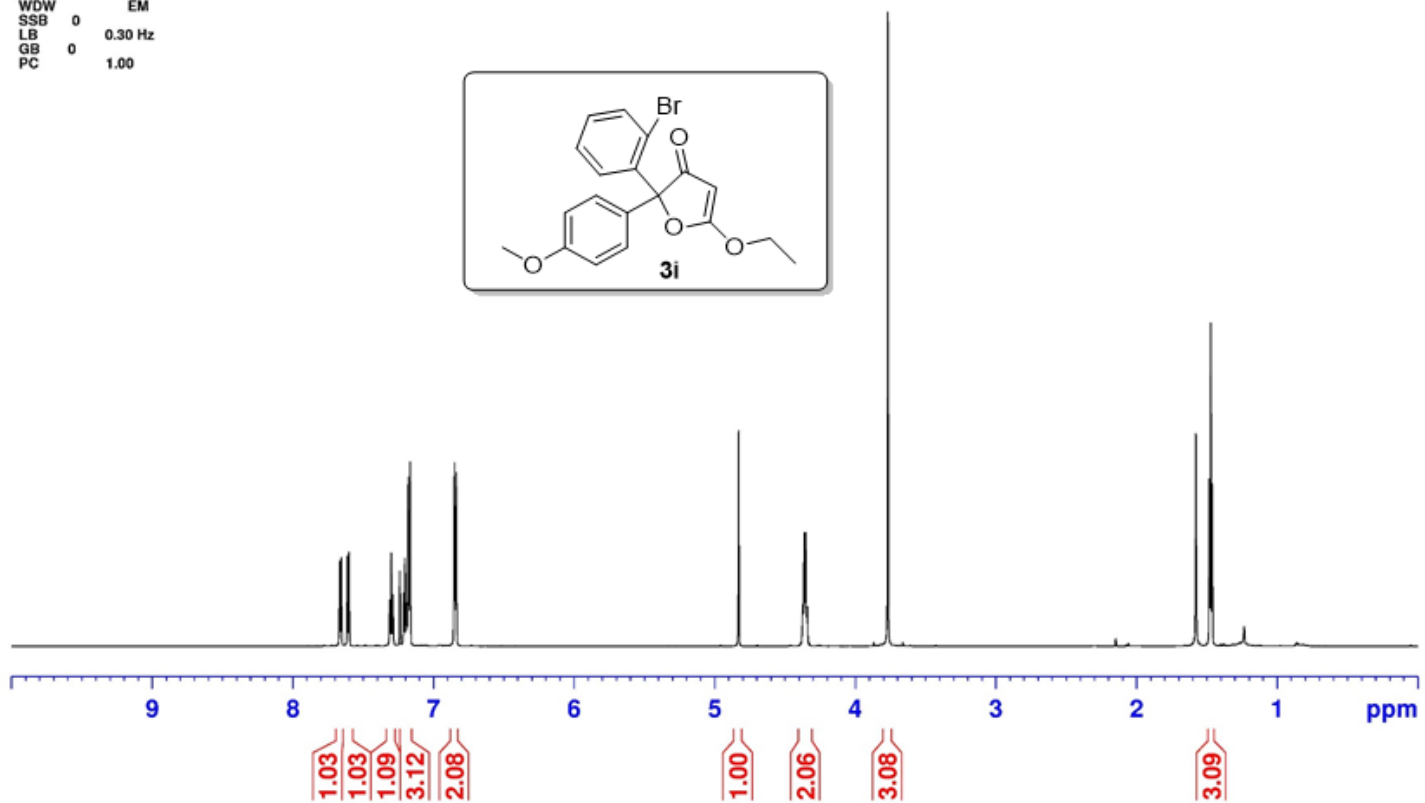

$^{13}\text{C}$  NMR: 175 MHz

Solvent:  $\text{CDCl}_3$

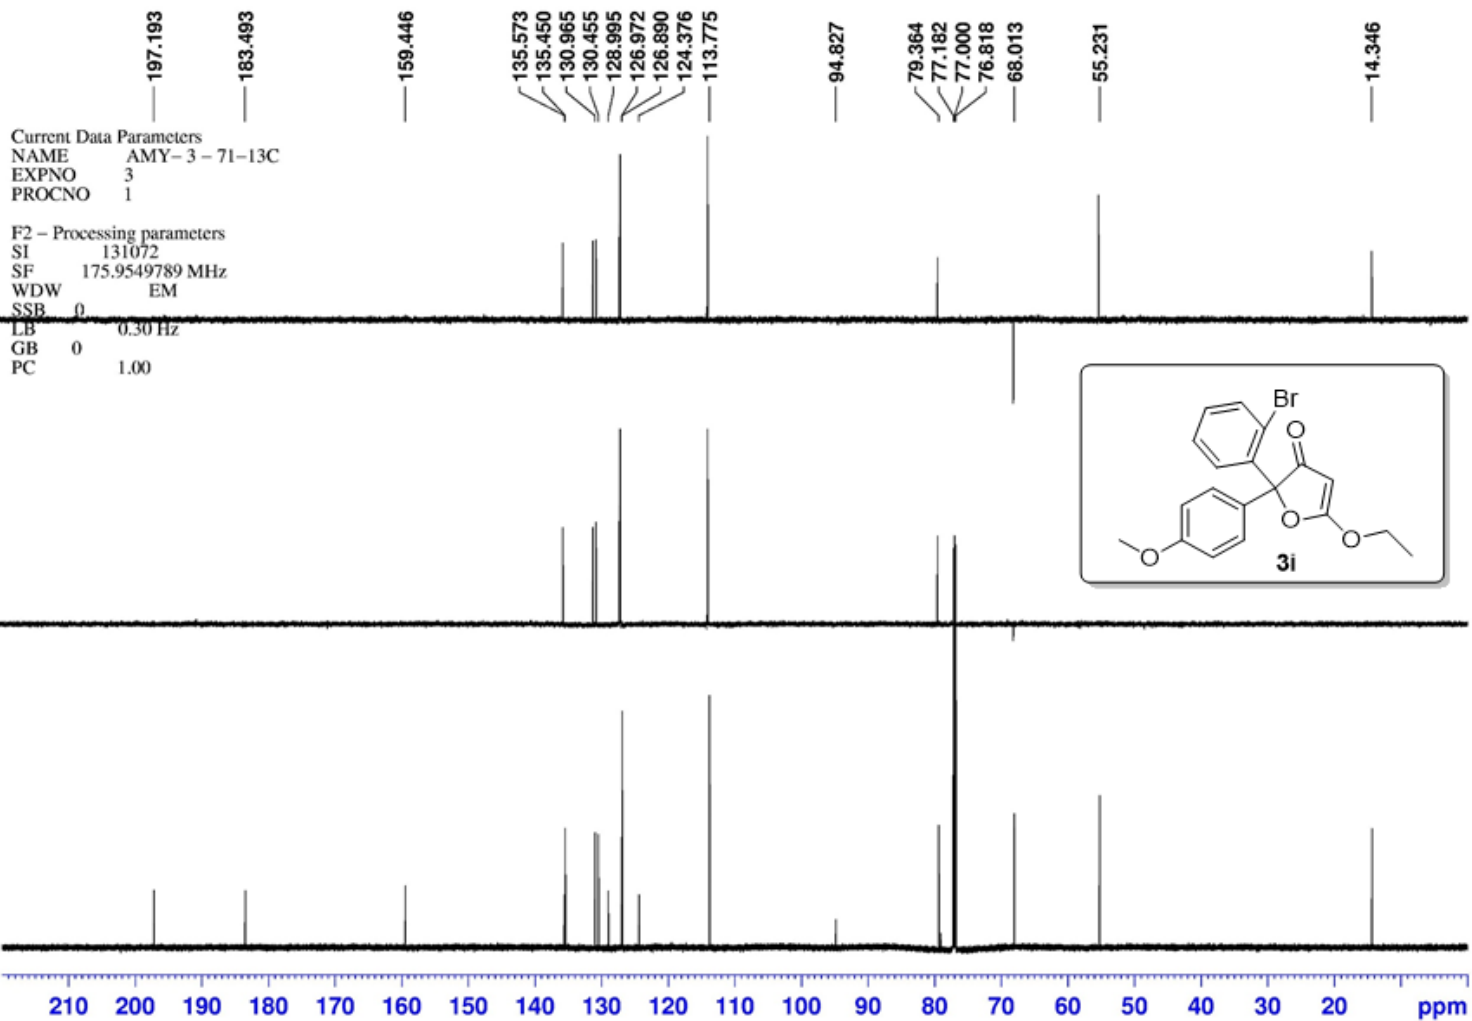

$^1\text{H}$  NMR; 700 MHz

Solvent:  $\text{CDCl}_3$

7.995  
7.829  
7.821  
7.815  
7.798  
7.786  
7.531  
7.529  
7.519  
7.516  
7.471  
7.469  
7.465  
7.461  
7.458  
7.397  
7.384  
7.240  
6.864  
6.852

4.853  
4.344  
4.334  
4.324  
4.314  
3.775

1.584  
1.491  
1.481  
1.471  
1.239

Current Data Parameters  
NAME AMY-3-43-H.fid  
EXPNO 3  
PROCNO 1

F2 - Processing parameters  
SI 65536  
SF 699.7431007 MHz  
WDW EM  
SSB 0  
LB 0.30 Hz  
GB 0  
PC 1.00

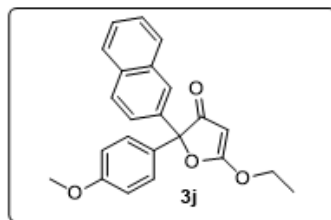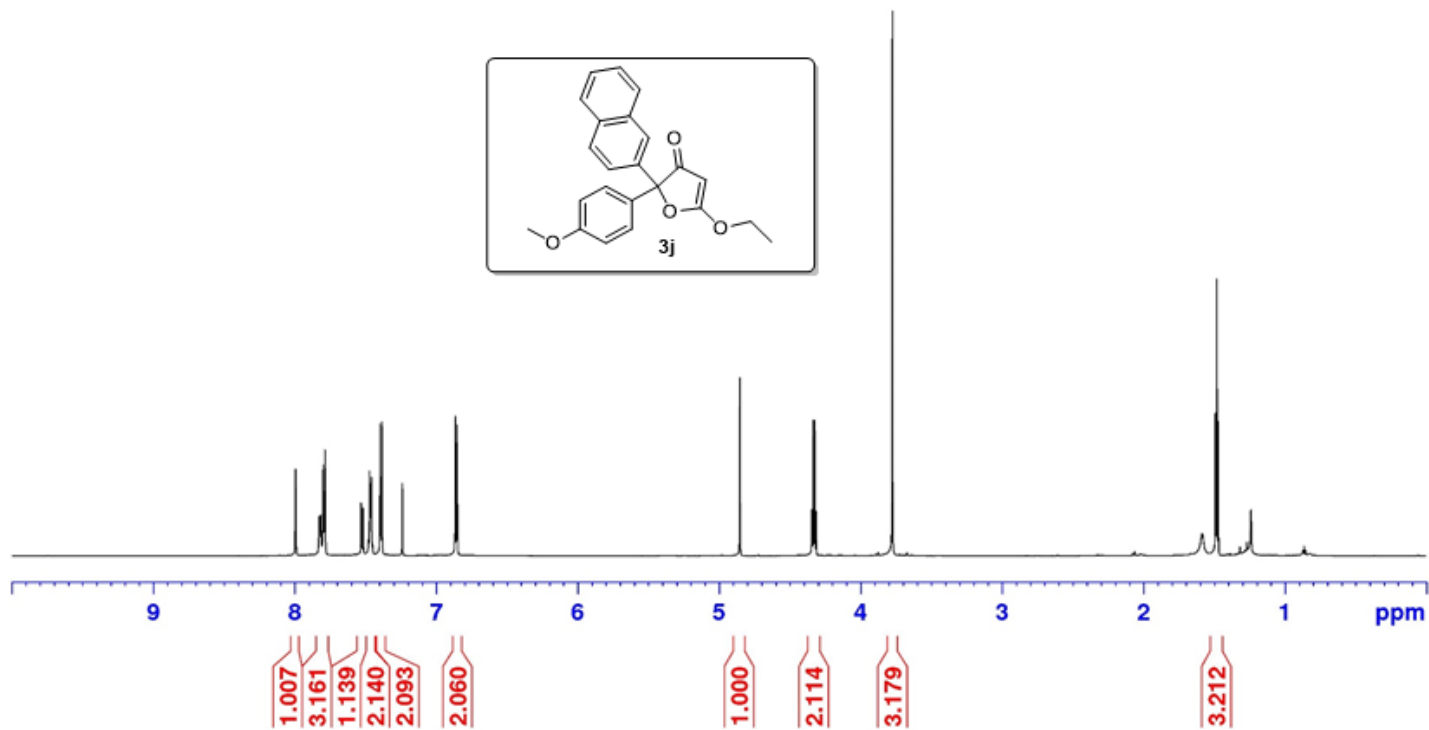



$^{13}\text{C}$  NMR; 175 MHz  
Solvent:  $\text{CDCl}_3$

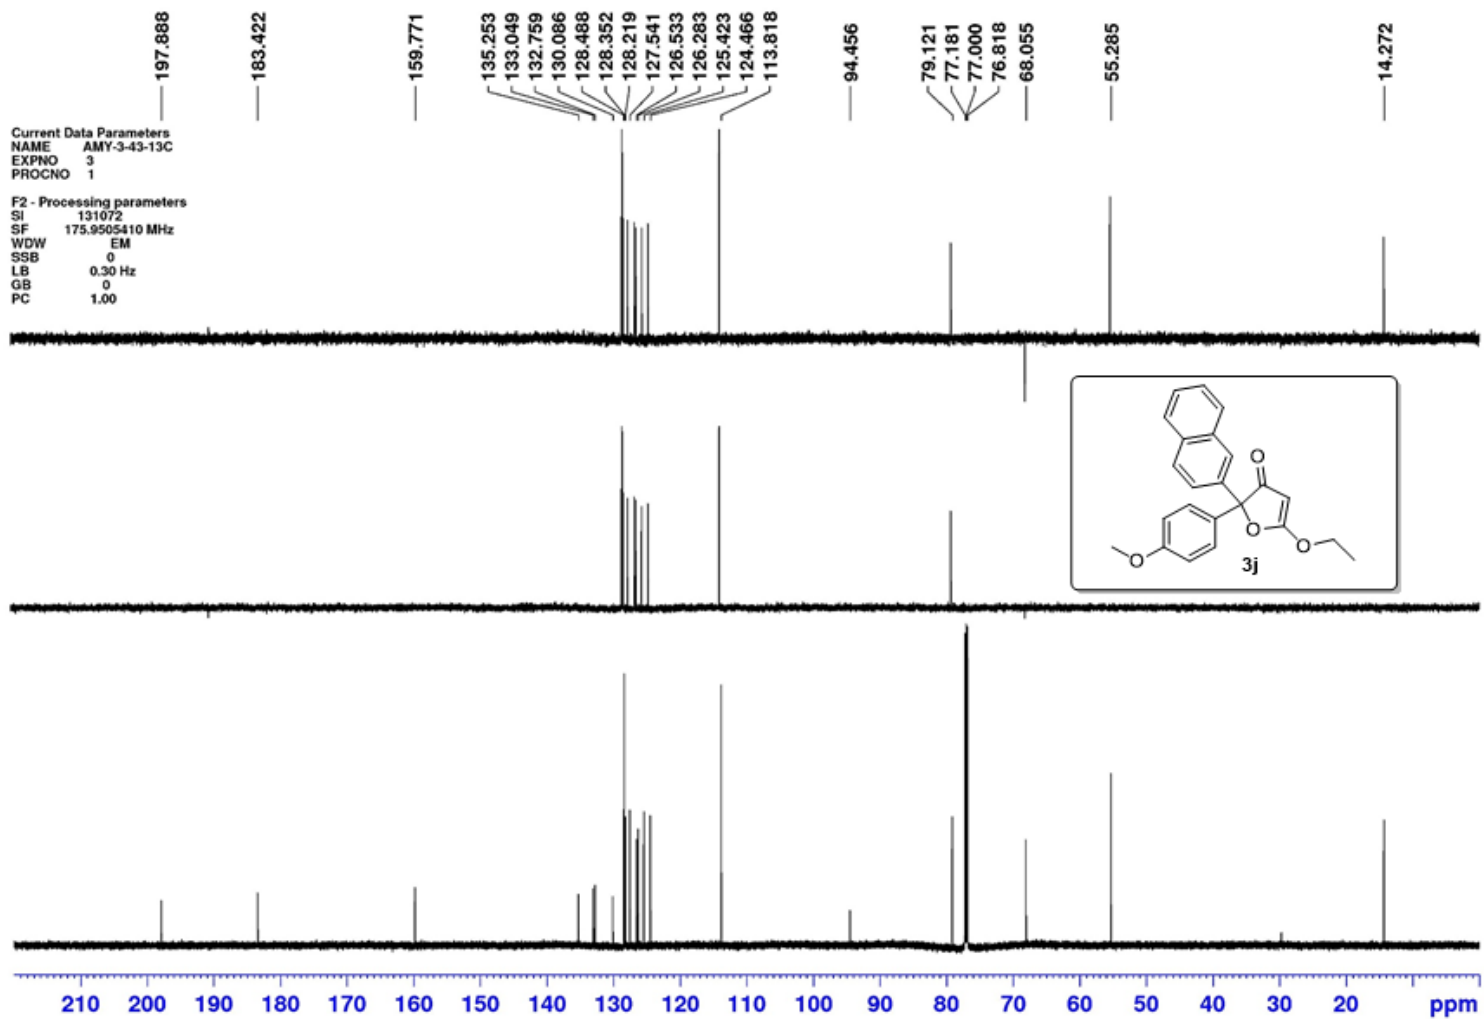

$^1\text{H}$  NMR; 700 MHz  
Solvent:  $\text{CDCl}_3$

7.450  
7.437  
7.240  
6.862  
6.849

4.686  
4.262  
4.274  
4.272  
4.264  
3.770

2.064  
2.048  
2.034  
2.028  
1.582  
1.477  
1.467  
1.457  
1.301  
1.298  
1.294  
1.291  
1.285  
1.275  
1.268  
1.263  
1.232  
0.847

Current Data Parameters  
NAME AMY-3-116-H.fid  
EXPNO 1  
PROCNO 1

F2 - Processing parameters  
SI 65536  
SF 699.7430985 MHz  
WDW EM  
SSB 0  
LB 0.30 Hz  
GB 0  
PC 1.00

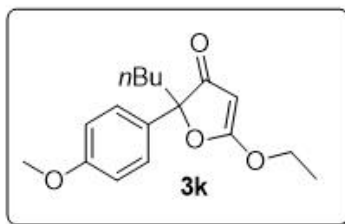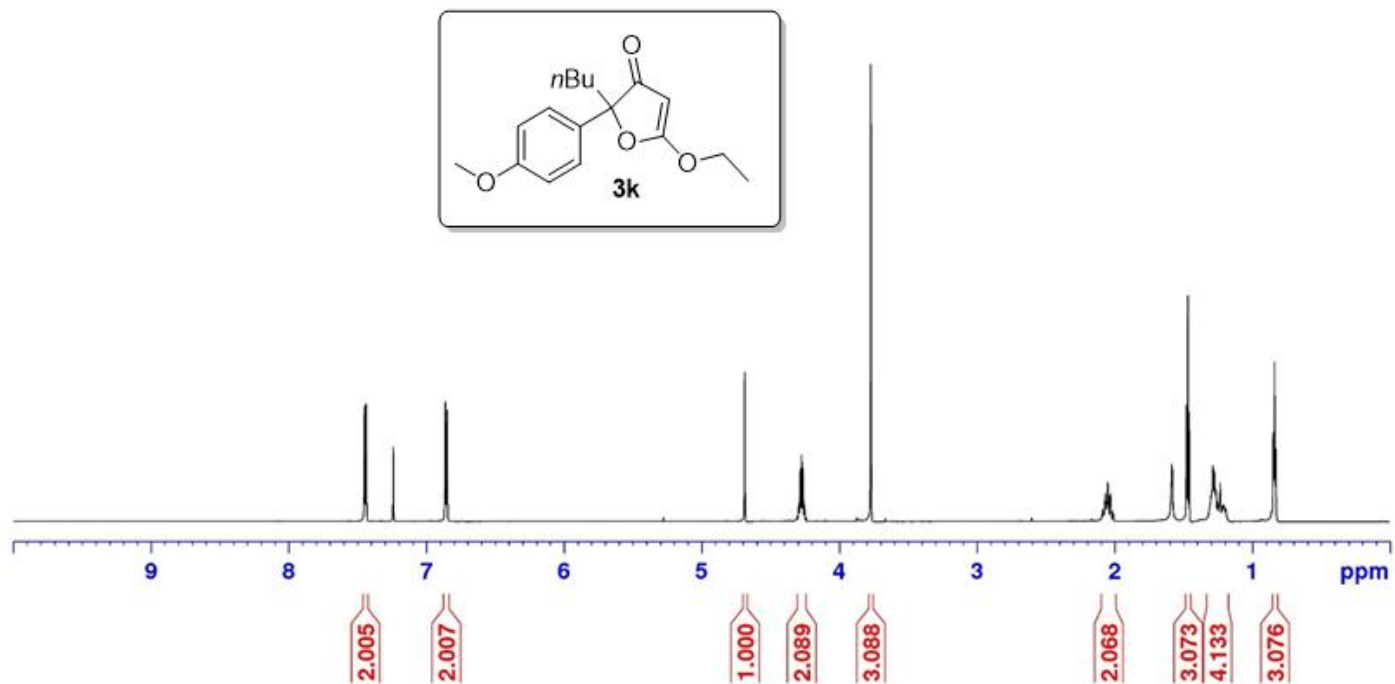

$^{13}\text{C}$  NMR, 175 MHz  
Solvent:  $\text{CDCl}_3$

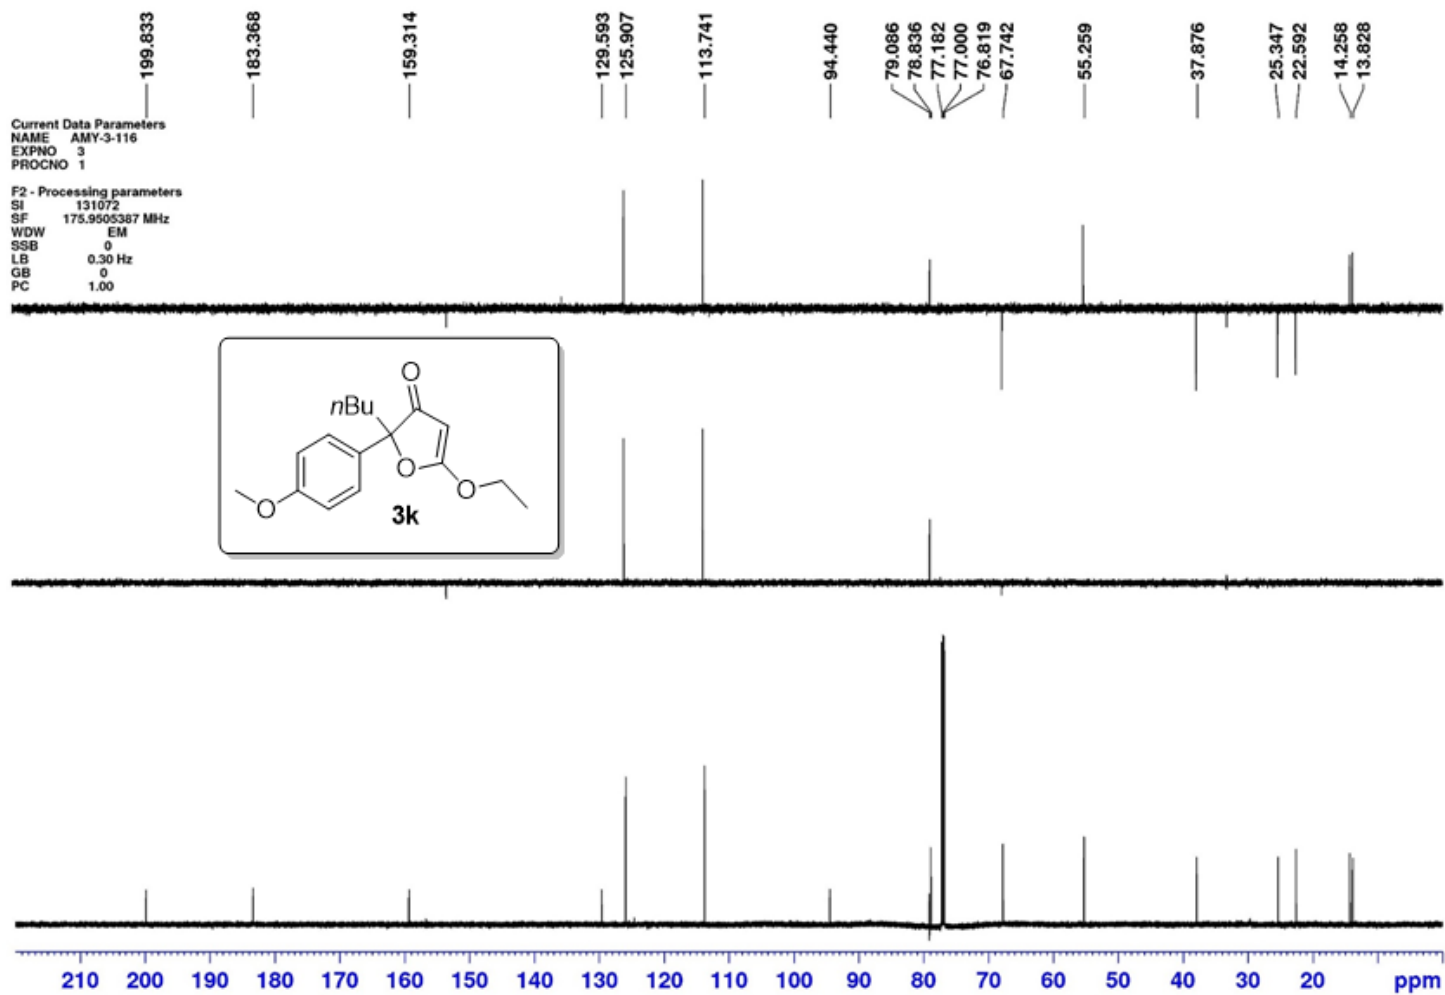

$^1\text{H}$  NMR; 700 MHz  
Solvent:  $\text{CDCl}_3$

7.418  
7.406  
7.240  
6.866  
6.853

4.701  
4.293  
4.282  
4.272  
4.262  
3.770

1.758  
1.622  
1.468  
1.458  
1.448

DB-02-260

Current Data Parameters  
NAME DB-02-260-H.fid  
EXPNO 1  
PROCNO 1

F2 - Processing parameters  
SI 65536  
SF 699.7441491 MHz  
WDW EM  
SSB 0  
LB 0.30 Hz  
GB 0  
PC 1.00

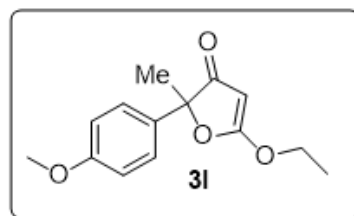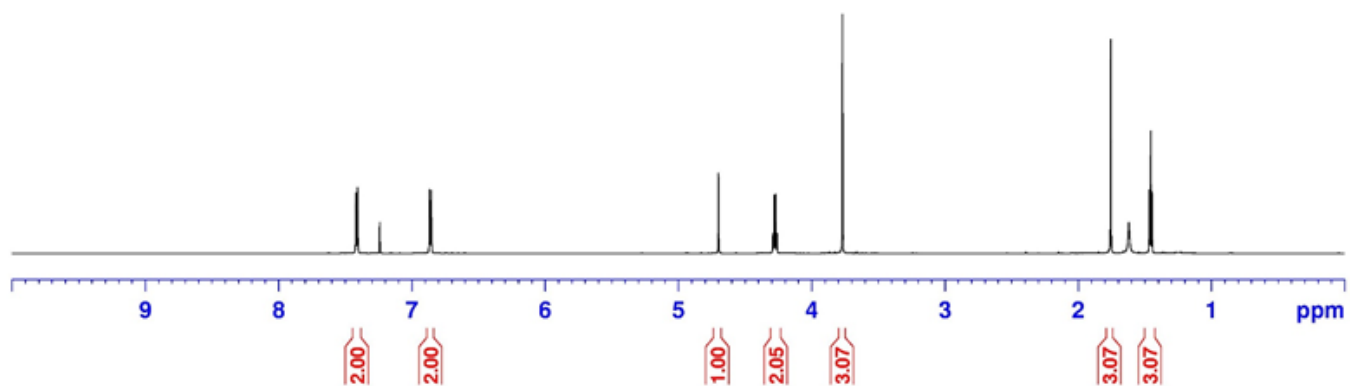

$^{13}\text{C}$  NMR; 175 MHz  
Solvent:  $\text{CDCl}_3$

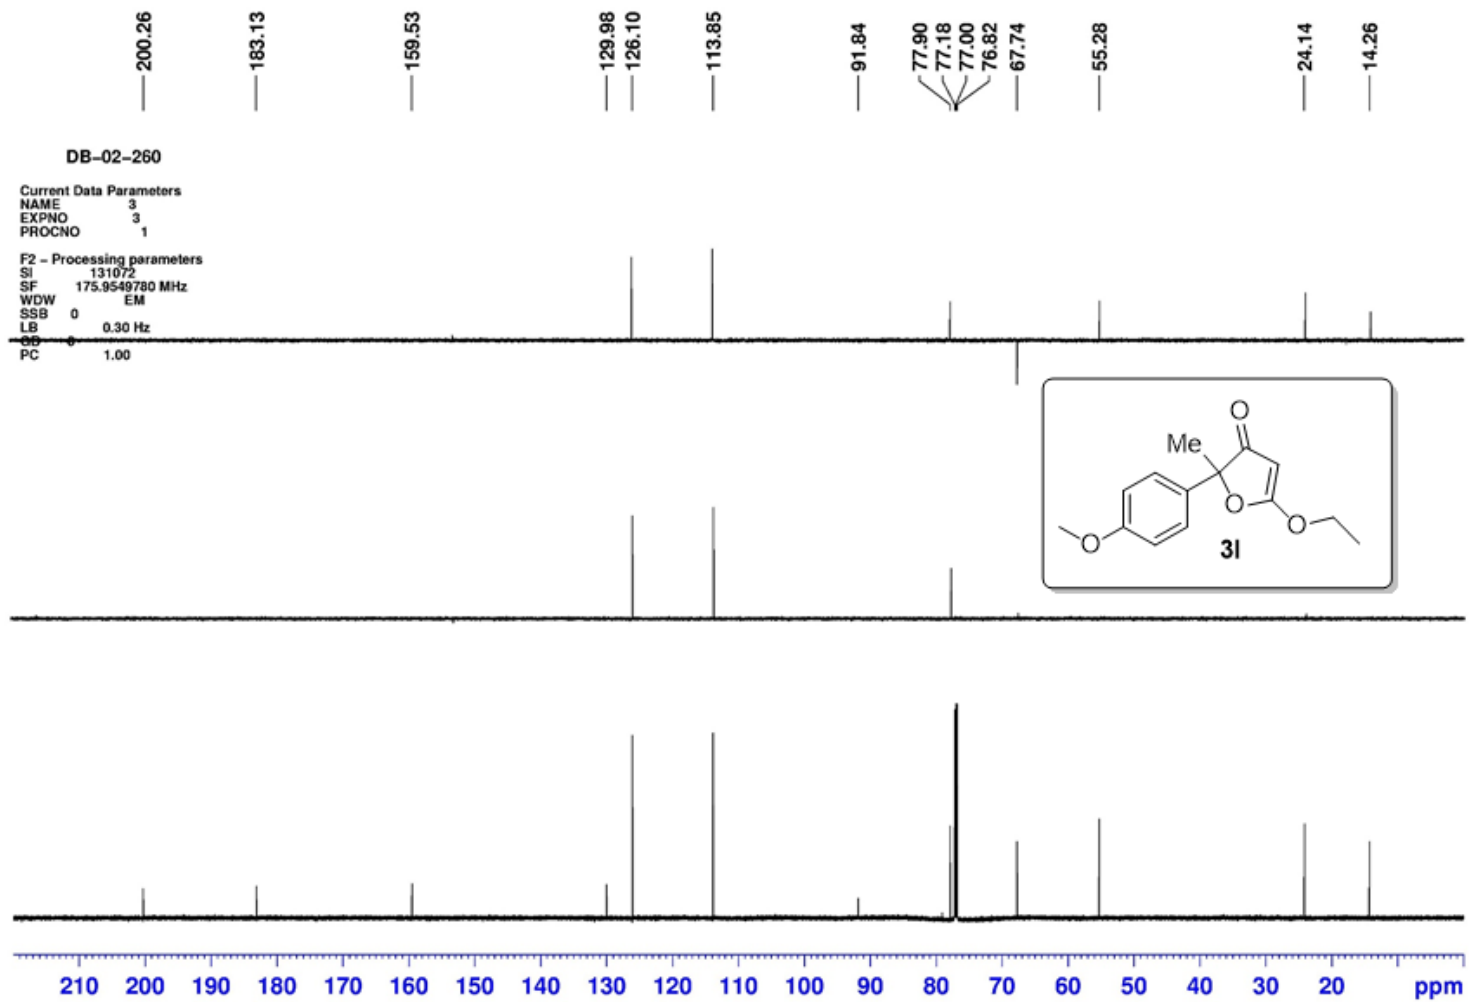

$^1\text{H}$  NMR; 700 MHz  
Solvent:  $\text{CDCl}_3$

7.481  
7.479  
7.470  
7.344  
7.342  
7.332  
7.321  
7.317  
7.315  
7.309  
7.305  
7.296  
7.295  
7.240

4.815  
4.327  
4.317  
4.307  
4.297

1.606  
1.480  
1.469  
1.459  
1.238

Current Data Parameters  
NAME AMY-3-58-1H  
EXPNO 1  
PROCNO 1  
F2 - Processing parameters  
SI 65536  
SF 699.7431000 MHz  
WDW EM  
SSB 0  
LB 0.30 Hz  
GB 0  
PC 1.00

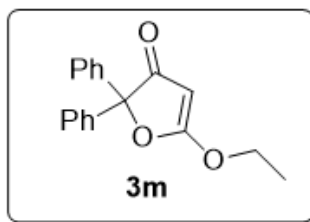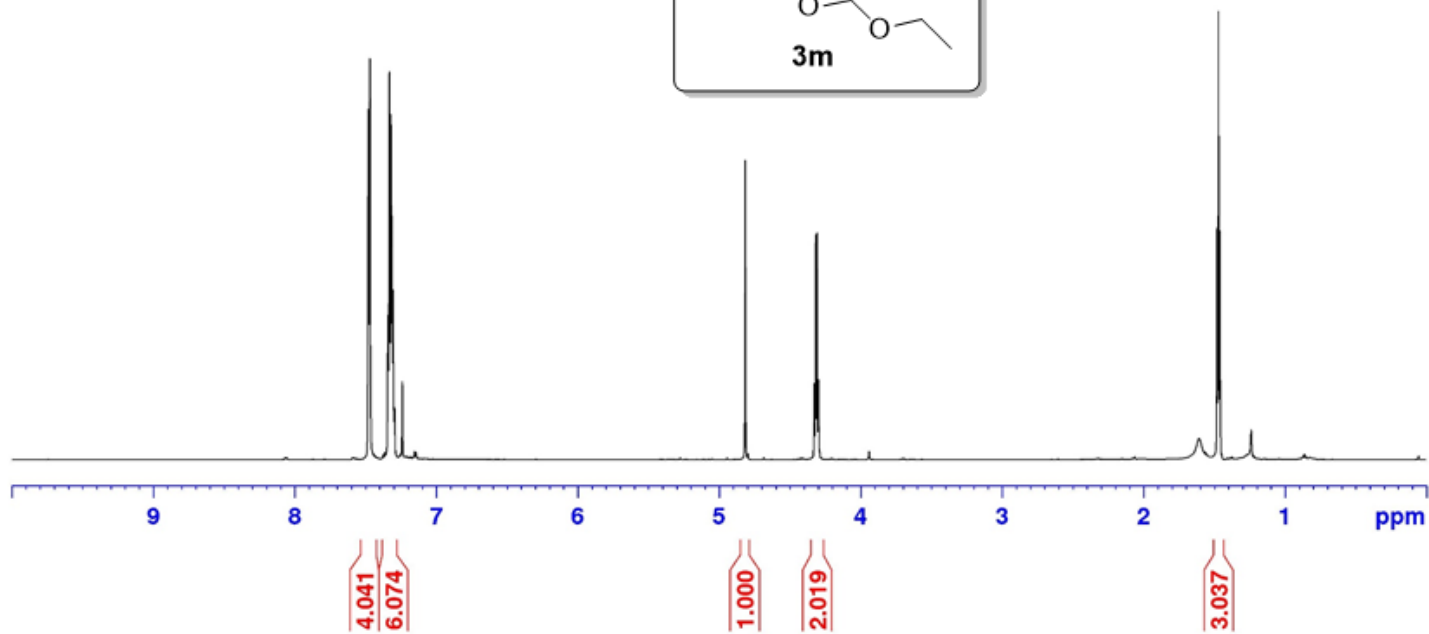

$^{13}\text{C}$  NMR; 175 MHz  
Solvent:  $\text{CDCl}_3$

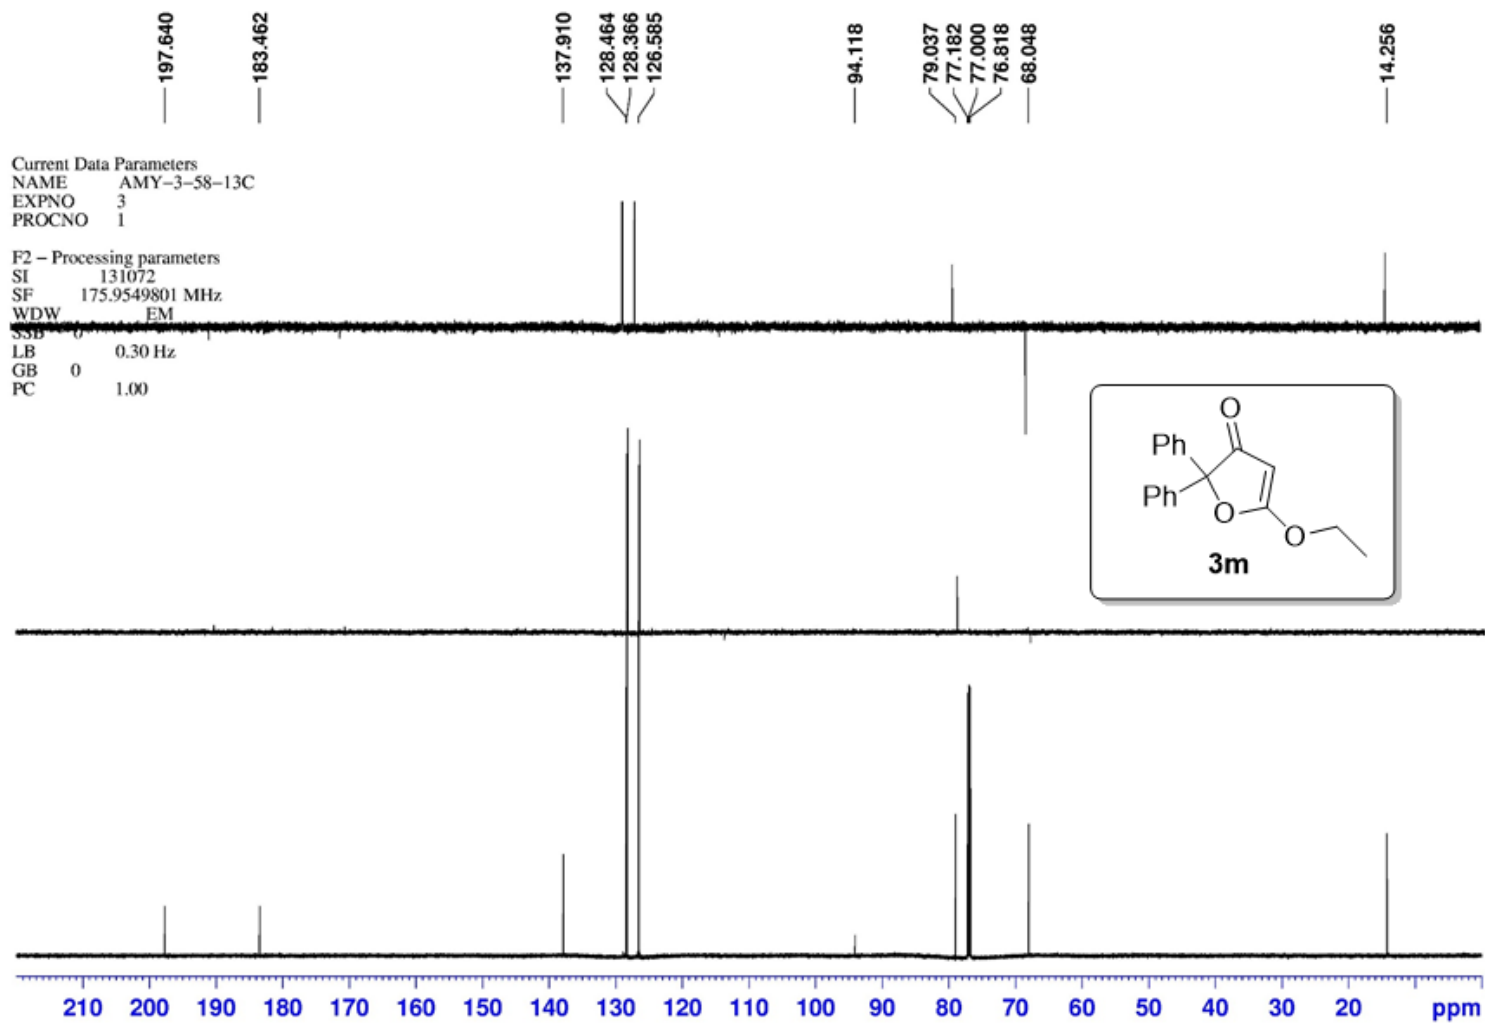

$^1\text{H}$  NMR; 700 MHz  
Solvent:  $\text{CDCl}_3$

7.477  
7.475  
7.465  
7.355  
7.344  
7.338  
7.336  
7.326  
7.315  
7.308  
7.301  
7.298  
7.240  
7.145  
7.134

4.805  
4.317  
4.307  
4.297  
4.287

2.317

1.649  
1.471  
1.461  
1.451

Current Data Parameters  
NAME AMY-3-75-H.fid  
EXPNO 1  
PROCNO 1

F2 - Processing parameters  
SI 65536  
SF 699.7441505 MHz  
WDW EM  
SSB 0  
LB 0.30 Hz  
GB 0  
PC 1.00

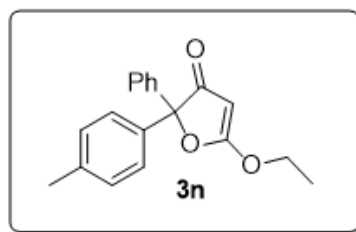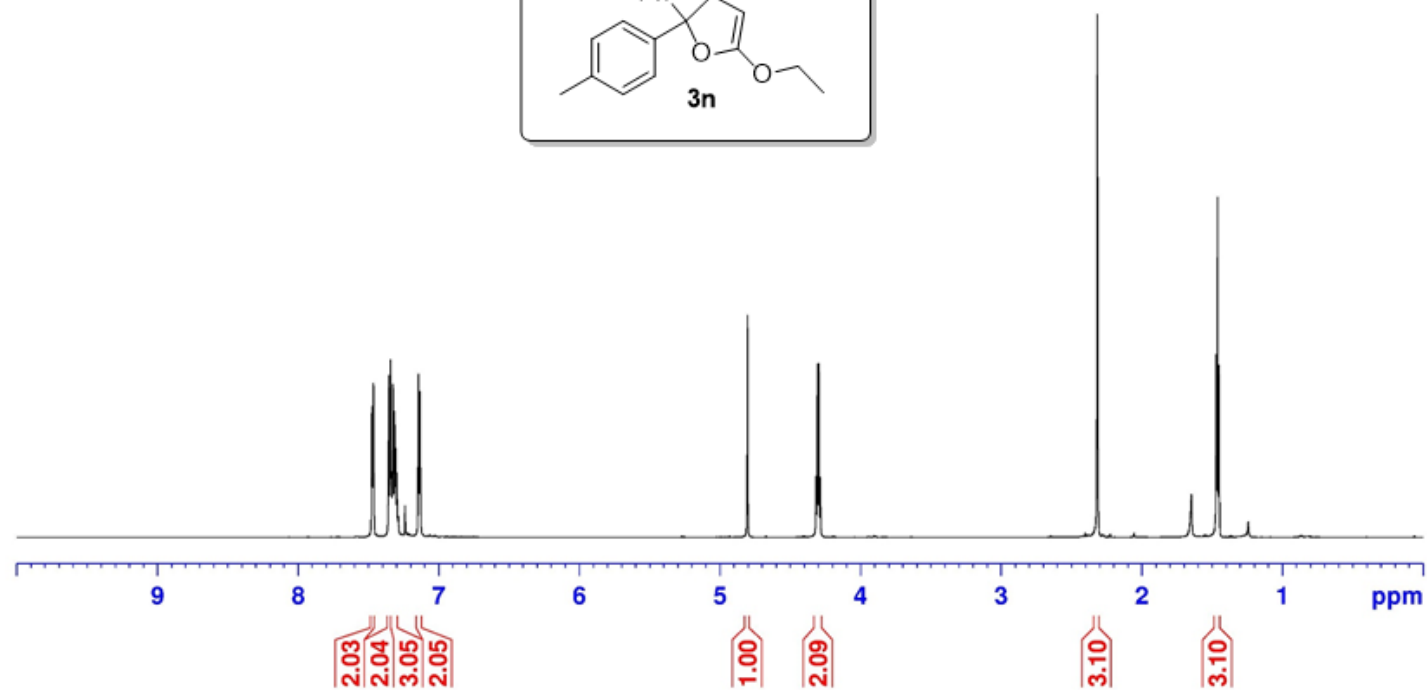



$^{13}\text{C}$  NMR; 175 MHz

Solvent:  $\text{CDCl}_3$

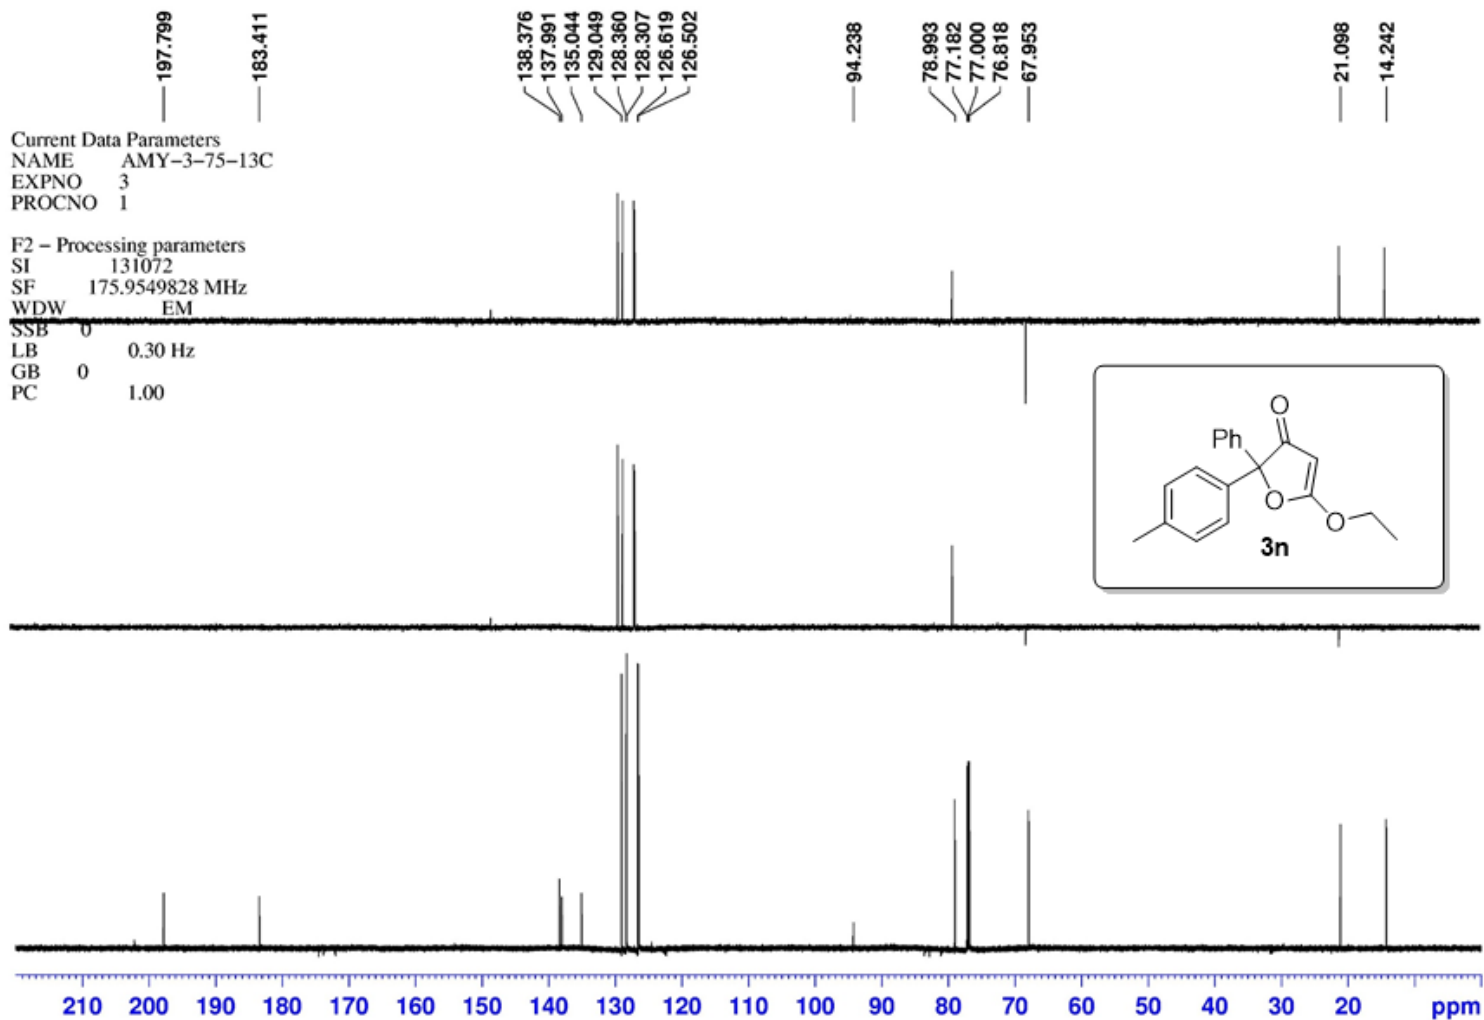

$^1\text{H}$  NMR; 700 MHz  
Solvent:  $\text{CDCl}_3$

7.480  
7.477  
7.466  
7.458  
7.453  
7.445  
7.442  
7.344  
7.335  
7.323  
7.321  
7.311  
7.303  
7.240  
7.025  
7.013  
7.001

4.814  
4.325  
4.315  
4.305  
4.295

1.645  
1.480  
1.470  
1.460

Current Data Parameters  
NAME AMY-3-76-H.fid  
EXPNO 1  
PROCNO 1  
F2 - Processing parameters  
SI 65536  
SF 699.7431012 MHz  
WDW EM  
SSB 0  
LB 0.30 Hz  
GB 0  
PC 1.00

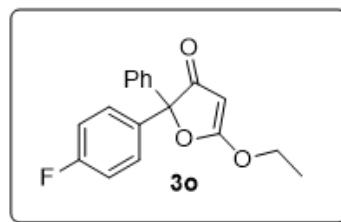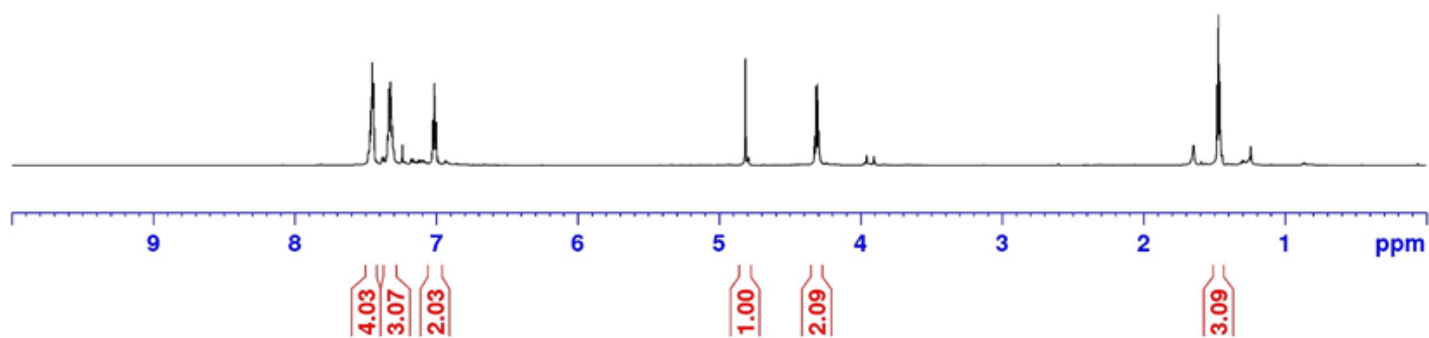

$^{13}\text{C}$  NMR; 175 MHz  
Solvent:  $\text{CDCl}_3$

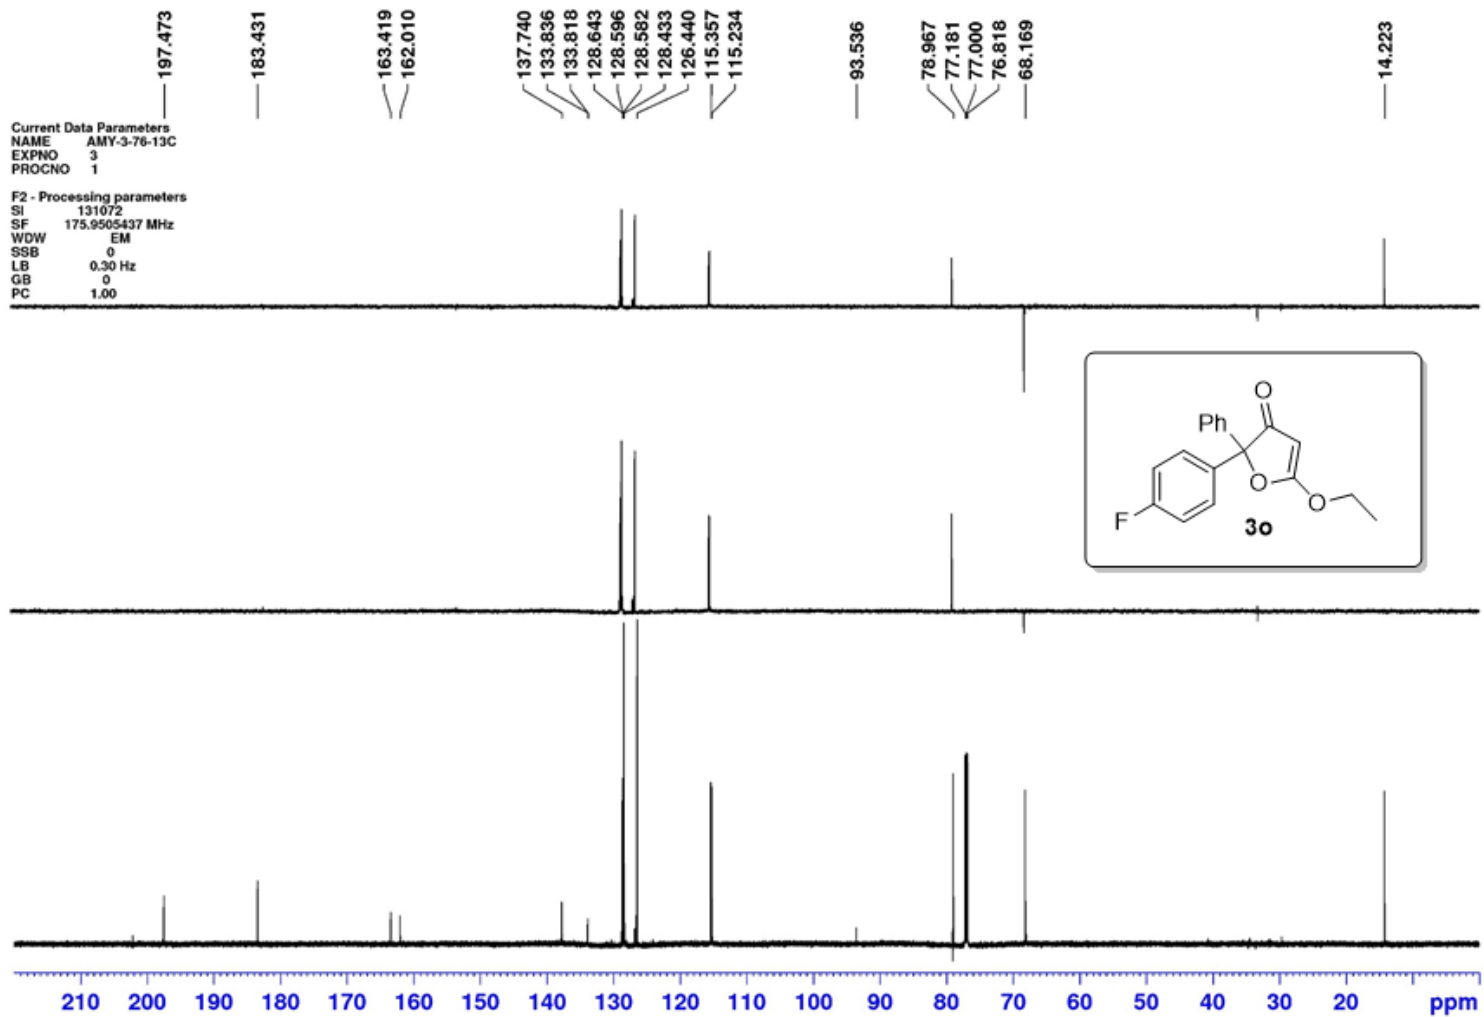

$^{19}\text{F}$  NMR; 500 MHz  
Solvent:  $\text{CDCl}_3$

— -112.093

Current Data Parameters  
NAME iou221004.101  
EXPNO 2  
PROCNO 1

F2 - Acquisition Parameters  
Date\_ 20221004  
Time 10.46 h  
INSTRUM spect  
PROBHD Z119470\_0234 (  
PULPROG zgfhigqn.2  
TD 131072  
SOLVENT  $\text{CDCl}_3$   
NS 128  
DS 4  
SWH 163043.484 Hz  
FIDRES 1.243923 Hz  
AQ 0.4019541 sec  
RG 191.01  
DW 3.067 usec  
DE 6.50 usec  
TE 296.9 K  
D1 1.0000000 sec  
D11 0.0300000 sec  
D12 0.0002000 sec  
TD0 1  
SFO1 470.5735434 MHz  
NUC1  $^{19}\text{F}$   
P1 15.00 usec  
PLW1 49.5000000 W  
SFO2 500.1620006 MHz  
NUC2  $^1\text{H}$   
CPDPRG2 waltz16  
PCPD2 80.00 usec  
PLW2 30.0000000 W  
PLW12 0.46875000 W

F2 - Processing parameters  
SI 65536  
SF 470.6206054 MHz  
WDW EM  
SSB 0

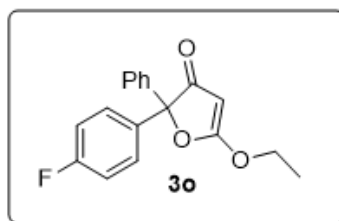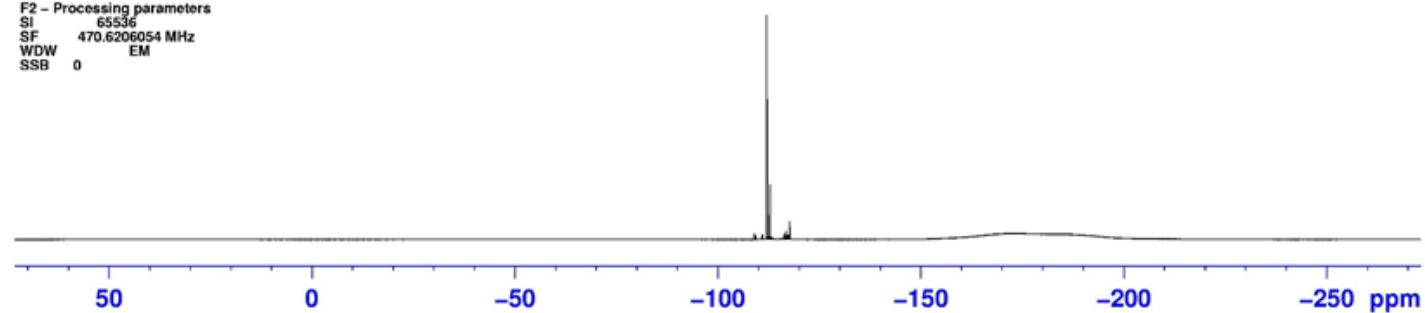

$^1\text{H}$  NMR; 700 MHz  
Solvent:  $\text{CDCl}_3$

7.449  
7.447  
7.435  
7.422  
7.346  
7.342  
7.334  
7.323  
7.307  
7.295  
7.240

4.809  
4.325  
4.314  
4.304  
4.294

1.623  
1.481  
1.471  
1.461

Current Data Parameters  
NAME AMY-3-111-H.fid  
EXPNO 1  
PROCNO 1  
F2 - Processing parameters  
SI 65536  
SF 699.7438021 MHz  
WDW EM  
SSB 0  
LB 0.30 Hz  
GB 0  
PC 1.00

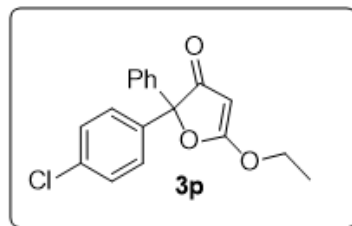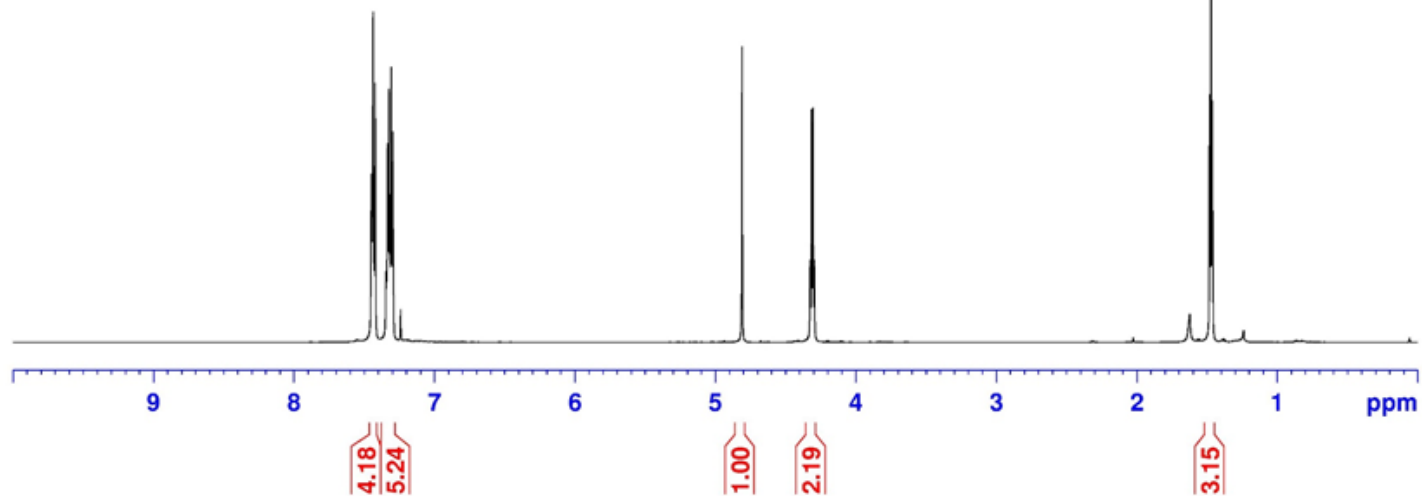

$^{13}\text{C}$  NMR; 175 MHz  
Solvent:  $\text{CDCl}_3$

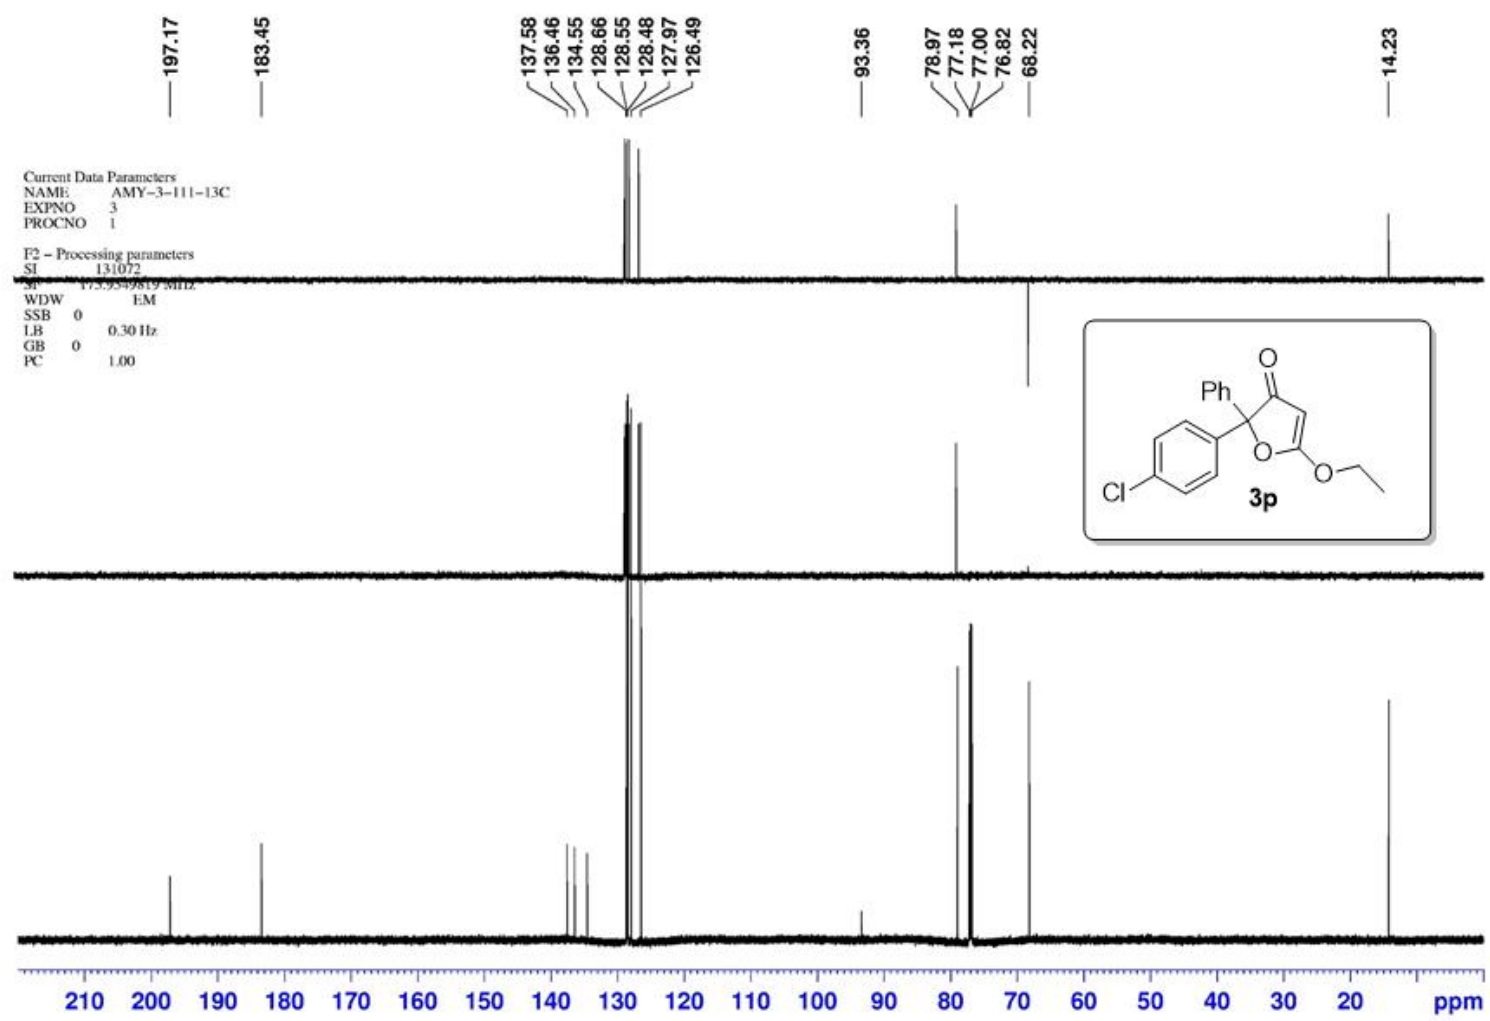

$^1\text{H}$  NMR; 700 MHz  
Solvent:  $\text{CDCl}_3$

7.471  
7.461  
7.339  
7.329  
7.318  
7.312  
7.305  
7.302  
7.276  
7.258  
7.240  
7.226  
7.215  
7.204  
7.123  
7.112

4.806  
4.326  
4.316  
4.306  
4.296

2.309

1.561  
1.481  
1.471  
1.461

Current Data Parameters  
NAME AMY-3-102-H.fid  
EXPNO 1  
PROCNO 1  
F2 - Processing parameters  
SI 65536  
SF 699.7441514 MHz  
WDW EM  
SSB 0  
LB 0.30 Hz  
GB 0  
PC 1.00

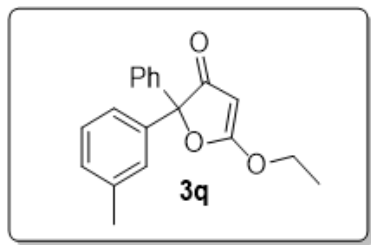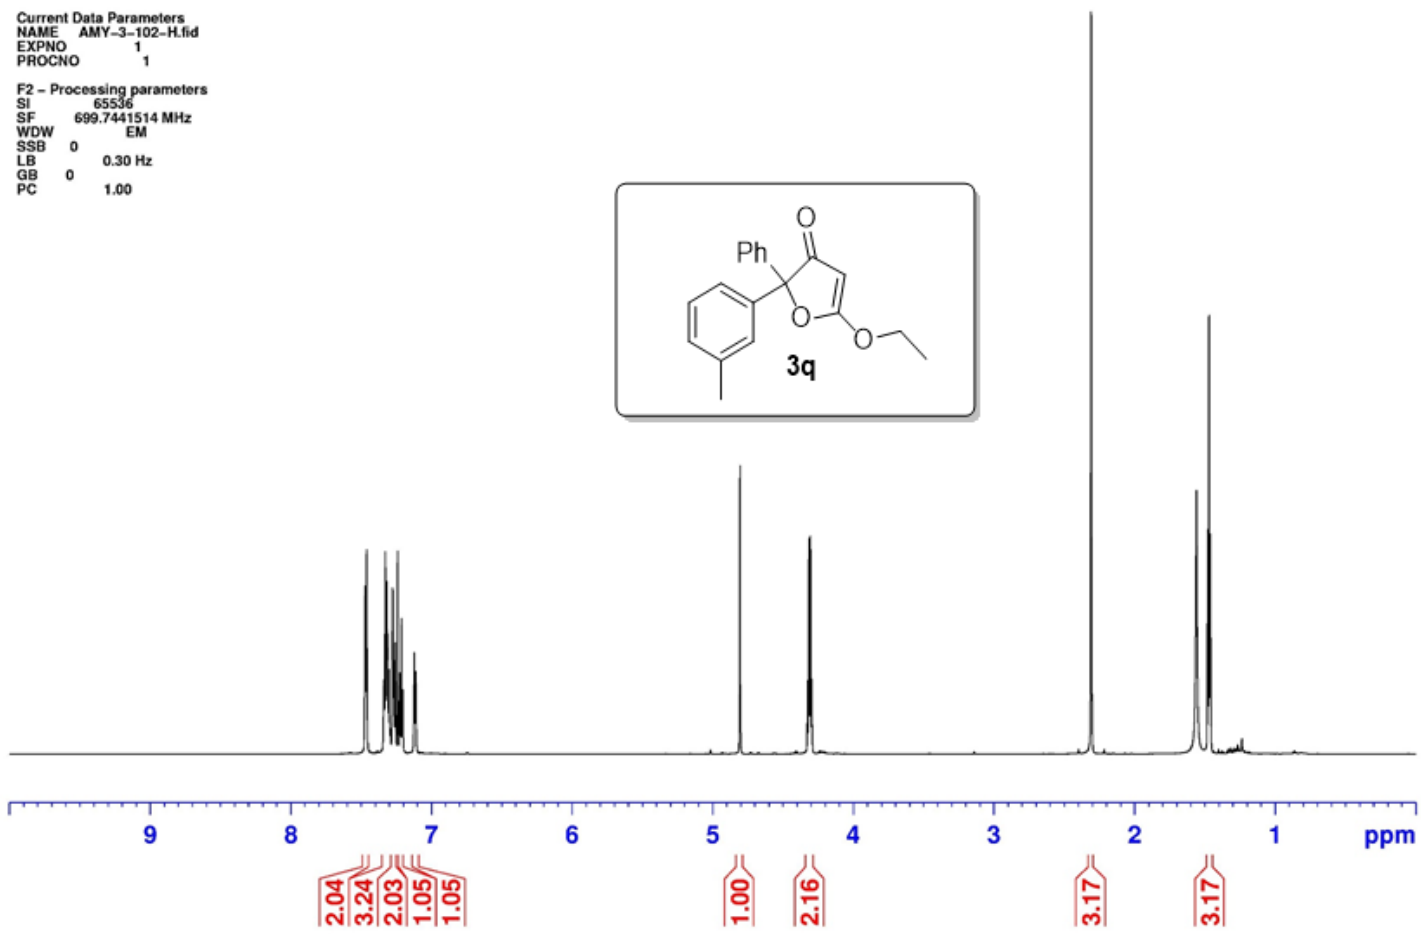

$^{13}\text{C}$  NMR; 175 MHz

Solvent:  $\text{CDCl}_3$

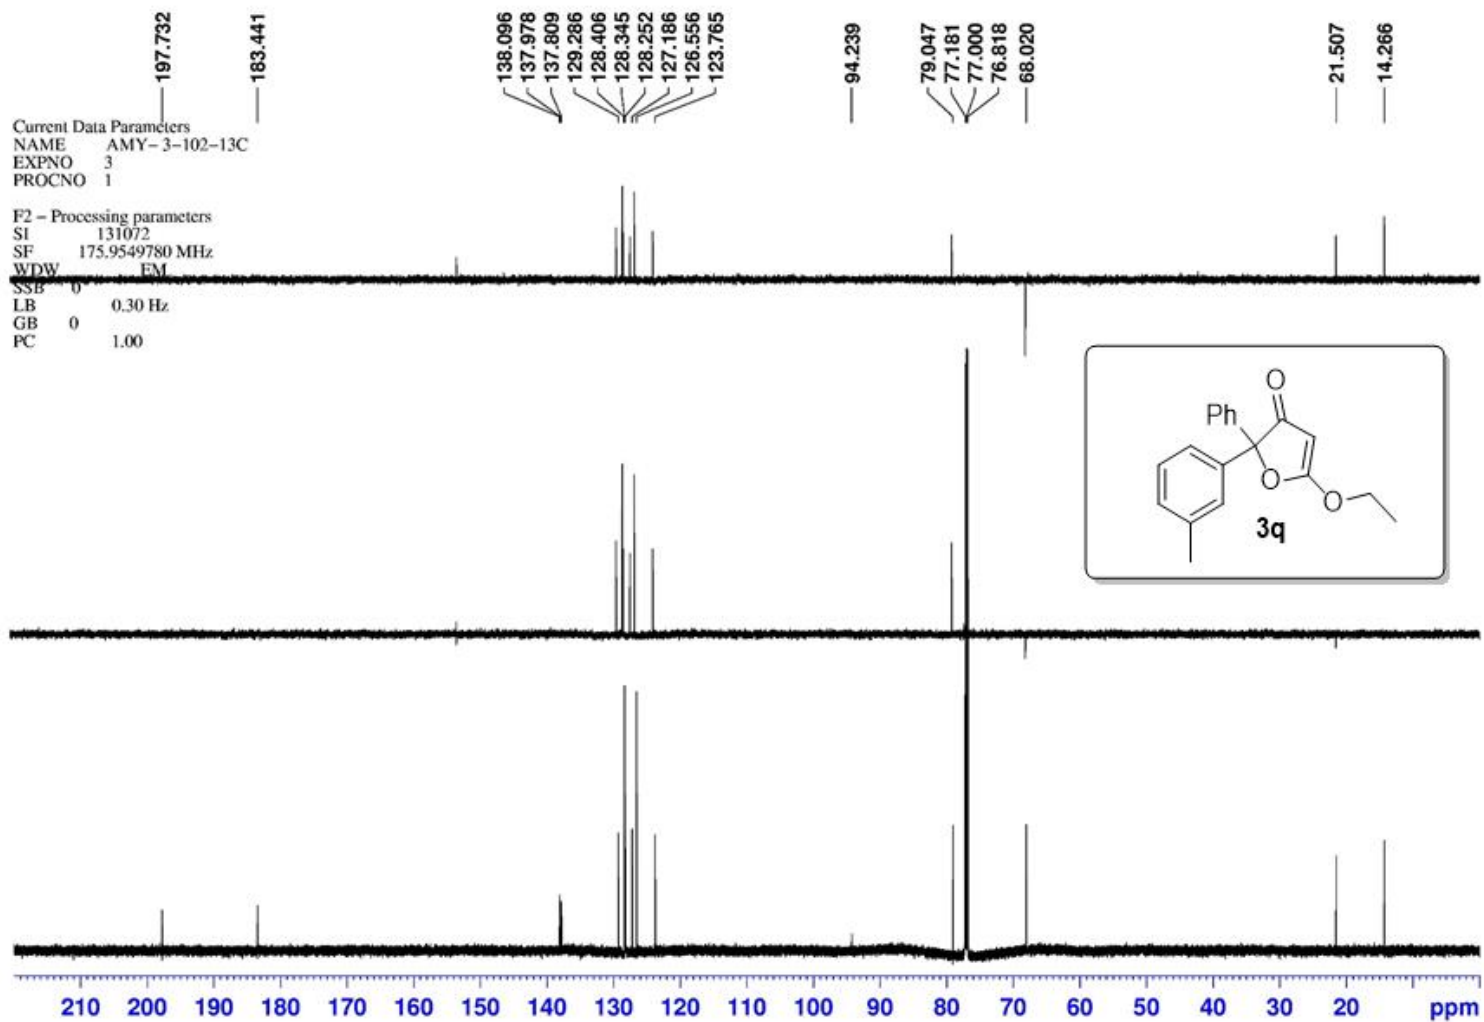



$^1\text{H}$  NMR; 700 MHz  
Solvent:  $\text{CDCl}_3$

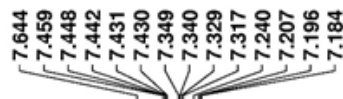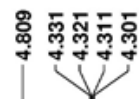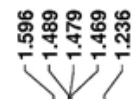

Current Data Parameters  
NAME AMY-3-105-H.fid  
EXPNO 1  
PROCNO 1

F2 - Processing parameters  
SI 65536  
SF 699.7441520 MHz  
WDW EM  
SSB 0  
LB 0.30 Hz  
GB 0  
PC 1.00

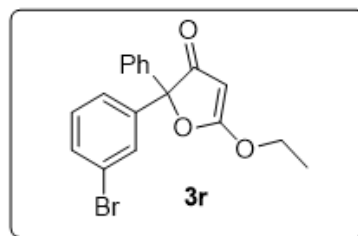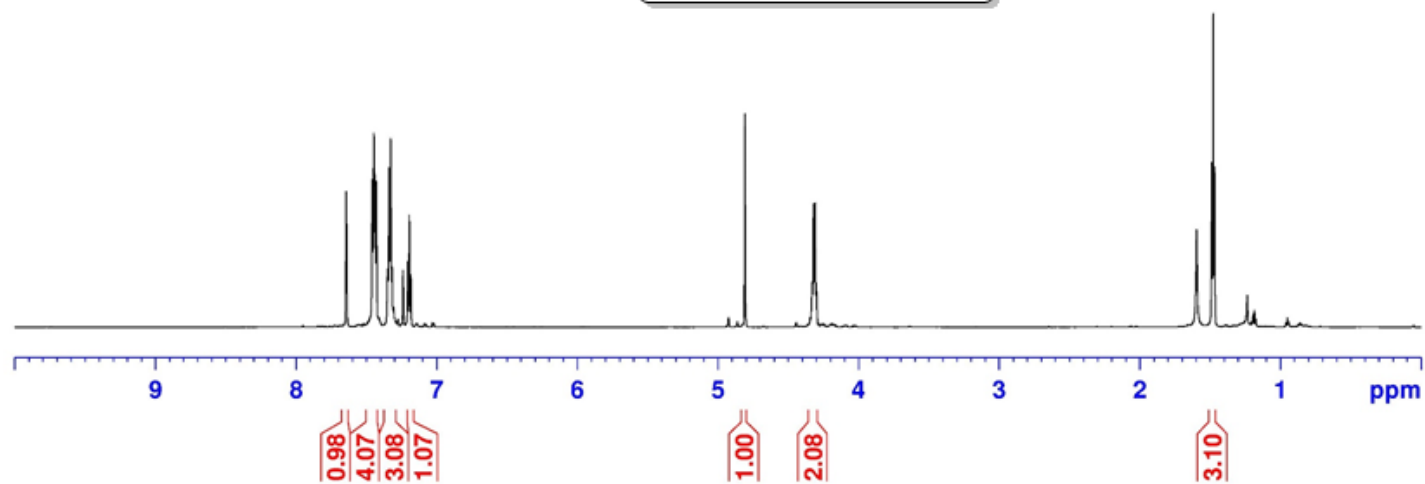

$^{13}\text{C}$  NMR; 175 MHz

Solvent:  $\text{CDCl}_3$

196.884  
183.454

140.056  
137.420  
131.583  
129.913  
129.286  
128.728  
128.526  
126.514  
125.304  
122.516

93.008

78.993  
77.182  
77.000  
76.818  
68.300

14.231

Current Data Parameters  
NAME AMY-3-105-13C  
EXPNO 3  
PROCNO 1

F2 - Processing parameters  
SI 131072  
SF 175.9549801 MHz  
WDW EM  
SSB 0  
LB 0.30 Hz  
GB 0  
PC 1.00

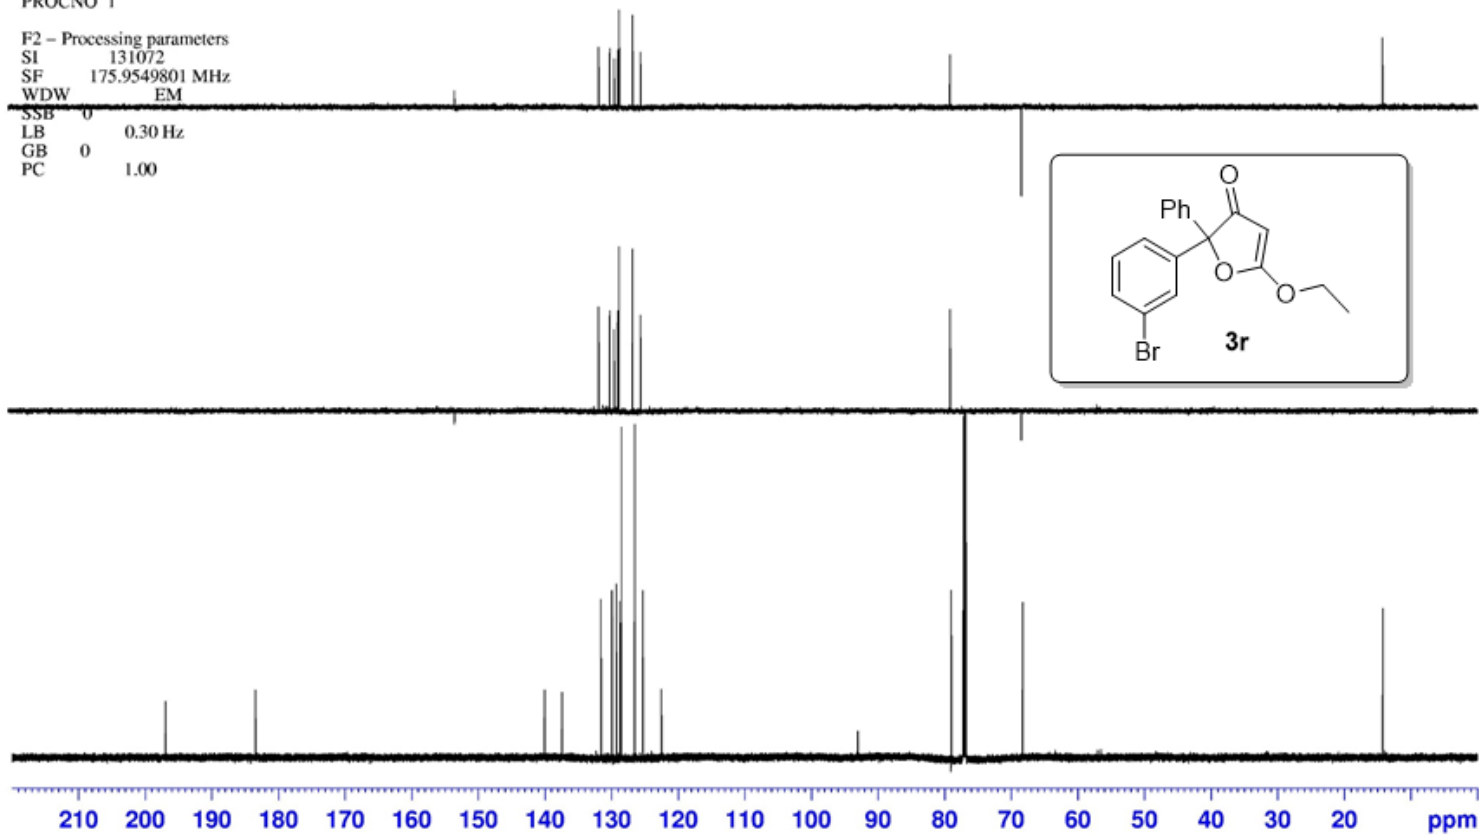

$^1\text{H}$  NMR; 700 MHz

Solvent:  $\text{CDCl}_3$

7.526  
7.516  
7.350  
7.348  
7.341  
7.330  
7.327  
7.324  
7.317  
7.316  
7.307  
7.304  
7.302  
7.299  
7.297  
7.241  
7.034  
7.021  
6.891  
6.879  
6.855  
6.844  
6.833

4.795  
4.298  
4.288  
4.278  
4.268  
3.641

1.572  
1.465  
1.455  
1.445

Current Data Parameters  
NAME AMY-3-85-H.fid  
EXPNO 1  
PROCNO 1

F2 - Processing parameters  
SI 65536  
SF 699.7431023 MHz  
WDW EM  
SSB 0  
LB 0.30 Hz  
GB 0  
PC 1.00

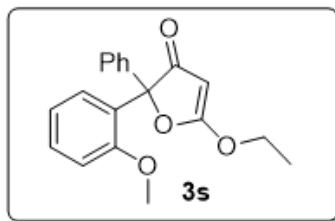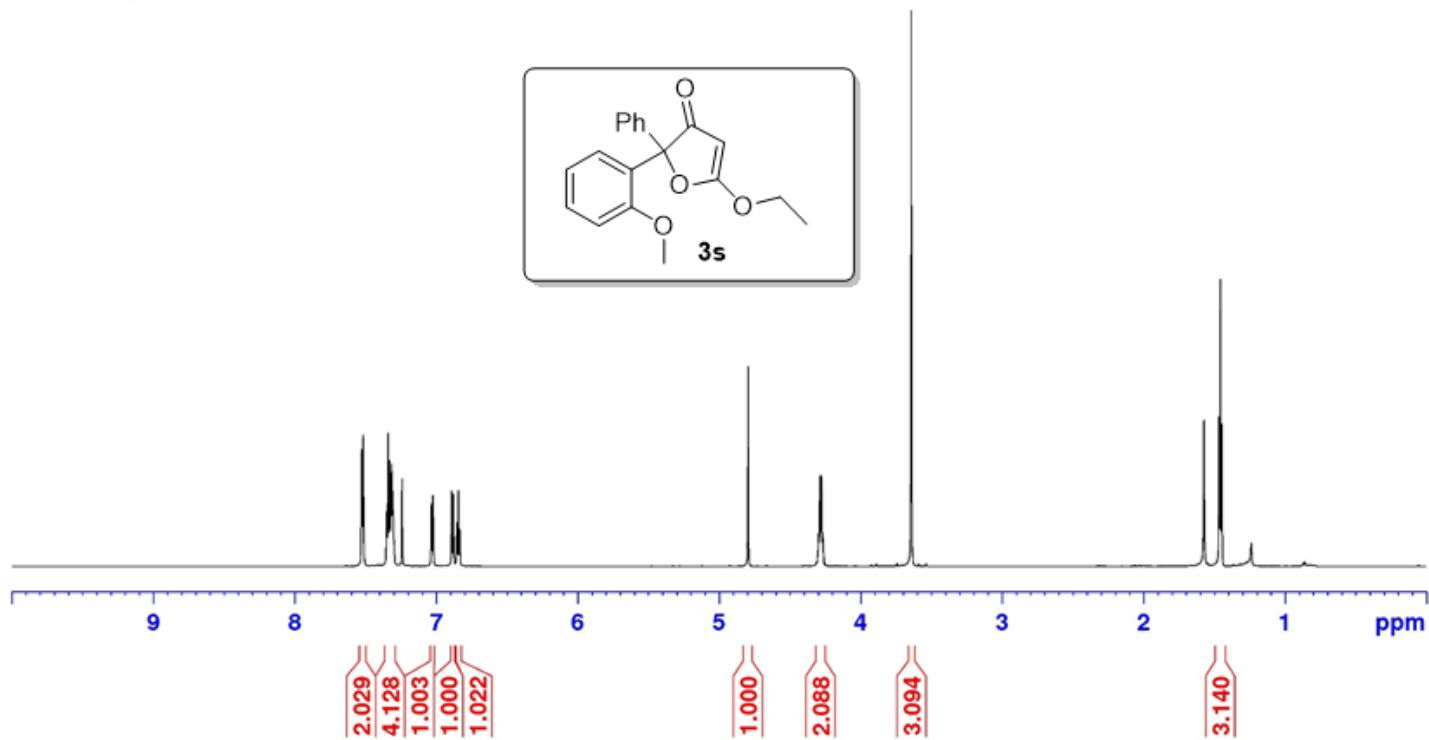

$^{13}\text{C}$  NMR; 175 MHz

Solvent:  $\text{CDCl}_3$

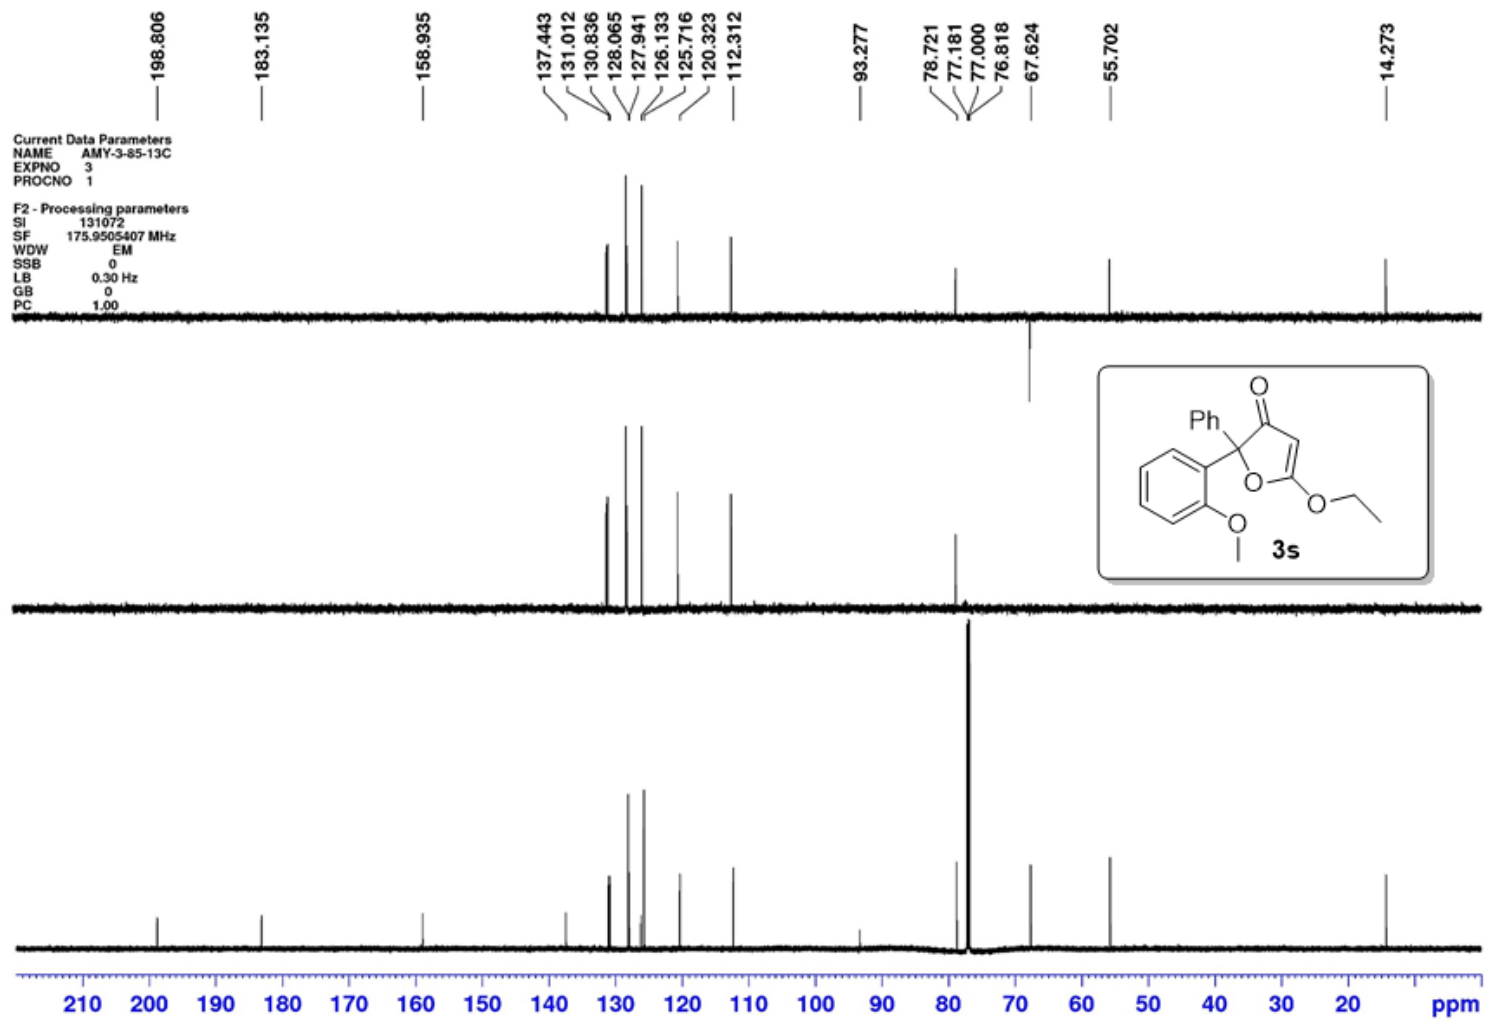

$^1\text{H}$  NMR; 700 MHz  
Solvent:  $\text{CDCl}_3$

7.539  
7.537  
7.527  
7.340  
7.330  
7.318  
7.284  
7.274  
7.240

4.689  
4.311  
4.307  
4.297  
4.289  
4.287  
4.279  
4.269  
4.265  
2.119  
2.104  
2.103  
2.098  
2.089  
2.081  
2.074  
2.064  
2.058  
2.054  
2.044  
2.037  
1.557  
1.489  
1.479  
1.469  
1.315  
1.311  
1.308  
1.300  
1.290  
1.285  
1.281

Current Data Parameters  
NAME AMY-3-96-H.fid  
EXPNO 1  
PROCNO 1  
F2 - Processing parameters  
SI 65536  
SF 699.7438011 MHz  
WDW EM  
SSB 0  
LB 0.30 Hz  
GB 0  
PC 1.00

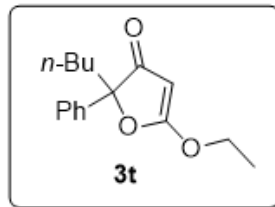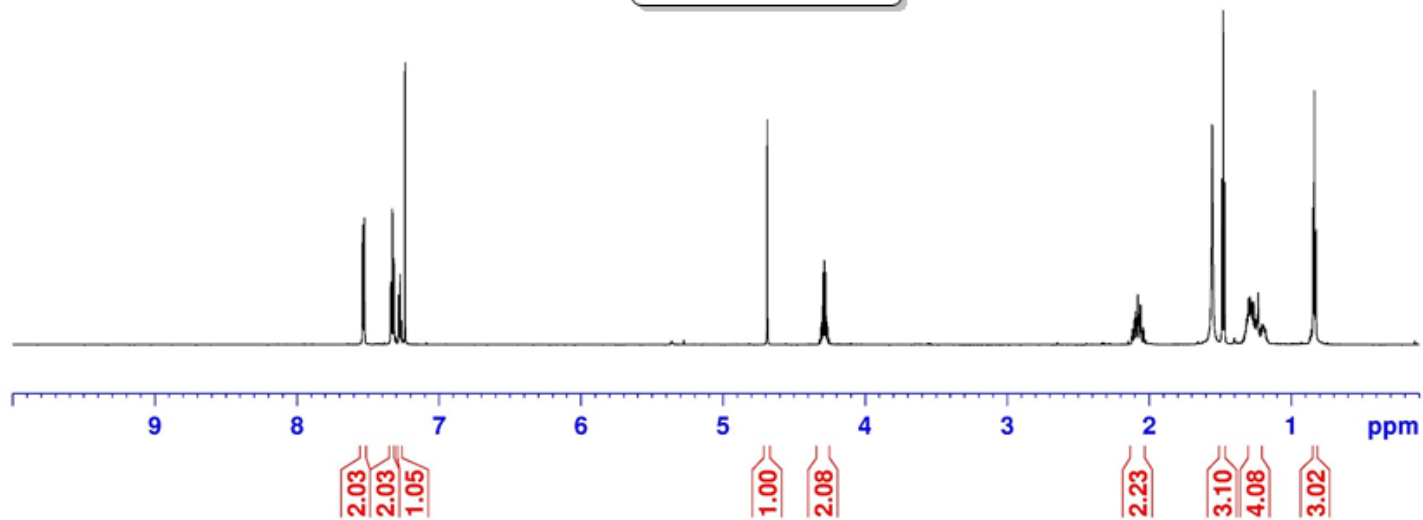

$^{13}\text{C}$  NMR; 175 MHz

Solvent:  $\text{CDCl}_3$

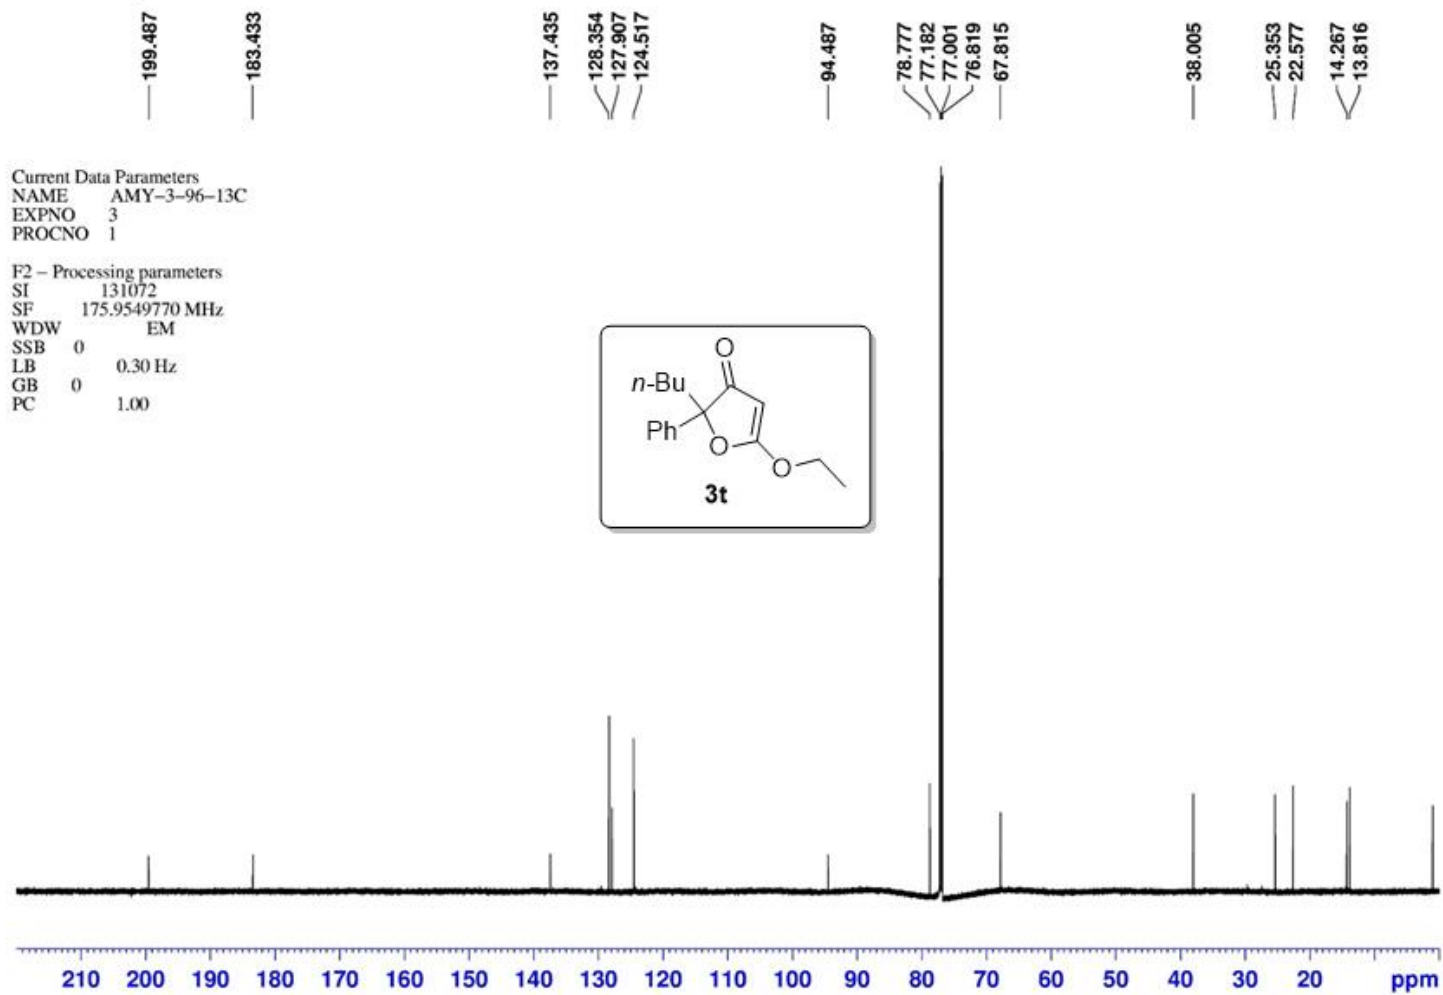

$^1\text{H}$  NMR: 700 MHz  
Solvent:  $\text{CDCl}_3$

7.539  
7.527  
7.342  
7.332  
7.320  
7.287  
7.277  
7.267  
7.240

4.700  
4.308  
4.305  
4.302  
4.298  
4.295  
4.288  
4.285  
4.278  
4.274

2.149  
2.138  
2.128  
2.117  
1.548  
1.490  
1.479  
1.469  
1.234  
0.890  
0.879  
0.869

Current Data Parameters  
NAME AMY-3-94-H.fid  
EXPNO 1  
PROCNO 1  
F2 - Processing parameters  
SI 65536  
SF 699.7441511 MHz  
WDW EM  
SSB 0  
LB 0.30 Hz  
GB 0  
PC 1.00

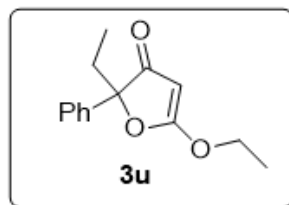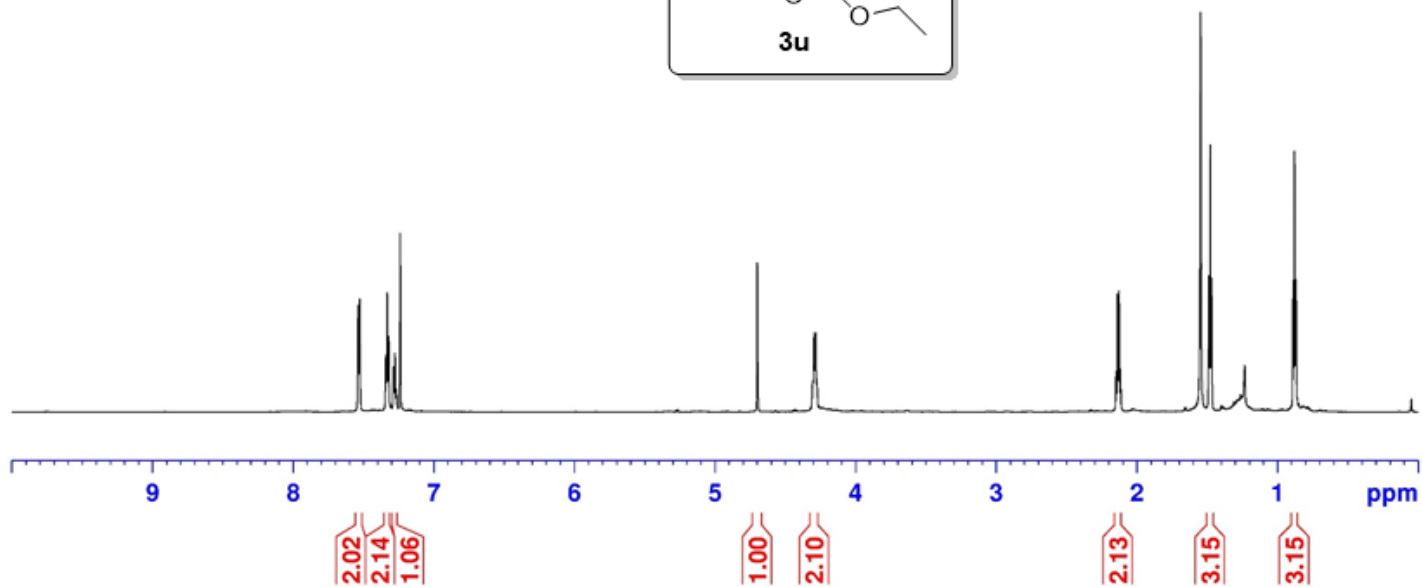

$^{13}\text{C}$  NMR; 175 MHz

Solvent:  $\text{CDCl}_3$

199.371

183.522

137.225

128.357

127.946

124.597

94.746

78.971

77.182

77.000

76.819

67.803

31.373

14.268

7.733

Current Data Parameters  
NAME AMY-3-94-13C  
EXPNO 3  
PROCNO 1

F2 - Processing parameters  
SI 131072  
SF 175.9549766 MHz  
WDW EM  
SSB 0  
LB 0.30 Hz  
GB 0  
PC 1.00

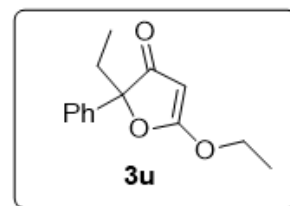

210 200 190 180 170 160 150 140 130 120 110 100 90 80 70 60 50 40 30 20 ppm



$^1\text{H}$  NMR; 700 MHz  
Solvent:  $\text{CDCl}_3$

7.517  
7.515  
7.505  
7.438  
7.427  
7.419  
7.416  
7.407  
7.369  
7.360  
7.348  
7.339  
7.329  
7.319  
7.240  
7.225  
7.213  
6.888  
6.876

4.632

3.788

1.634

Current Data Parameters  
NAME AMY-3-109-H.fid  
EXPNO 1  
PROCNO 1

F2 - Processing parameters  
SI 65536  
SF 699.7441515 MHz  
WDW EM  
SSB 0  
LB 0.30 Hz  
GB 0  
PC 1.00

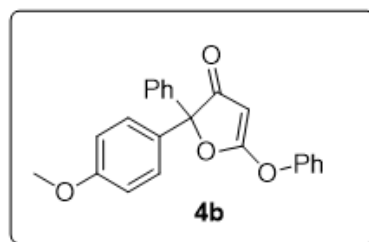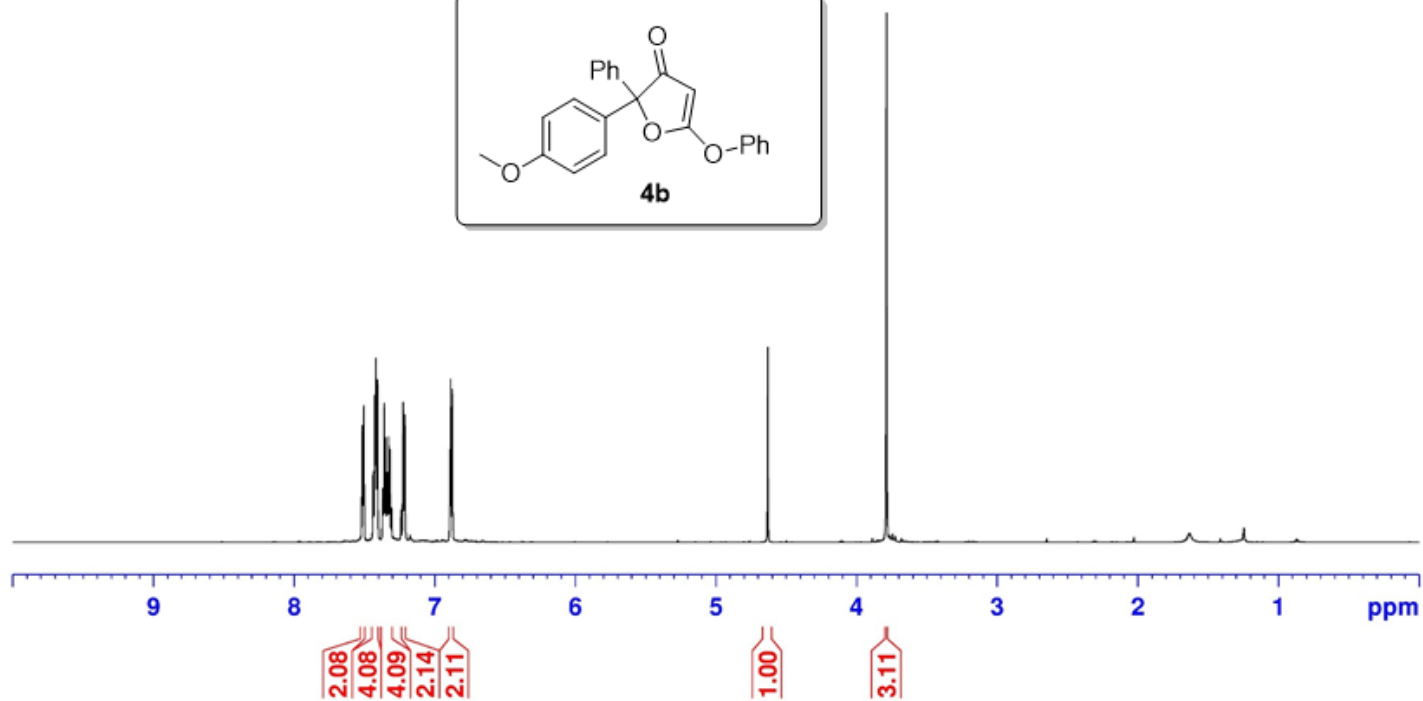

$^{13}\text{C}$  NMR; 175 MHz

Solvent:  $\text{CDCl}_3$

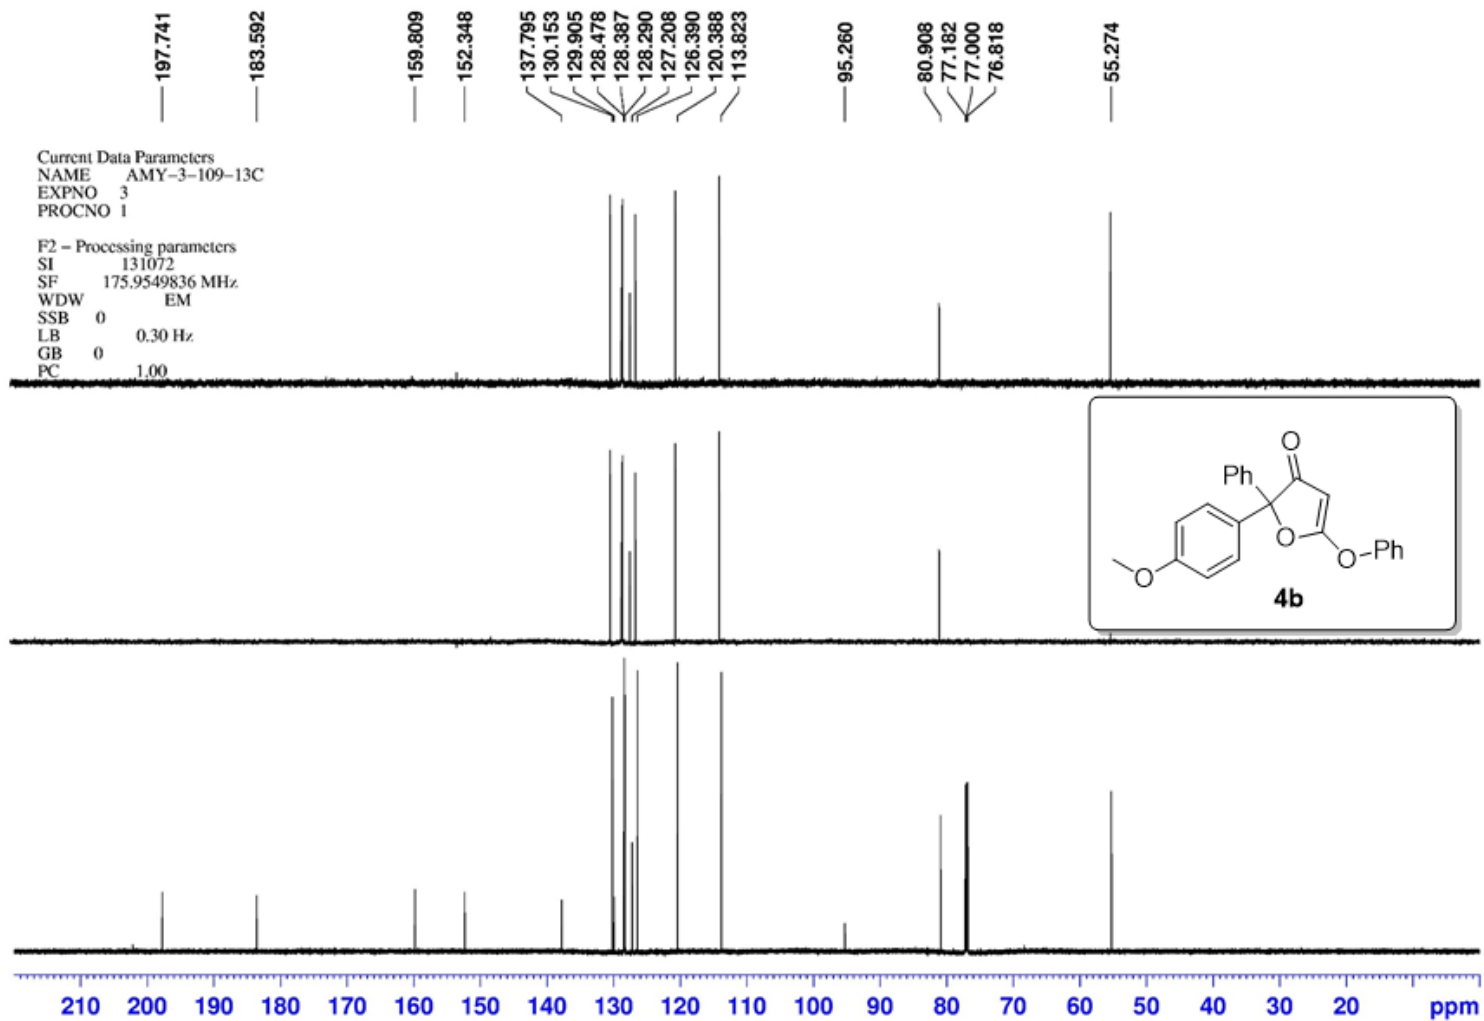

$^1\text{H}$  NMR; 500 MHz  
Solvent:  $\text{CDCl}_3$

7.458  
7.454  
7.442  
7.364  
7.347  
7.340  
7.328  
7.313  
7.302  
7.240  
6.858  
6.840  
6.024  
6.013  
6.002  
5.991  
5.979  
5.968  
5.957  
5.946  
5.469  
5.434  
5.399  
5.378  
4.826  
4.746  
4.735  
3.771

Current Data Parameters  
NAME AMY-3-167-1H.fid  
EXPNO 1  
PROCNO 1  
F2 - Processing parameters  
SI 32768  
SF 499.727654 MHz  
WDW EM  
SSB 0  
LB 0.30 Hz  
GB 0  
PC 1.00

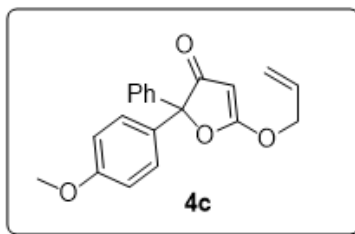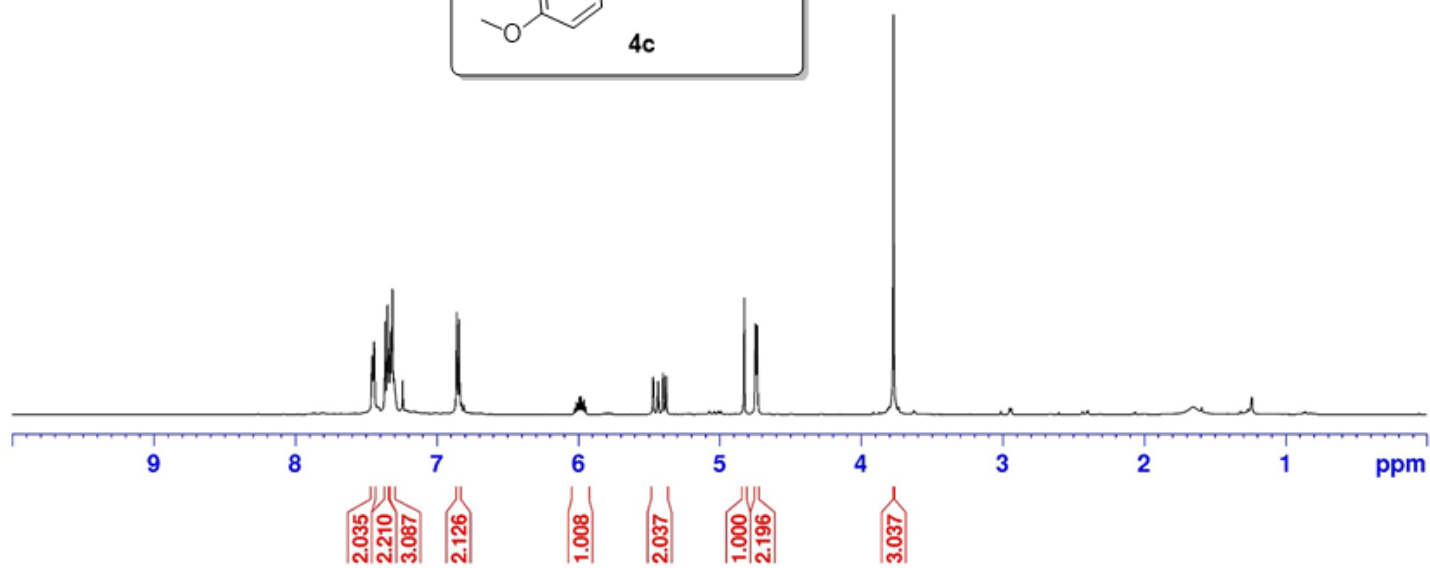

$^{13}\text{C}$  NMR; 125 MHz  
Solvent:  $\text{CDCl}_3$

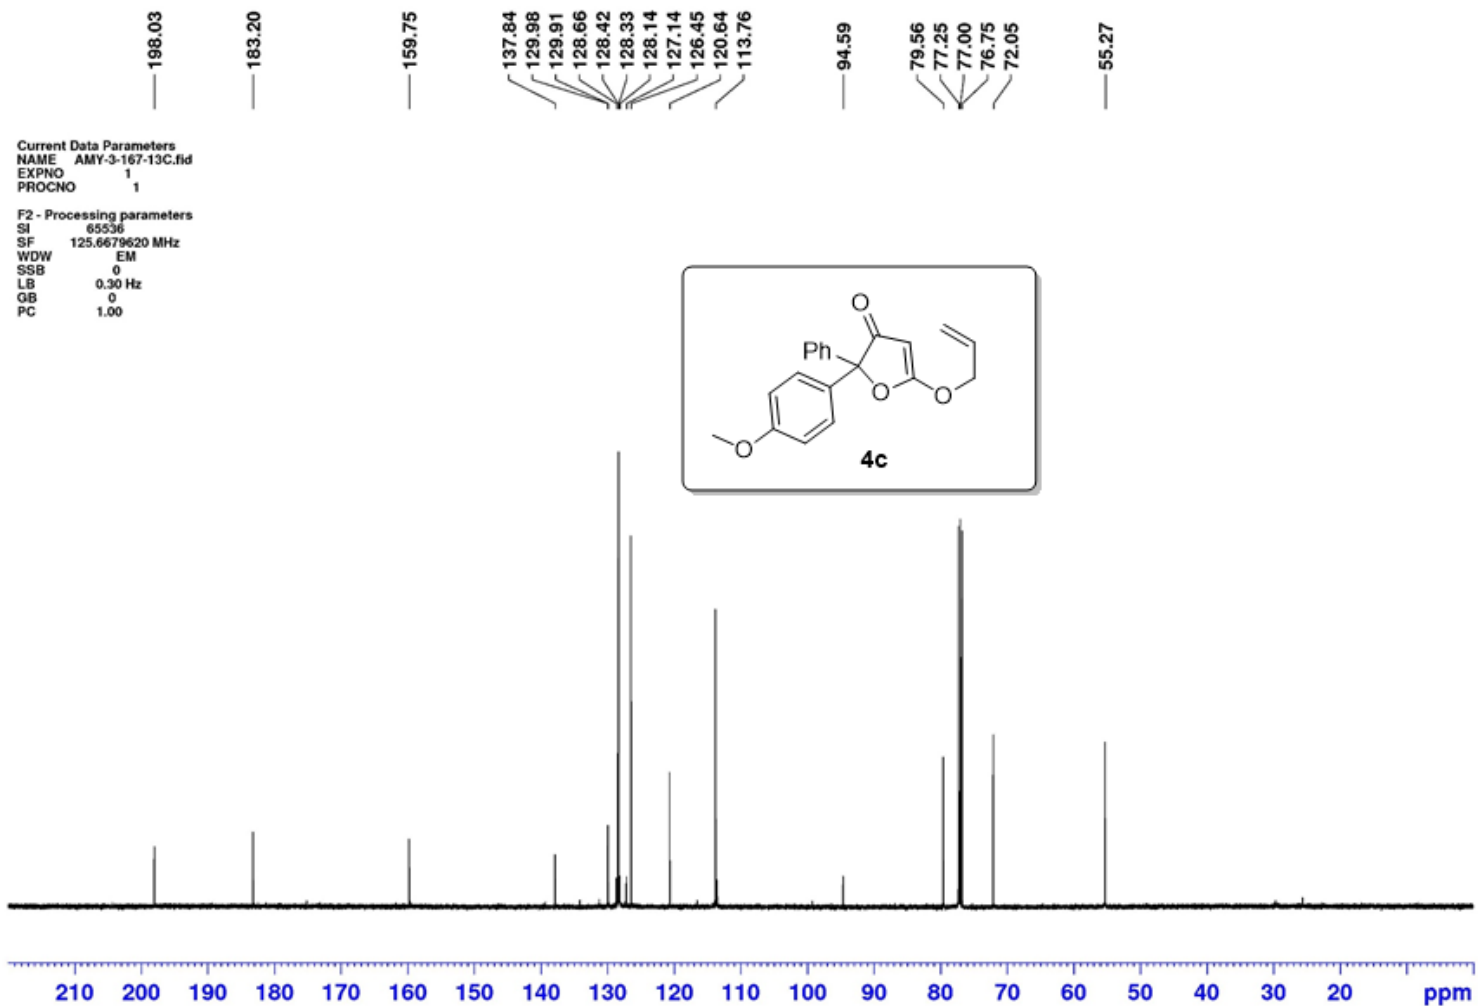

$^1\text{H}$  NMR; 500 MHz  
Solvent:  $\text{CDCl}_3$

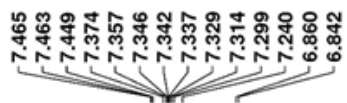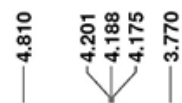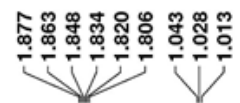

Current Data Parameters  
NAME AMY-3-198-1H.fid  
EXPNO 1  
PROCNO 1  
F2 - Processing parameters  
SI 32768  
SF 499.727648 MHz  
WDW EM  
SSB 0  
LB 0.30 Hz  
GB 0  
PC 1.00

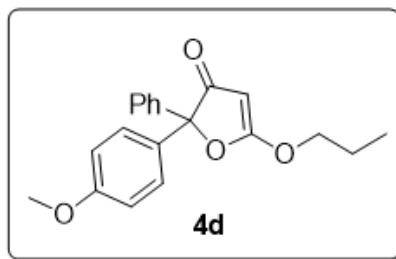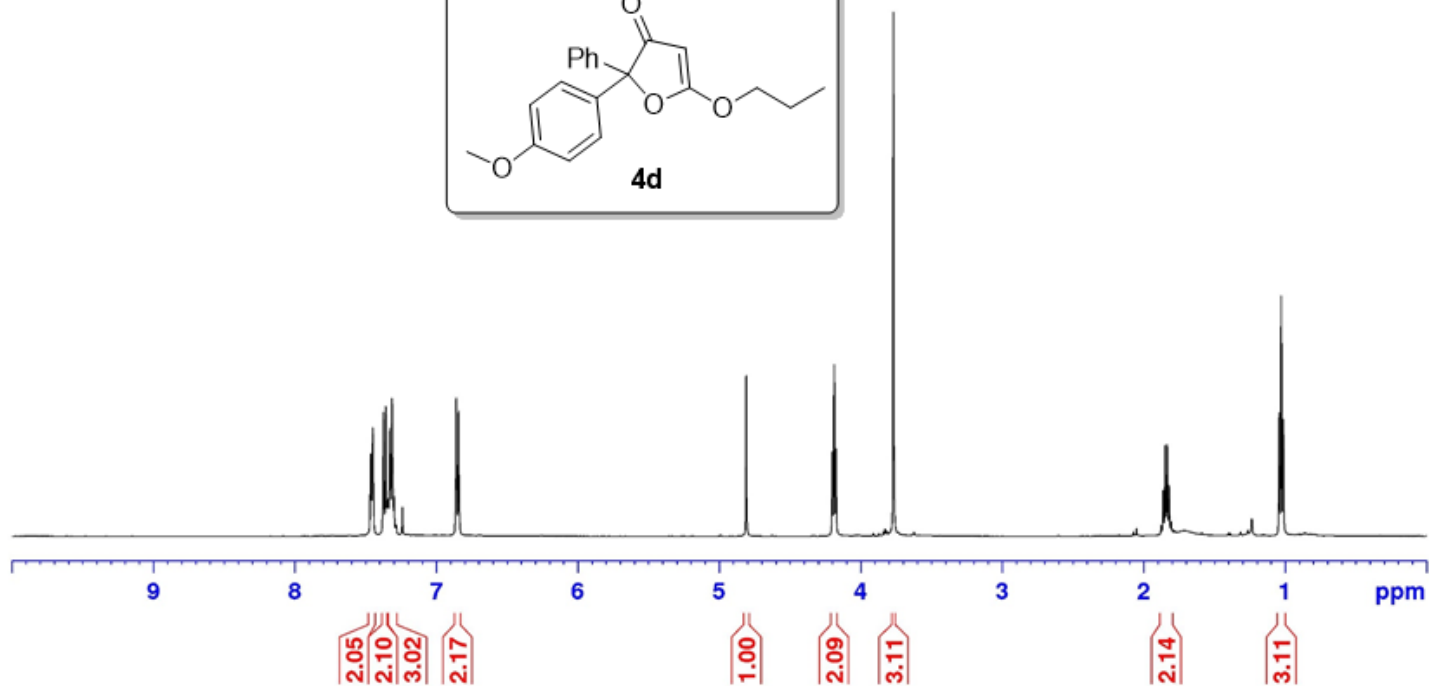

$^{13}\text{C}$  NMR; 125 MHz  
Solvent:  $\text{CDCl}_3$

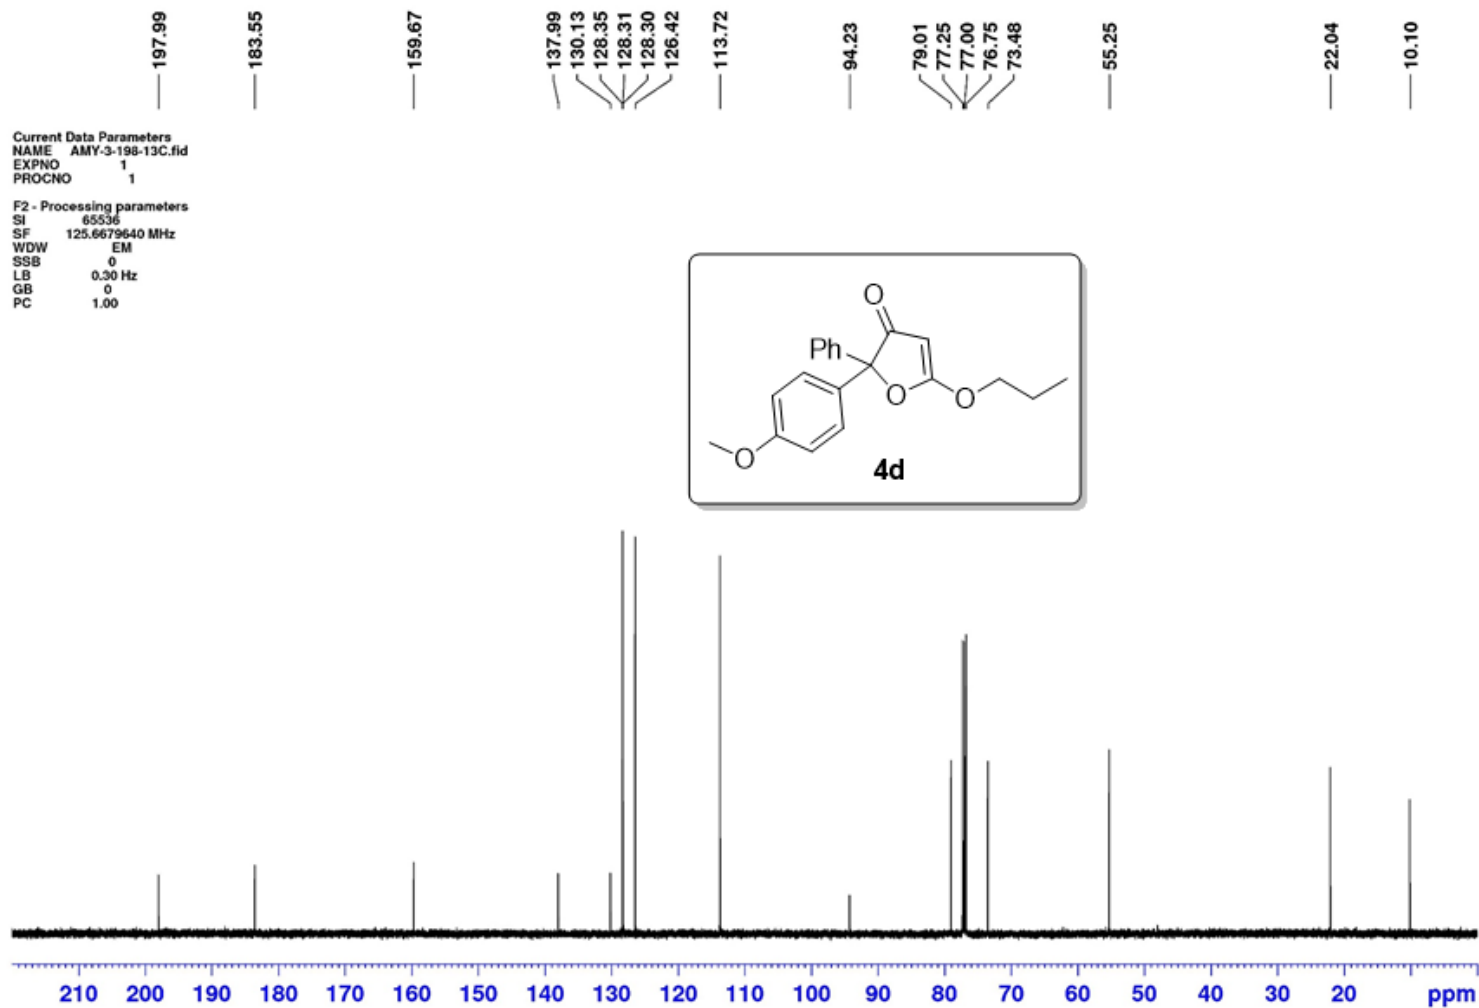

$^1\text{H}$  NMR; 700 MHz  
Solvent:  $\text{CDCl}_3$

7.463  
7.452  
7.373  
7.361  
7.336  
7.332  
7.327  
7.315  
7.309  
7.307  
7.298  
7.294  
7.288  
7.240  
6.857  
6.845

4.807  
4.239  
4.230  
4.220  
3.770

1.811  
1.801  
1.791  
1.780  
1.771  
1.699  
1.493  
1.482  
1.472  
1.461  
1.450  
1.440  
0.969  
0.958  
0.948

Current Data Parameters  
NAME AMY-3-191-H.fid  
EXPNO 1  
PROCNO 1  
F2 - Processing parameters  
SI 65536  
SF 699.7441496 MHz  
WDW EM  
SSB 0  
LB 0.30 Hz  
GB 0  
PC 1.00

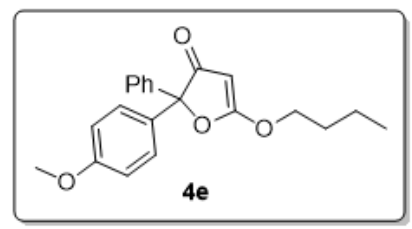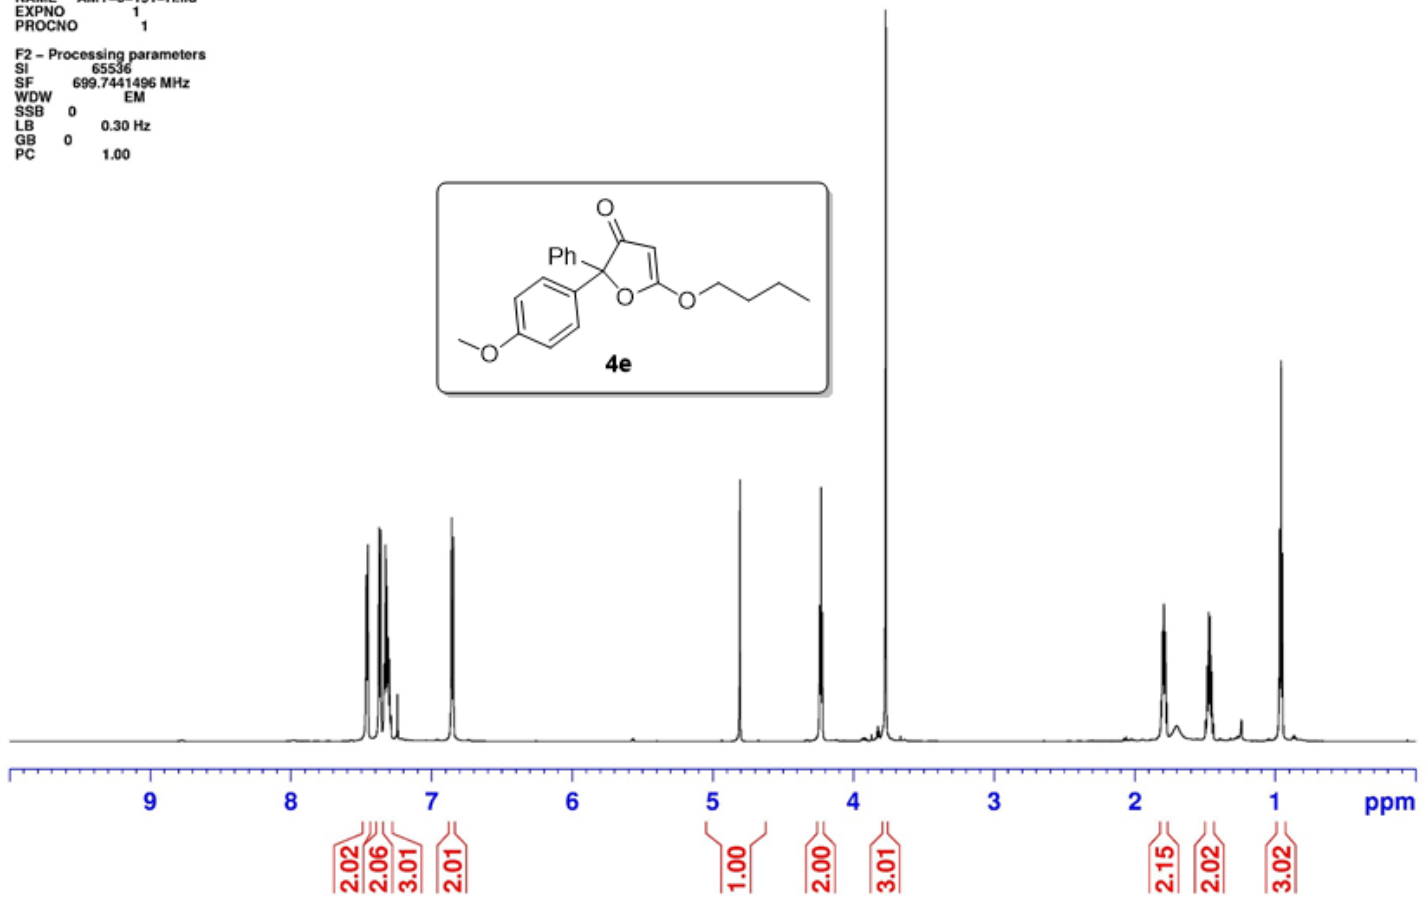

$^{13}\text{C}$  NMR; 175 MHz  
Solvent:  $\text{CDCl}_3$

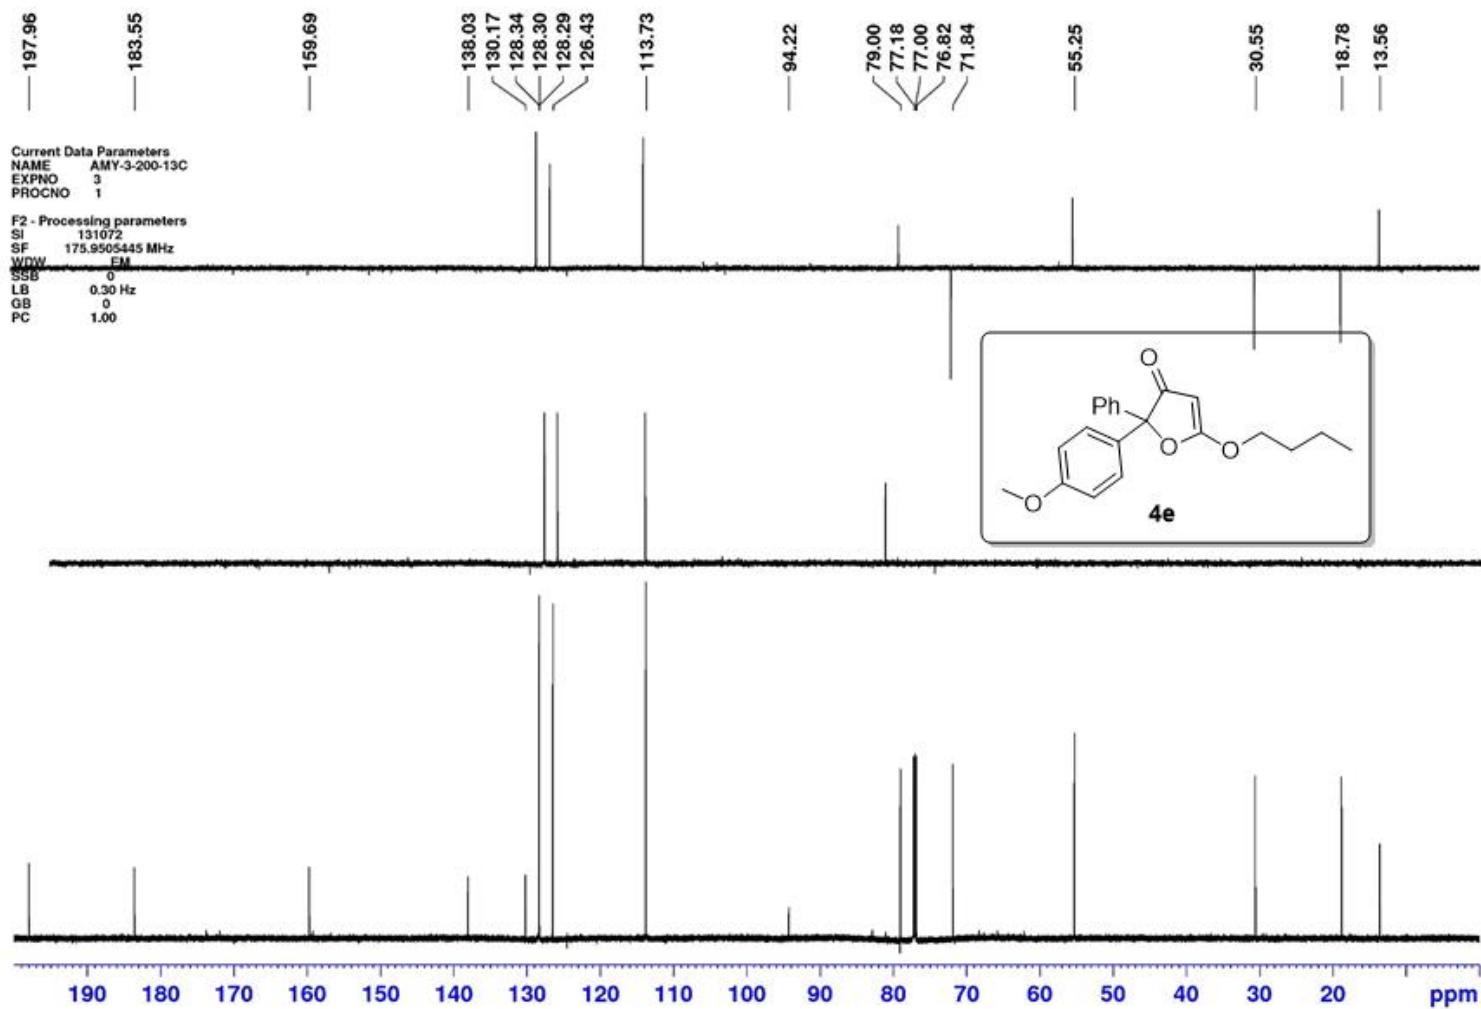



$^1\text{H}$  NMR; 500 MHz  
Solvent:  $\text{CDCl}_3$

7.461  
7.447  
7.375  
7.357  
7.345  
7.342  
7.337  
7.329  
7.313  
7.297  
7.284  
7.240  
6.860  
6.843  
6.826

4.789  
4.515  
4.507  
4.498  
4.490  
4.482  
4.472  
4.465  
3.769

1.999  
1.982  
1.977  
1.804  
1.787  
1.682  
1.663  
1.644  
1.626  
1.619  
1.564  
1.558  
1.546  
1.535  
1.411  
1.391  
1.369  
1.347  
1.328

Current Data Parameters  
NAME AMY-3-196-1H.fid  
EXPNO 1  
PROCNO 1  
  
F2 - Processing parameters  
SI 32768  
SF 499.727648 MHz  
WDW EM  
SSB 0  
LB 0.30 Hz  
GB 0  
PC 1.00

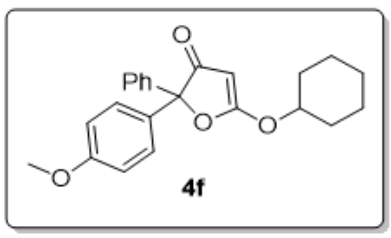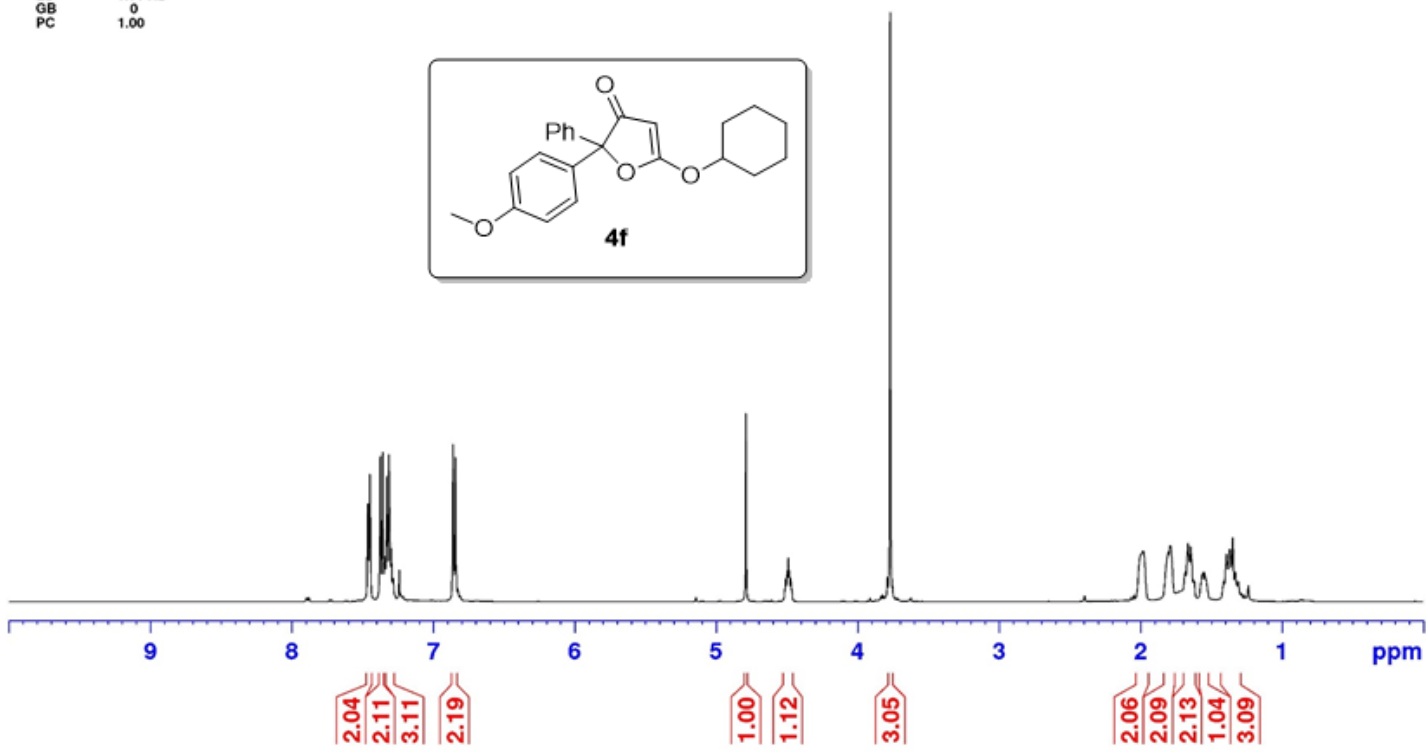

$^{13}\text{C}$  NMR; 125 MHz  
Solvent:  $\text{CDCl}_3$

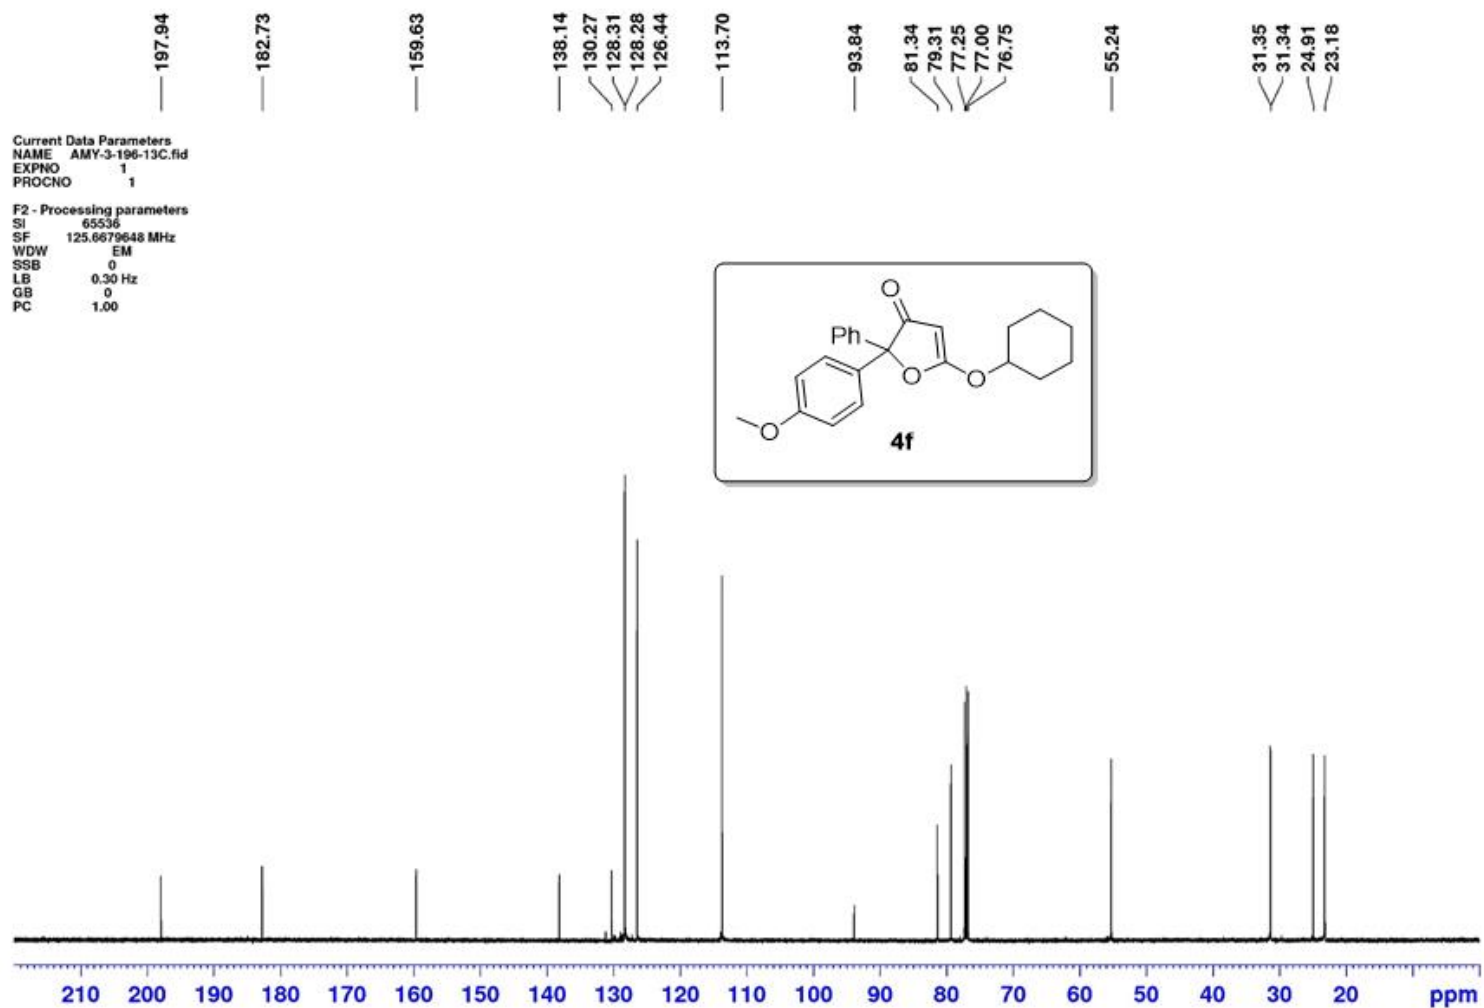

$^1\text{H}$  NMR; 500 MHz  
Solvent:  $\text{CDCl}_3$

7.431  
7.426  
7.416  
7.413  
7.397  
7.380  
7.348  
7.330  
7.318  
7.314  
7.308  
7.304  
7.240  
6.853  
6.835

5.269

4.903

3.772

1.673

Current Data Parameters  
NAME AMY-3-200-1H.fid  
EXPNO 1  
PROCNO 1

F2 - Processing parameters  
SI 32768  
SF 499.727651 MHz  
WDW EM  
SSB 0  
LB 0.30 Hz  
GB 0  
PC 1.00

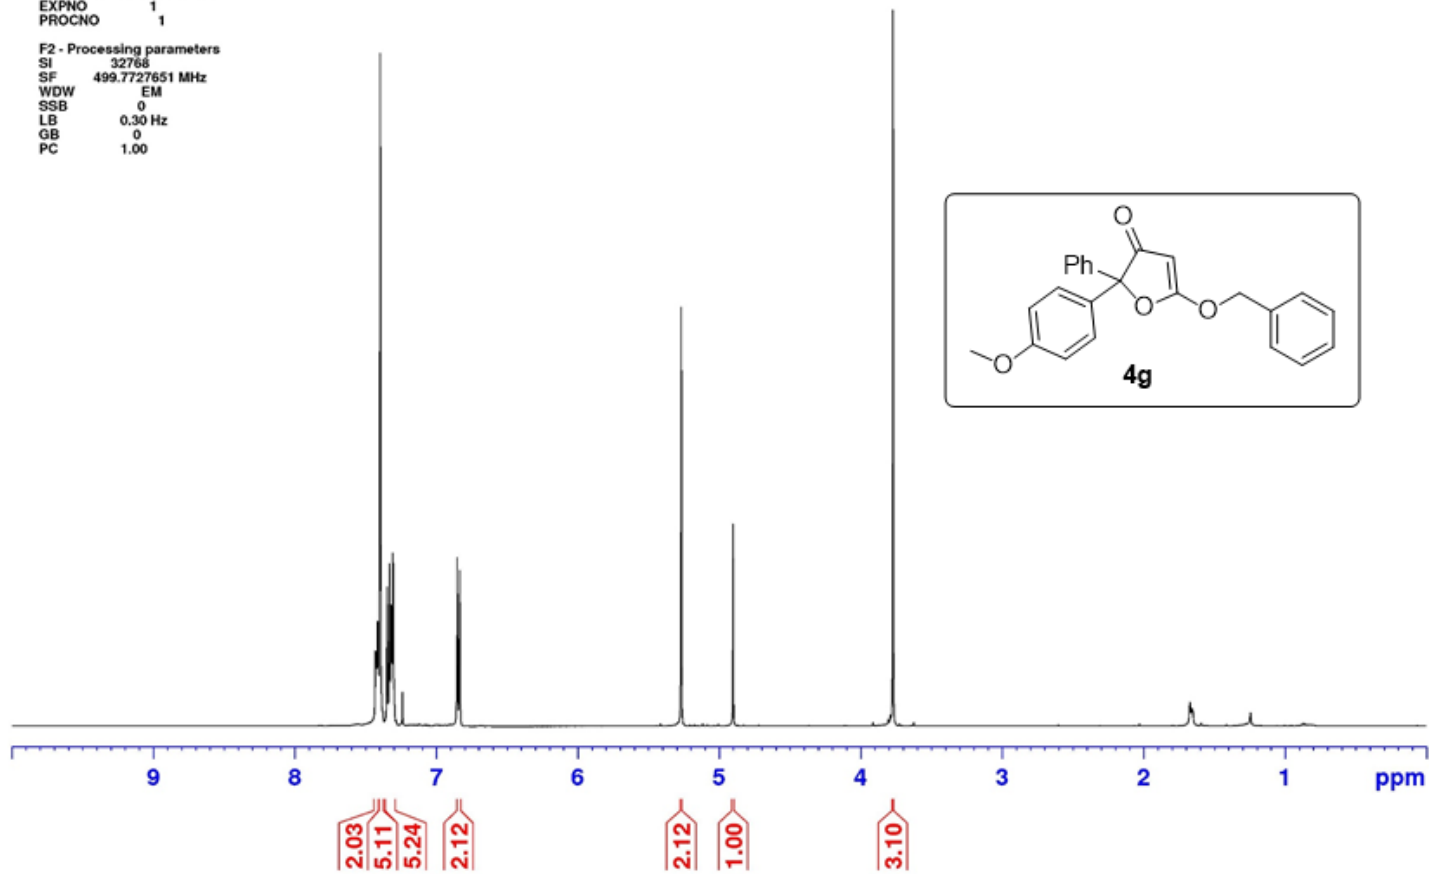

$^{13}\text{C}$  NMR; 125 MHz

Solvent:  $\text{CDCl}_3$

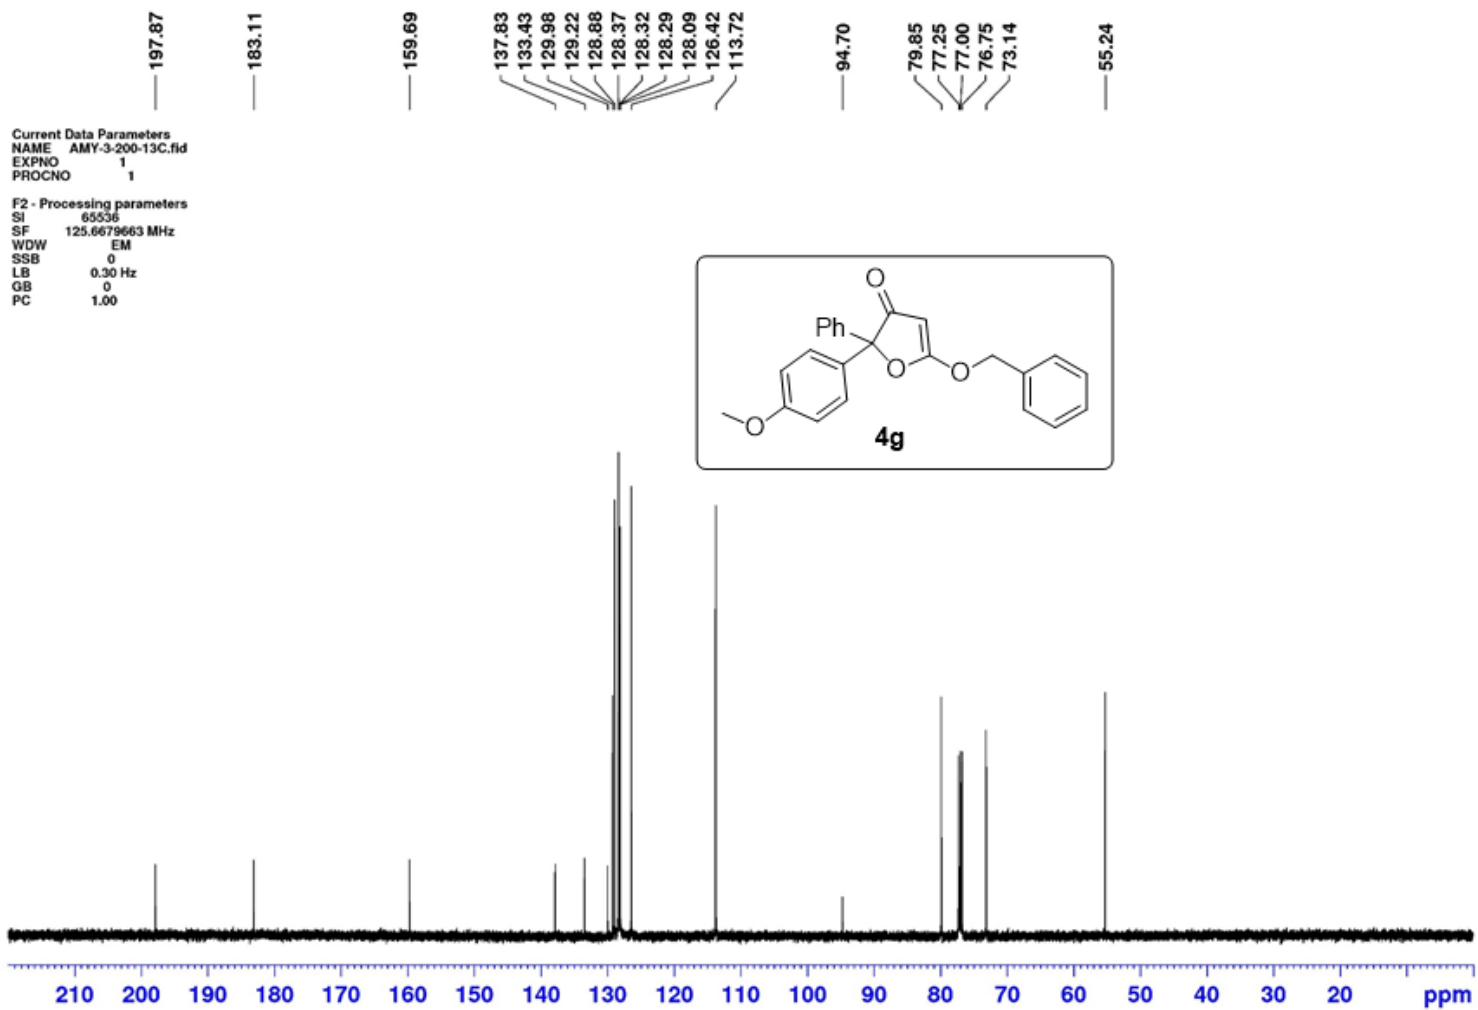

$^1\text{H}$  NMR, 700 MHz  
Solvent:  $\text{CDCl}_3$

Current Data Parameters  
NAME AMY-3-53-H.fid  
EXPNO 3  
PROCNO 1  
F2 - Processing parameters  
SI 65536  
SF 699.7431028 MHz  
WDW EM  
SSB 0  
LB 0.30 Hz  
GB 0  
PC 1.00

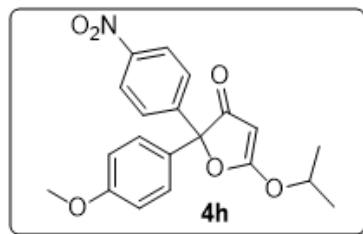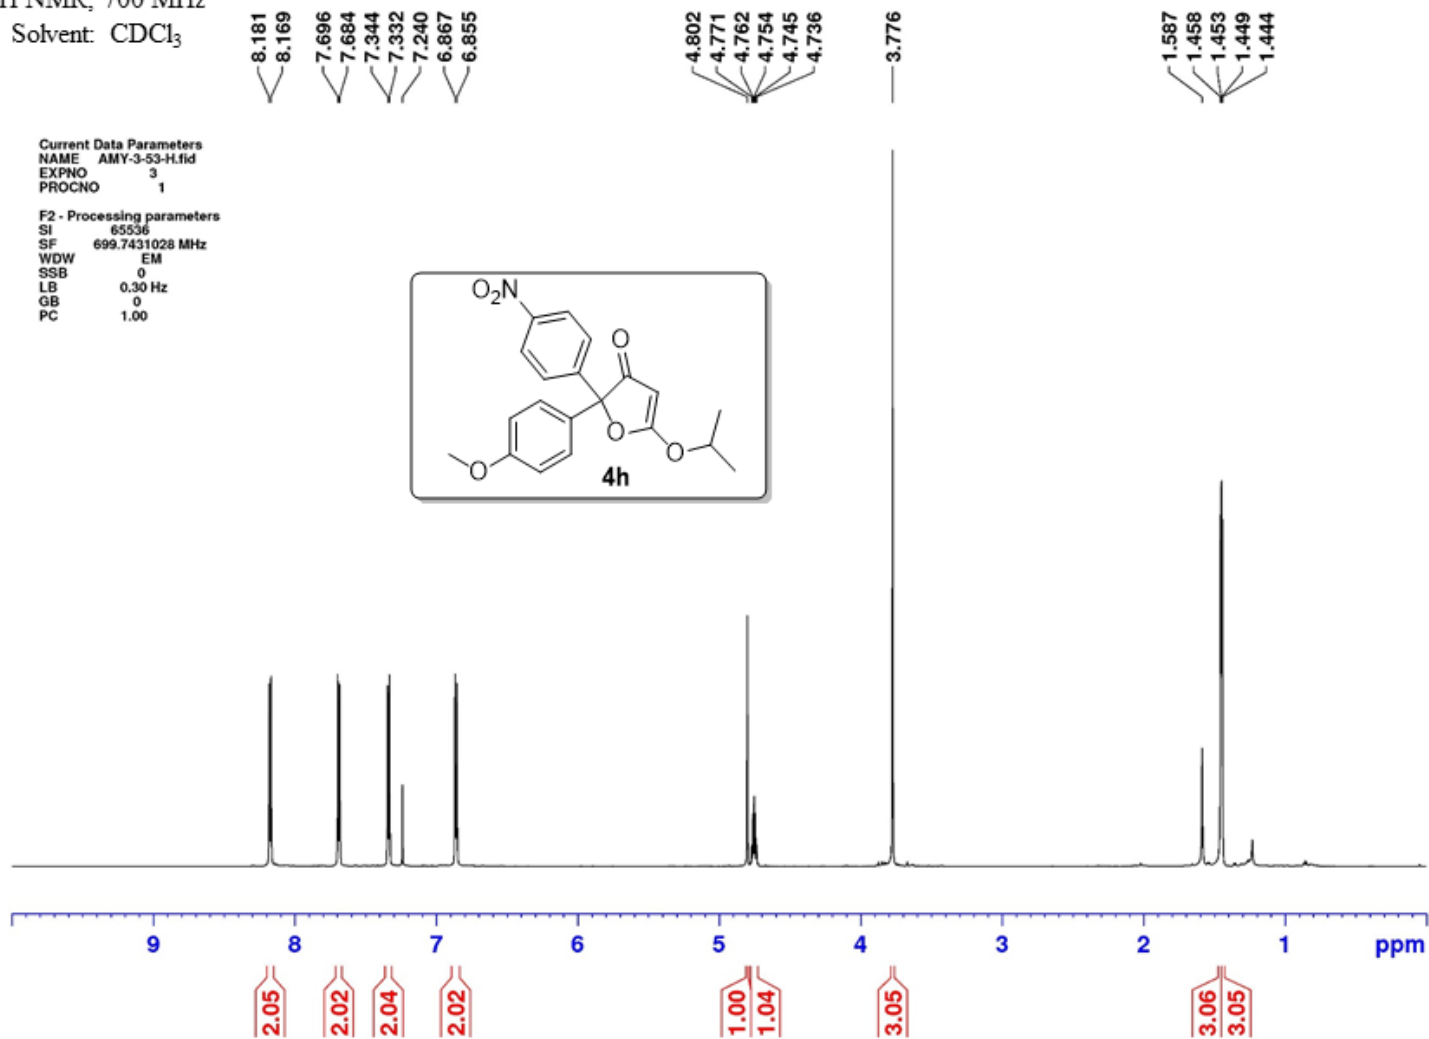

$^{13}\text{C}$  NMR; 175 MHz  
Solvent:  $\text{CDCl}_3$

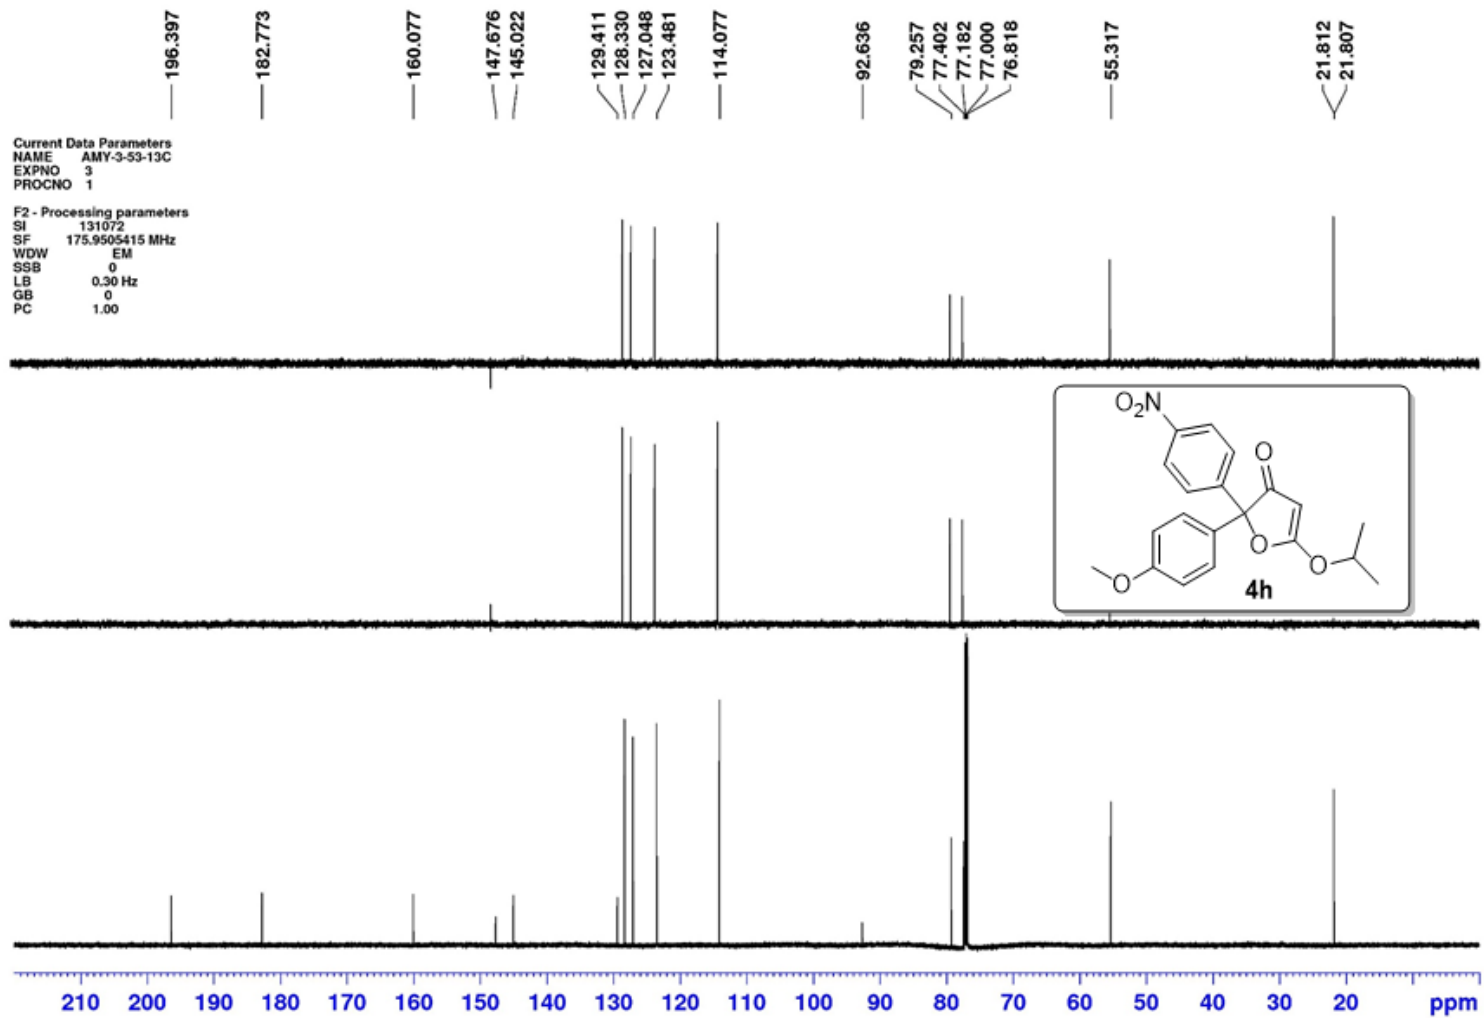

$^1\text{H}$  NMR; 400 MHz

Solvent:  $\text{CDCl}_3$

7.953  
7.952  
7.934  
7.929  
7.572  
7.555  
7.553  
7.523  
7.518  
7.513  
7.503  
7.486  
7.482  
7.441  
7.435  
7.429  
7.417  
7.413  
7.362  
7.355  
7.349  
7.340  
7.335  
7.331  
7.322  
7.320  
7.314  
7.310  
7.302  
7.240  
6.877  
6.873  
6.860  
6.856  
6.079  
3.772

DB-02-02

Current Data Parameters  
NAME DB-02-02  
EXPNO 3  
PROCNO 1

F2 - Acquisition Parameters  
Date\_ 20211008  
Time 10.31  
INSTRUM spect  
PROBHD 5 mm DUL 13C-1  
PULPROG zg30  
TD 32768  
SOLVENT  $\text{CDCl}_3$   
NS 18  
DS 0  
SWH 6410.256 Hz  
FIDRES 0.195625 Hz  
AQ 2.5559039 sec  
RG 228  
DW 78.000 usec  
DE 6.00 usec  
TE 300.0 K  
D1 2.00000000 sec  
TD 1

===== CHANNEL f1 =====  
NUC1  $^1\text{H}$   
P1 10.00 usec  
PL1 -2.40 dB  
SFO1 400.1528010 MHz

F2 - Processing parameters  
SI 16384  
SF 400.1500166 MHz  
WDW EM  
SSB 0  
LB 0 Hz  
GB 0  
PC 1.00

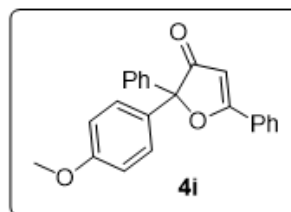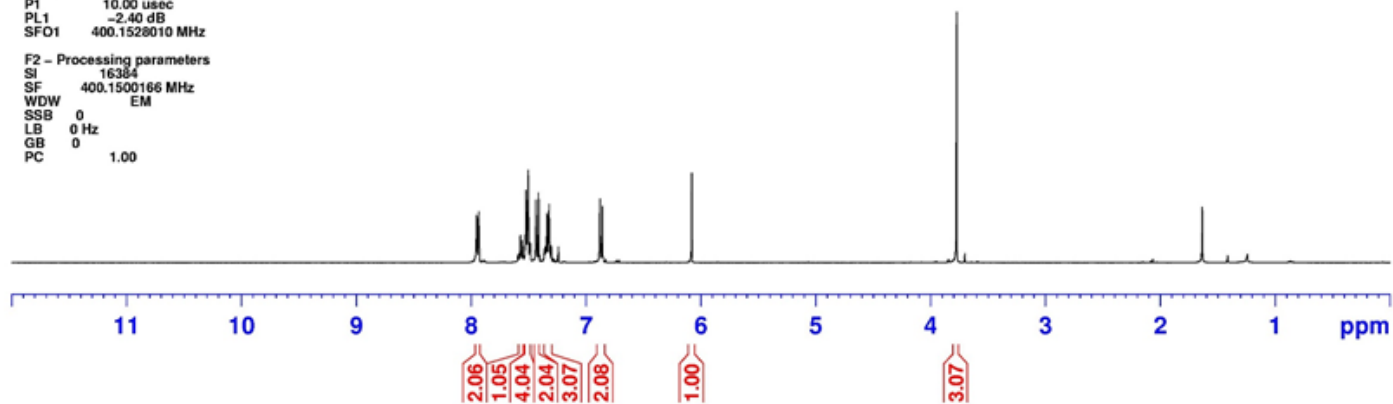

$^{13}\text{C}$  NMR; 100 MHz  
Solvent:  $\text{CDCl}_3$

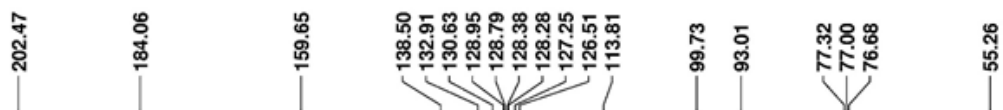

DB-02-02-DEPT

Current Data Parameters  
NAME DB-02-02-DEPT  
EXPNO 1  
PROCNO 1

F2 - Acquisition Parameters  
Date\_ 20211008  
Time 10.35  
INSTRUM spect  
PROBHD 5 mm DUL 13C-1  
PULPROG zgpg30  
TD 65536  
SOLVENT  $\text{CDCl}_3$   
NS 241  
DS 0  
SWH 22727.273 Hz  
FIDRES 0.346791 Hz  
AQ 1.4417920 sec  
RG 2050  
DW 22.000 usec  
DE 6.00 usec  
TE 300.0 K  
D1 2.00000000 sec  
d11 0.03000000 sec  
DELTA 1.89999998 sec  
TD0 1

===== CHANNEL f1 =====  
NUC1  $^{13}\text{C}$   
P1 9.70 usec  
PL1 -0.50 dB  
SFO1 100.6288660 MHz

===== CHANNEL f2 =====  
CPDPRG2 waltz16  
NUC2  $^1\text{H}$   
PCPD2 90.00 usec  
PL2 -2.40 dB  
PL12 15.10 dB  
PL13 18.10 dB  
SFO2 400.1516010 MHz

F2 - Processing parameters  
SI 32768  
SF 100.6178023 MHz  
WDW EM  
SSB 0  
LB 3.00 Hz  
GB 0  
PC 1.00

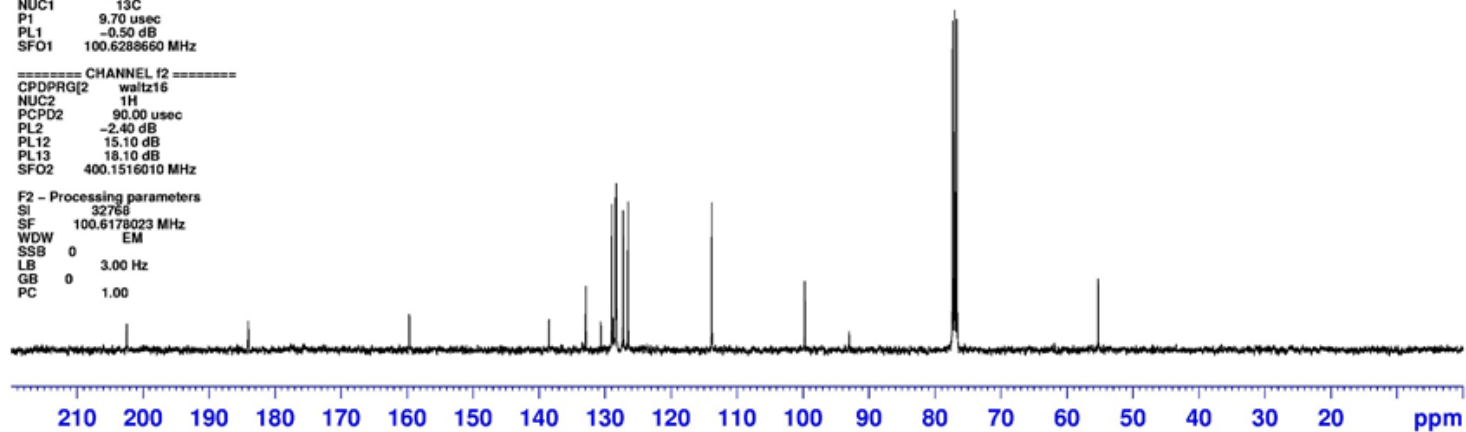



$^1\text{H}$  NMR; 700 MHz  
Solvent:  $\text{CDCl}_3$

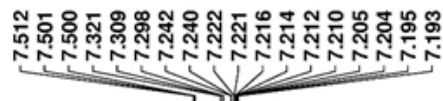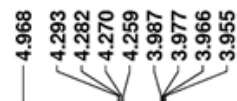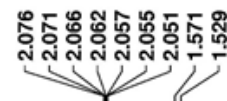

Current Data Parameters  
NAME AMY-3-175-H.fid  
EXPNO 1  
PROCNO 1  
F2 - Processing parameters  
SI 65536  
SF 699.7441520 MHz  
WDW EM  
SSB 0  
LB 0.30 Hz  
GB 0  
PC 1.00

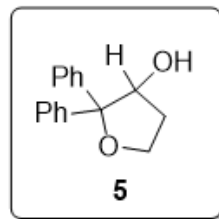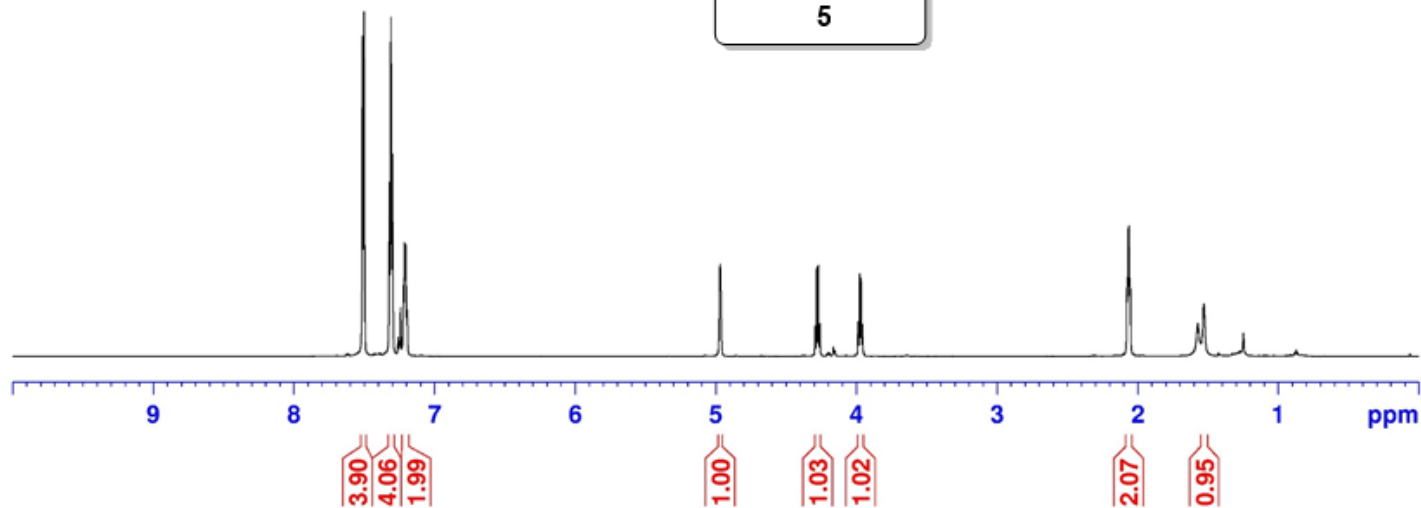

<sup>13</sup>C NMR; 175 MHz

Solvent: CDCl<sub>3</sub>

Current Data Parameters  
NAME AMY-3-175-13C  
EXPNO 3  
PROCNO 1

F2 - Processing parameters  
SI 131072  
SF 175.9532218 MHz  
WDW EM  
SSP 0  
LB 0.30 Hz  
GB 0  
PC 1.00

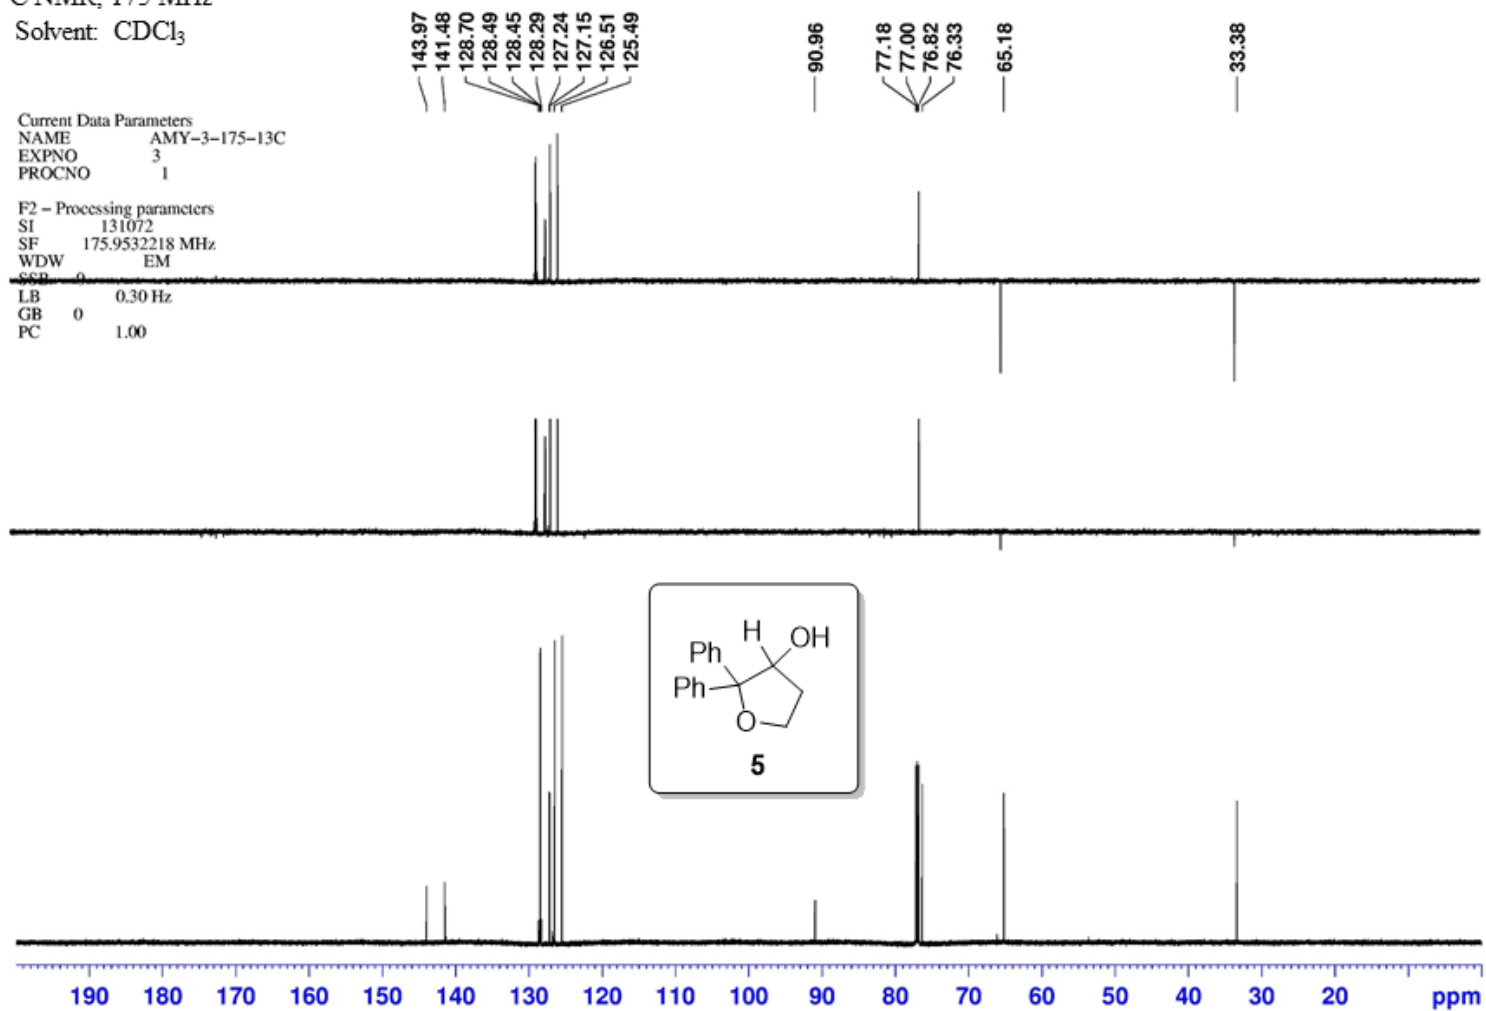

$^1\text{H}$  NMR; 500 MHz  
Solvent:  $\text{CDCl}_3$

Current Data Parameters  
NAME AMY-3-118-1H.fid  
EXPNO 1  
PROCNO 1  
F2 - Processing parameters  
SI 16384  
SF 499.7808477 MHz  
WDW EM  
SSB 0  
LB 0.30 Hz  
GB 0  
PC 1.00

7.386  
7.375  
7.327  
7.315  
7.304  
7.286  
7.240  
7.233

5.486

2.359  
2.353

1.543  
1.231

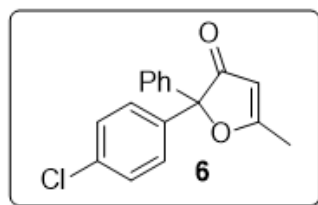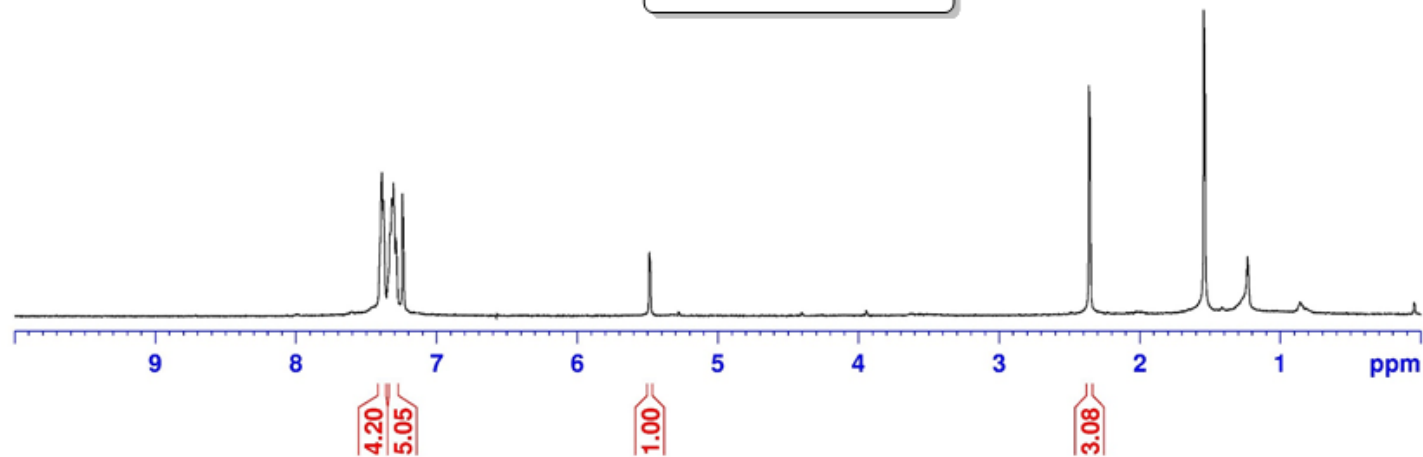

$^{13}\text{C}$  NMR: 125 MHz  
Solvent:  $\text{CDCl}_3$

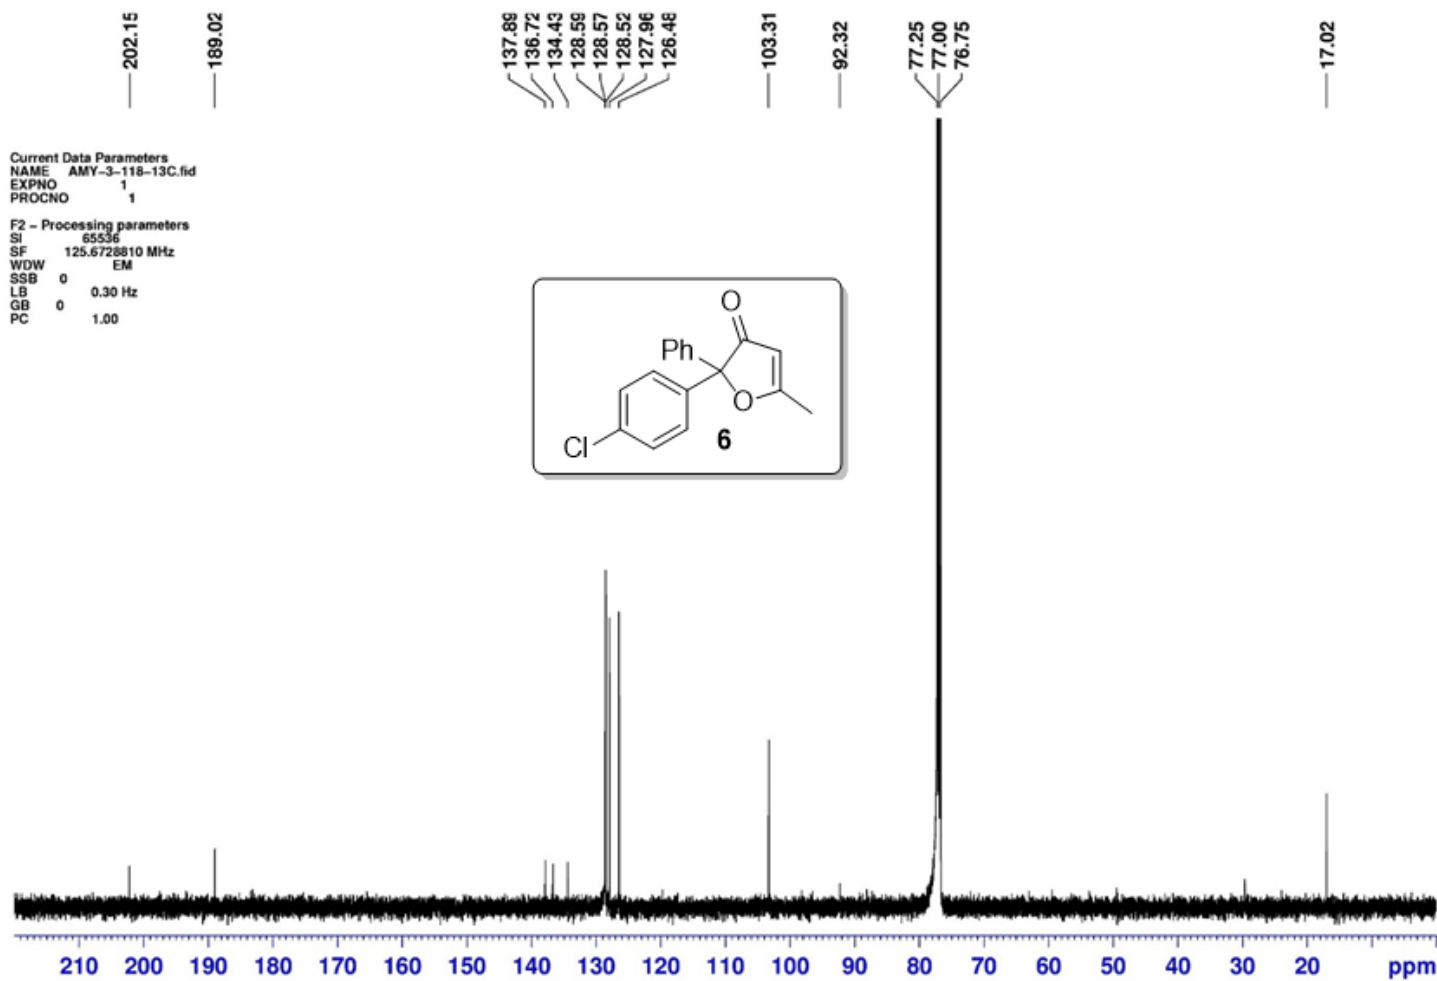

$^1\text{H}$  NMR; 700 MHz  
Solvent:  $\text{CDCl}_3$

7.499  
7.498  
7.487  
7.486  
7.389  
7.377  
7.313  
7.302  
7.301  
7.290  
7.240  
7.206  
7.204  
7.203  
7.194  
7.185  
7.183  
7.182  
7.123  
7.111  
4.952  
4.949  
4.947  
4.943  
4.939  
4.280  
4.269  
4.257  
4.246  
3.970  
3.963  
3.958  
3.951  
3.946  
3.939  
2.291  
2.279  
2.083  
2.077  
2.072  
2.071  
2.066  
2.062  
2.060  
2.059  
2.054  
2.051  
2.047  
2.043  
1.515

Current Data Parameters  
NAME AMY-3-179-B-H.fid  
EXPNO 3  
PROCNO 1  
  
F2 - Processing parameters  
SI 65536  
SF 699.7431030 MHz  
WDW EM  
SSB 0  
LB 0.30 Hz  
GB 0  
PC 1.00

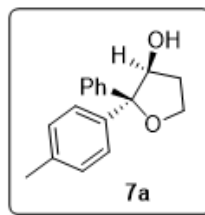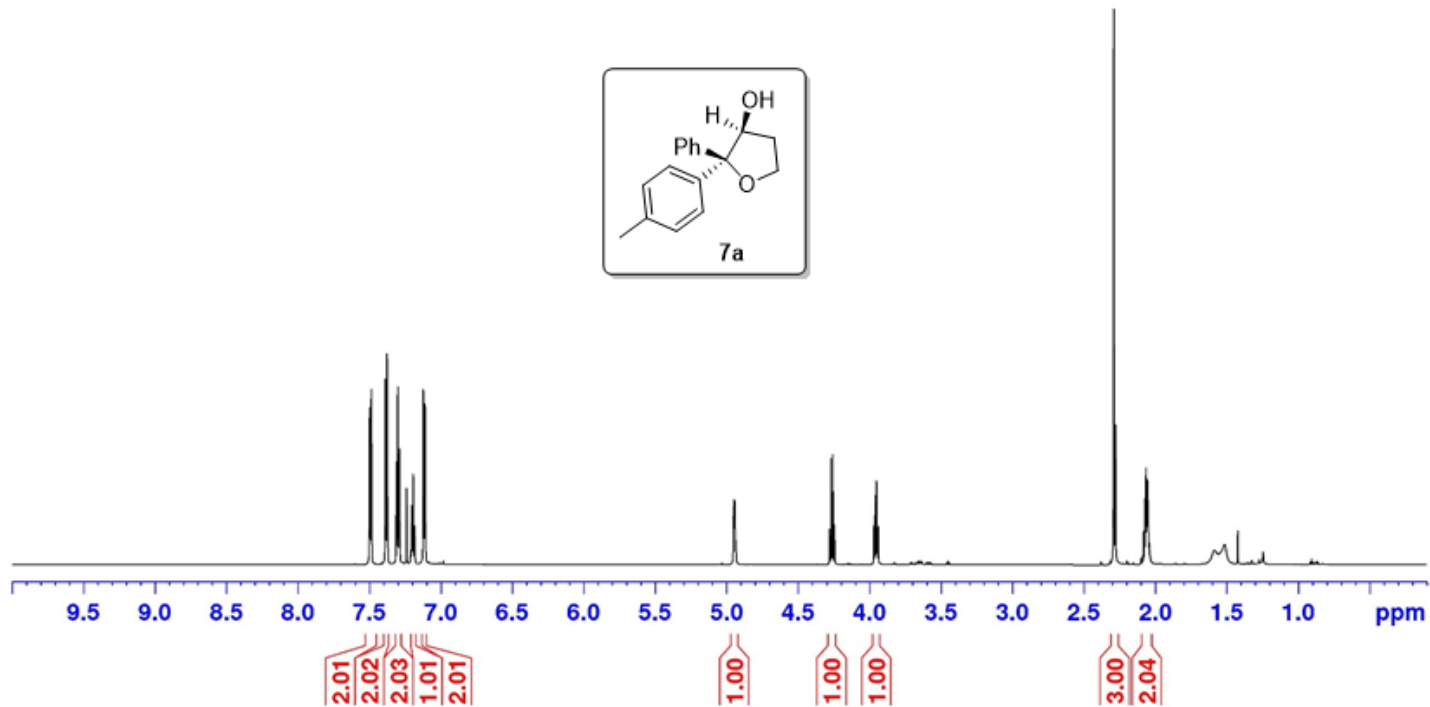

$^{13}\text{C}$  NMR; 175 MHz  
Solvent:  $\text{CDCl}_3$

Current Data Parameters  
NAME AMY-3-179-B-13C  
EXPNO 3  
PROCNO 1

F2 - Processing parameters  
SI 131072  
SF 175.9505437 MHz  
WDW EM  
SSB 0  
LB 0.30 Hz  
GB 0  
PC 1.00

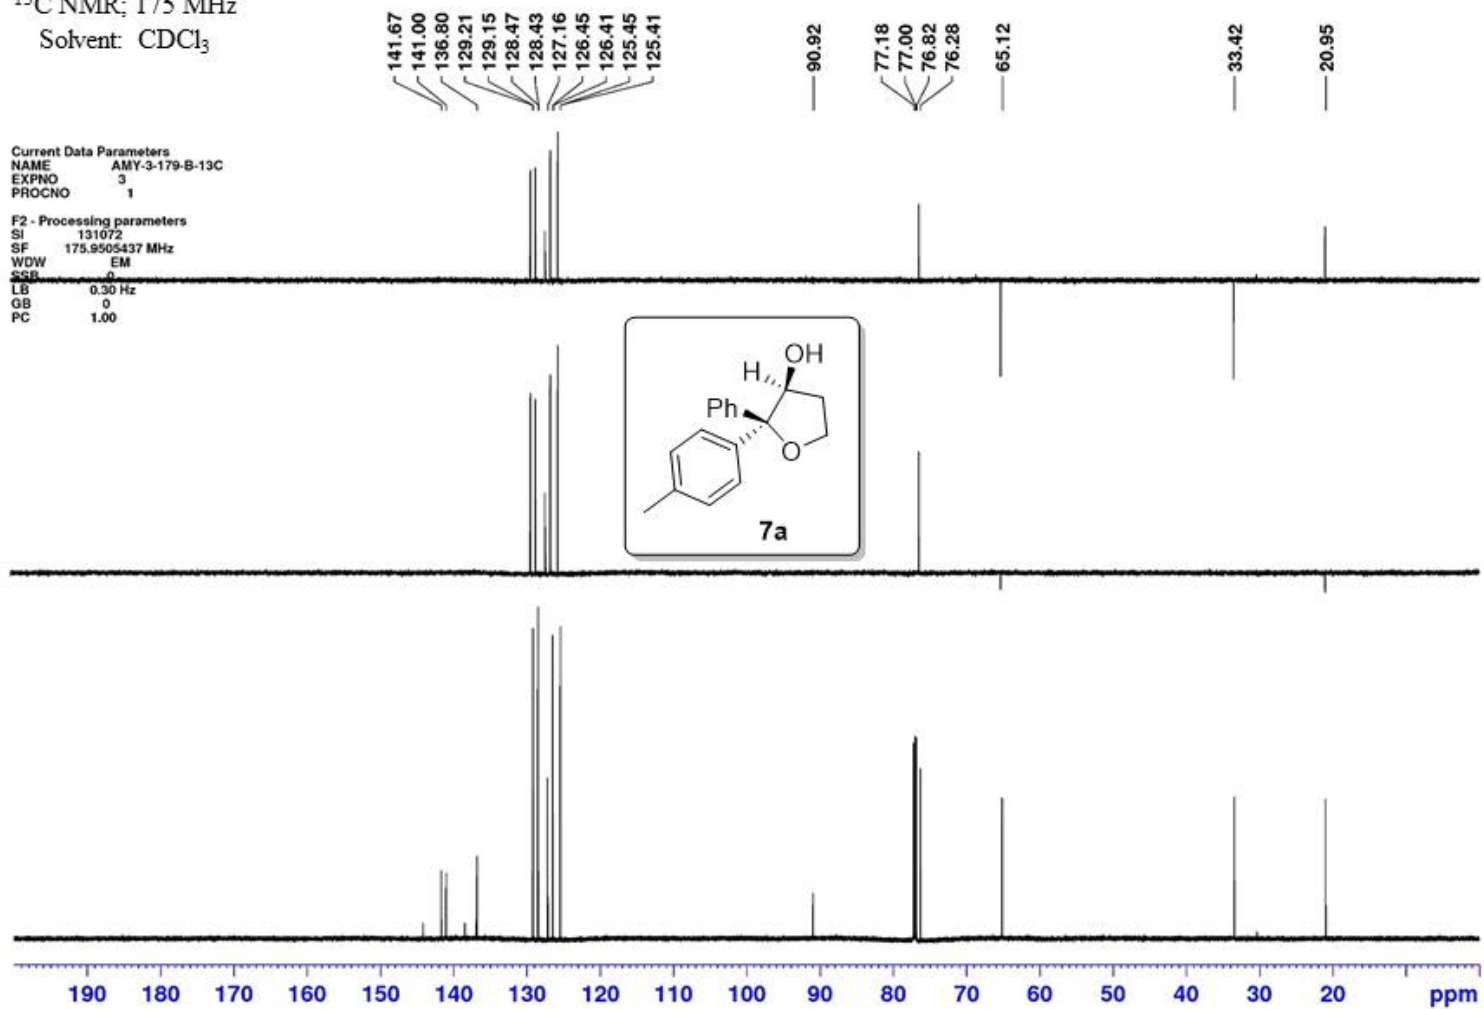

$^1\text{H}$  NMR; 700 MHz  
Solvent:  $\text{CDCl}_3$

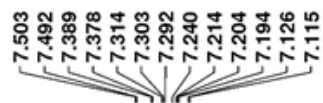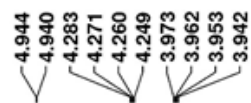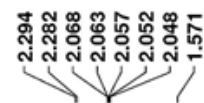

Current Data Parameters  
NAME AMY-3-179-A-H.fid  
EXPNO 3  
PROCNO 1  
  
F2 - Processing parameters  
SI 65536  
SF 699.7431036 MHz  
WDW EM  
SSB 0  
LB 0.30 Hz  
GB 0  
PC 1.00

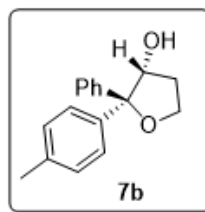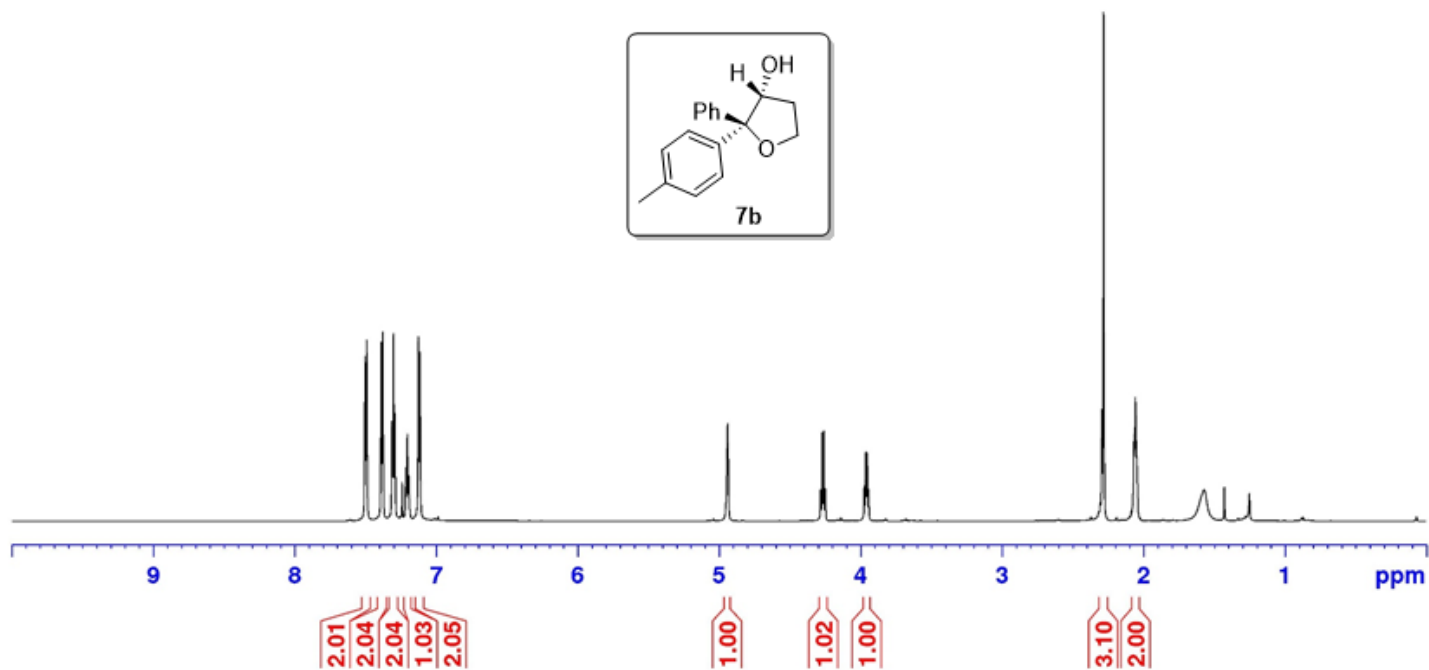

$^{13}\text{C}$  NMR, 175 MHz  
Solvent:  $\text{CDCl}_3$

Current Data Parameters  
NAME Amy-3-179-A-13C  
EXPNO 3  
PROCNO 1

F2 - Processing parameters  
SI 131072  
SF 175.9505454 MHz  
WDW EM  
SSB 0  
LB 0.30 Hz  
GB 0  
PC 1.00

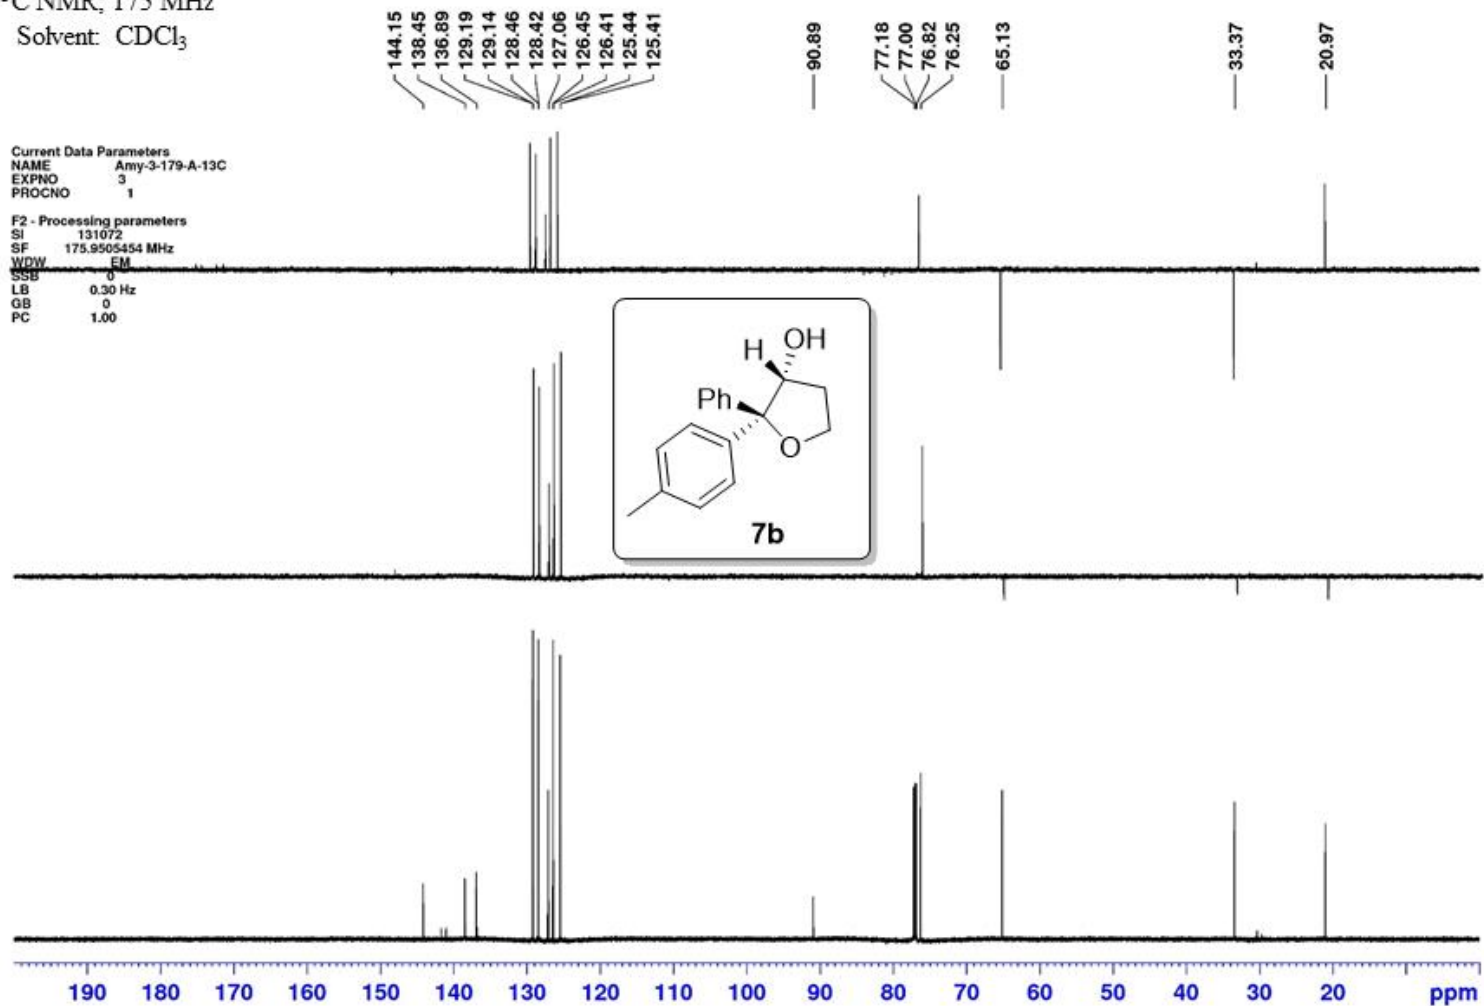



$^1\text{H}$  NMR; 500 MHz

Solvent:  $\text{CDCl}_3$

7.560  
7.543  
7.386  
7.371  
7.245  
7.240  
7.230  
7.214  
7.104  
7.086  
7.083  
7.070  
7.067  
7.045  
7.030  
7.017  
7.015  
7.012  
7.007  
7.000  
6.985  
6.974  
6.914  
6.908  
6.890  
5.742

3.773

1.542

Current Data Parameters  
NAME AMY-3-204-B1-1H.fid  
EXPNO 1  
PROCNO 1

F2 - Processing parameters  
SI 32768  
SF 499.7732650 MHz  
WDW EM  
SSB 0  
LB 0.30 Hz  
GB 0  
PC 1.00

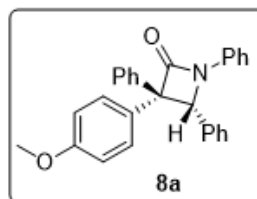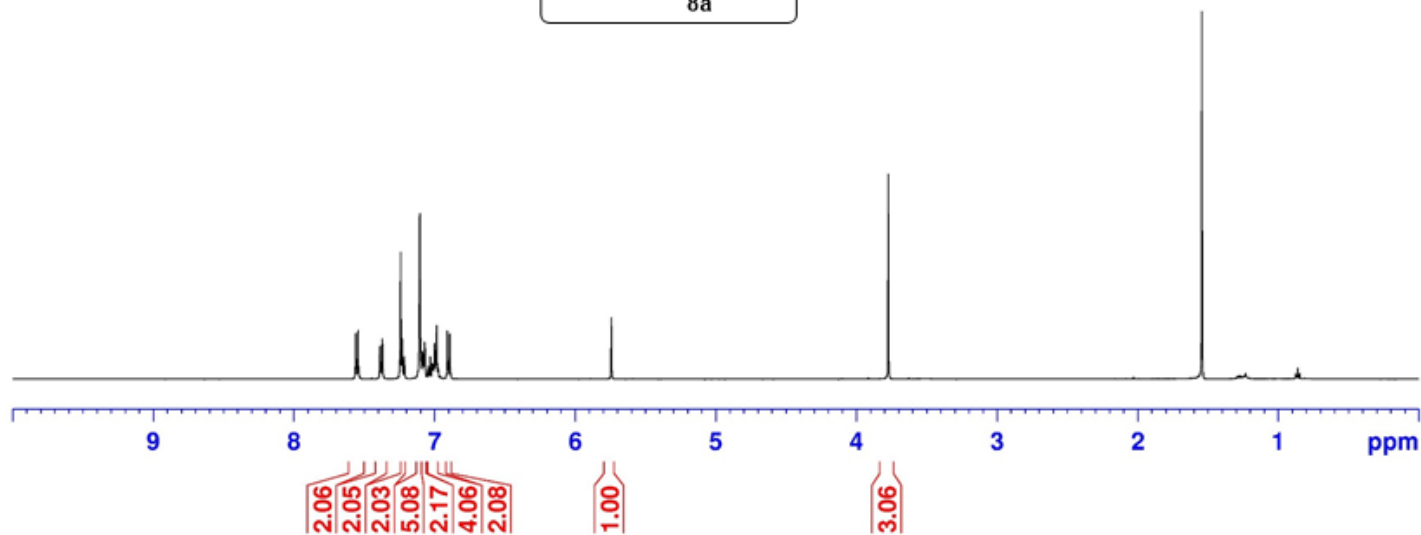

$^{13}\text{C}$  NMR; 175 MHz

Solvent:  $\text{CDCl}_3$

Current Data Parameters  
NAME: AMY-3-204-B-13C  
EXPNO: 3  
PROCNO: 1

F2 - Processing parameters  
SI: 131072  
SF: 175.9549808 MHz  
WDW: EM  
SSB: 0  
LB: 0.30 Hz  
GB: 0  
PC: 1.00

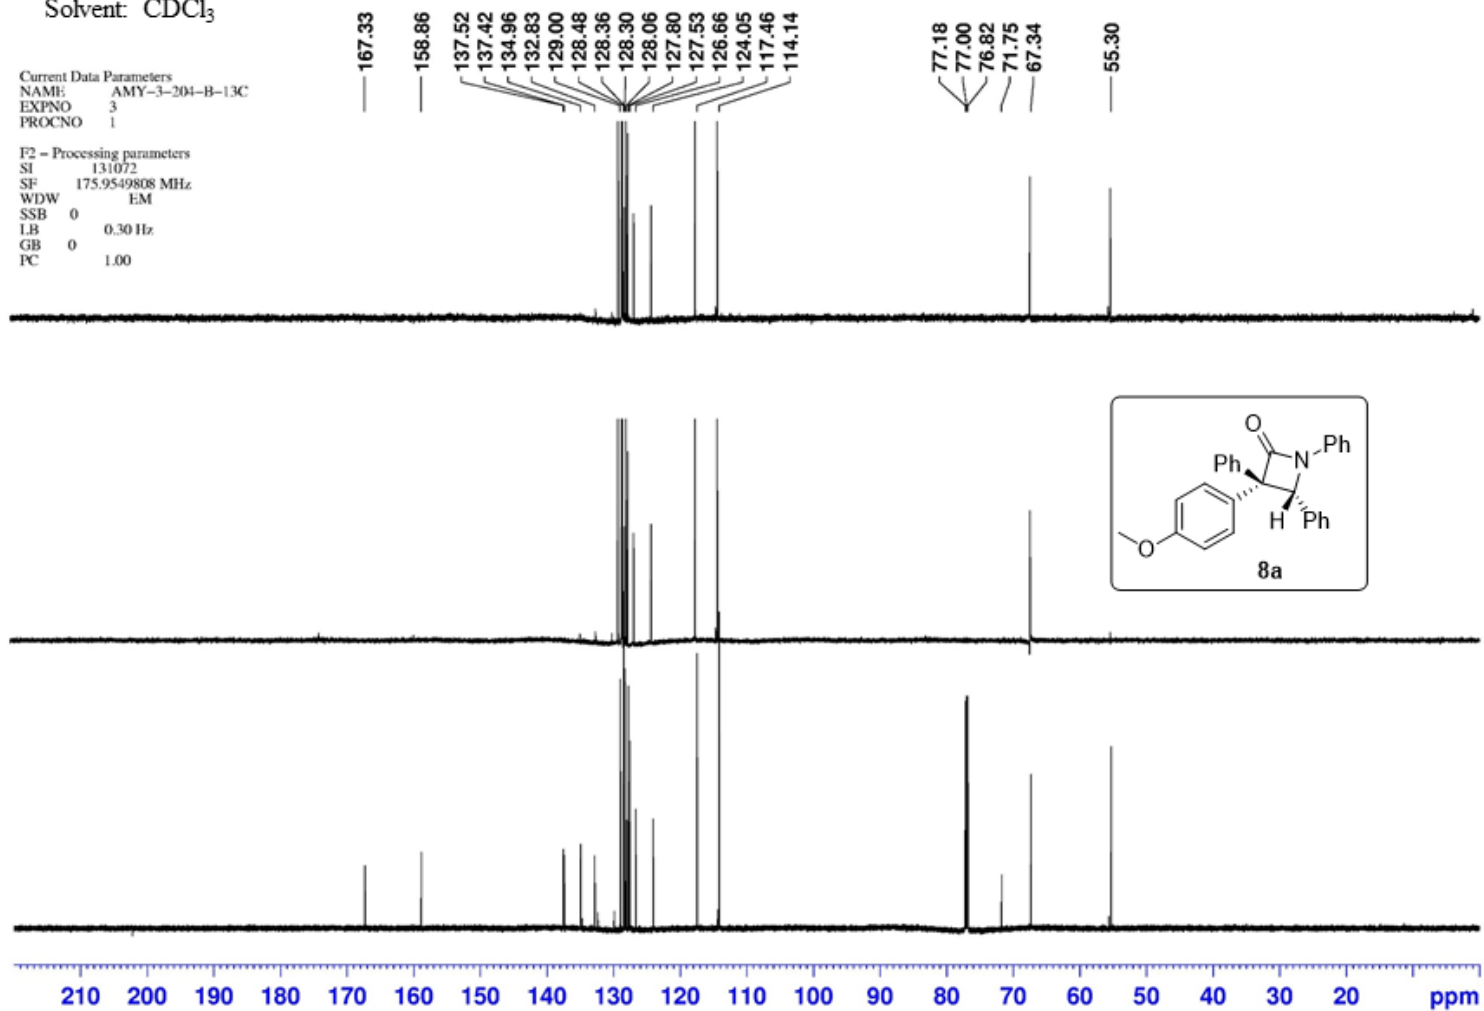

$^1\text{H}$  NMR; 500 MHz

Solvent:  $\text{CDCl}_3$

7.637  
7.622  
7.382  
7.365  
7.348  
7.274  
7.259  
7.240  
7.228  
7.211  
7.129  
7.042  
7.027  
7.011  
6.994  
6.546  
6.529  
5.761

3.637

1.531

Current Data Parameters  
NAME AMY-3-204-A-1H.fid  
EXPNO 1  
PROCNO 1

F2 - Processing parameters  
SI 32768  
SF 499.7732649 MHz  
WDW EM  
SSB 0  
LB 0.30 Hz  
GB 0  
PC 1.00

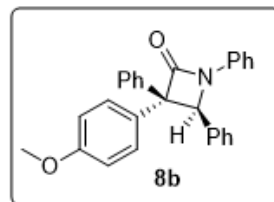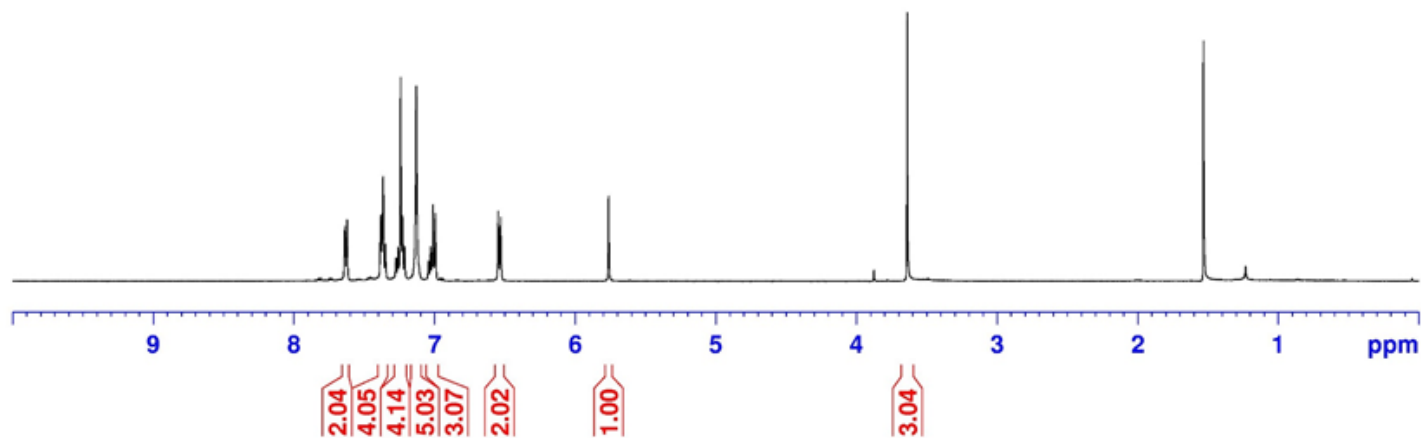

$^{13}\text{C}$  NMR: 175 MHz

Solvent:  $\text{CDCl}_3$

Current Data Parameters  
NAME AMY-3-204-A-13C  
EXPNO 3  
PROCNO 1

F2 - Processing parameters  
SI 131072  
SF 175.9549774 MHz  
WDW EM  
SSB 0  
LB 0.30 Hz  
GB 0

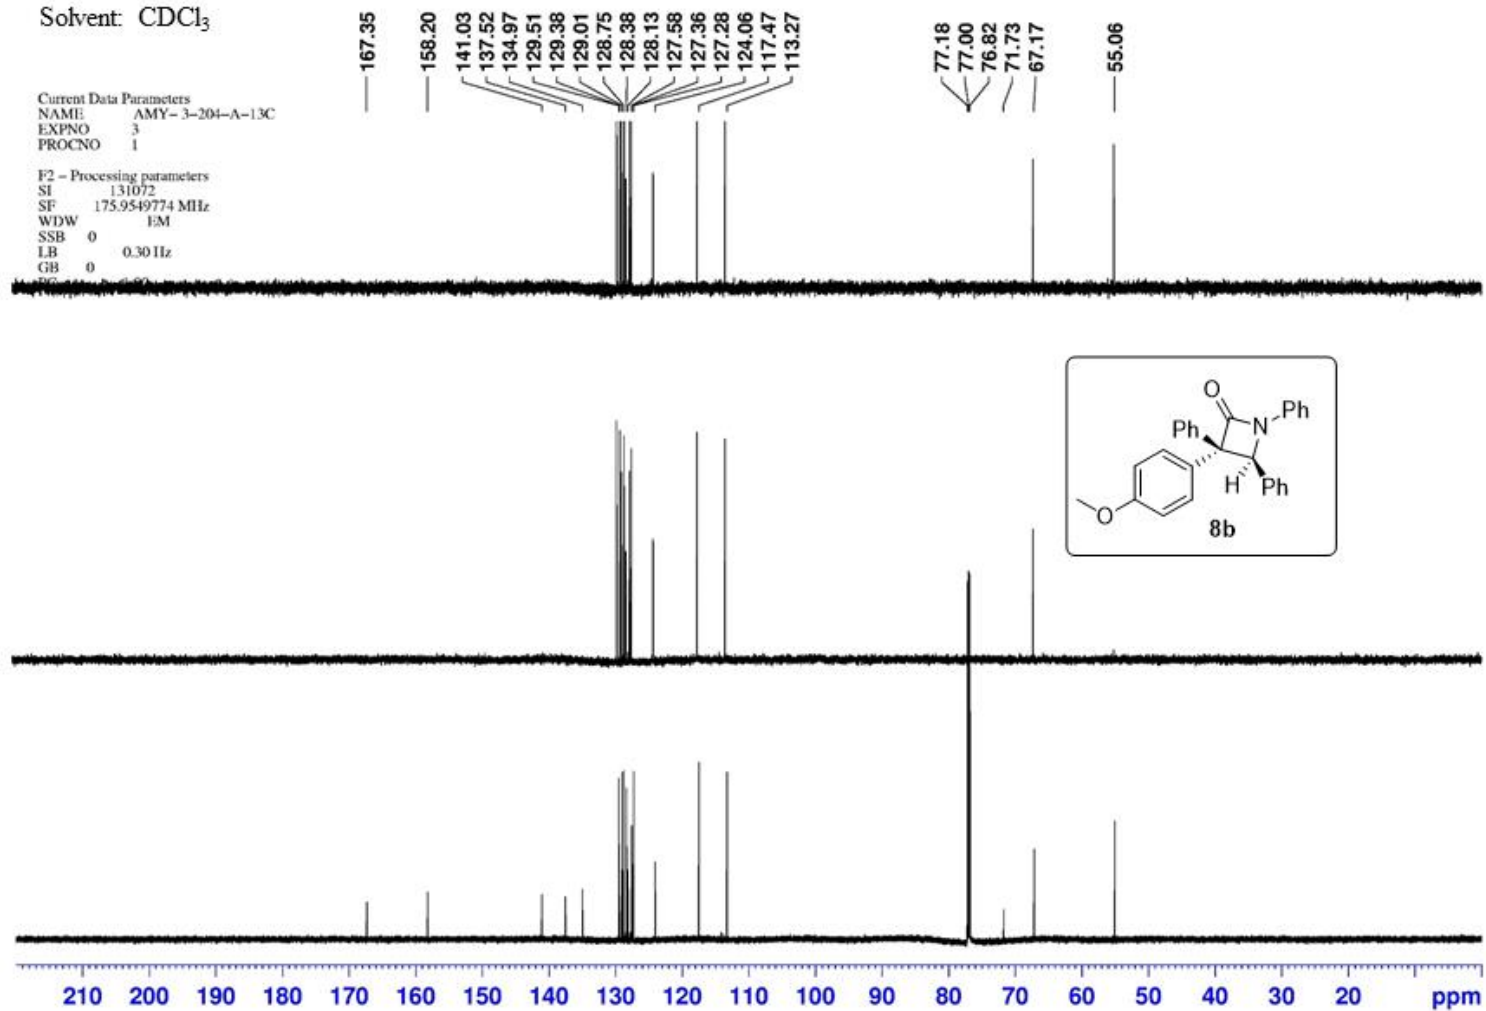

$^1\text{H}$  NMR; 500 MHz

Solvent:  $\text{CDCl}_3$

Current Data Parameters  
NAME AMY-3-209-1H.fid  
EXPNO 1  
PROCNO 1

F2 - Processing parameters  
SI 32768  
SF 499.7732028 MHz  
WDW EM  
SSB 0  
LB 0.30 Hz  
GB 0  
PC 1.00

7.458  
7.452  
7.441  
7.427  
7.417  
7.403  
7.401  
7.388  
7.364  
7.344  
7.327  
7.240  
6.965  
6.947

5.295  
5.141

3.893

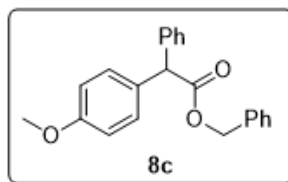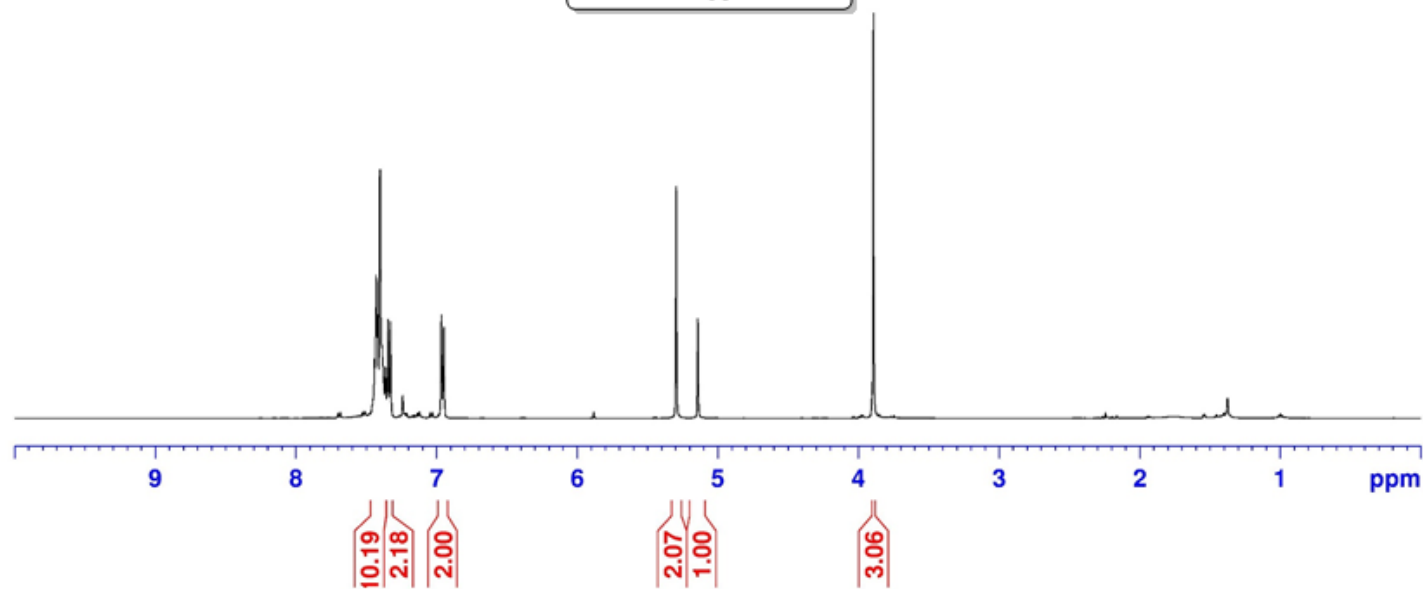

$^{13}\text{C}$  NMR; 125 MHz  
Solvent:  $\text{CDCl}_3$

Current Data Parameters  
NAME AMY-3-209-13C.fid  
EXPNO 1  
PROCNO 1

F2 - Processing parameters  
SI 65536  
SF 125.6698772 MHz  
WDW EM  
SSB 0  
LB 0.30 Hz  
GB 0  
PC 1.00

172.56  
158.72  
138.87  
135.68  
130.65  
129.68  
128.53  
128.47  
128.46  
128.18  
128.13  
127.15  
113.92  
77.25  
77.00  
76.75  
66.83  
56.16  
55.22

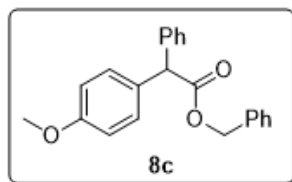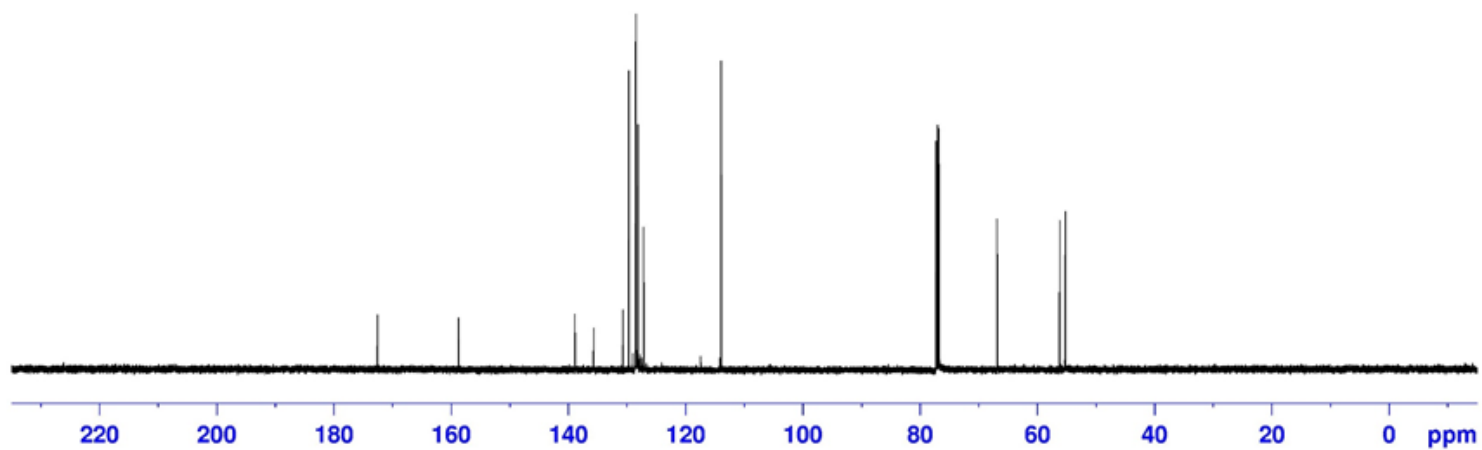

Supplement: d2cc05912f1.pdf [file d2cc05912f1.pdf]
